# Supplementary material for: The Patterns and Causes of Dermatitis in Terrestrial and Semi-Aquatic Mammalian Wildlife
Source: MDPI journal article supplement (doi:10.3390/ani11061691), 2021-06-06
Supplement: s1 [file s1]

## SUPPLEMENTARY MATERIAL

**Search terms S1.** The search terms used to identify the relevant literature in each database.

Web of Science: advanced, all years, all databases selected:

TS= ("dermatitis" OR "exudative dermatitis") AND TS= "wildlife"

Result of 162 (19<sup>th</sup> Dec 2019)

Result of 269 (12<sup>th</sup> March 2021)

Scopus: advanced

TITLE-ABS-KEY ("dermatitis" OR "exudative dermatitis" AND "wildlife")

Result of 98 (19<sup>th</sup> Dec 2019)

Result of 86 (12<sup>th</sup> March 2021)

Google Scholar

"dermatitis" OR "exudative dermatitis" AND "wildlife"

Result of 18,700 and retain first 100 (19<sup>th</sup> Dec 2019)

Result of 19,300 and retain first 100 (12<sup>th</sup> March 2021)

**Table S2.** Complete dataset of all 216 articles that reported wildlife dermatitis. For each article we collected information on the manuscript, the individuals per species, and the dermatitis exhibited by each species, of which, there were 257 cases in total.

| Paper Title                                                                                                                                                         | Author(s)                                                                                                                                                                                                                                                                      | Year | Journal Title                                                                                               | Species                                                                                                                               | Country/Region (location of species) | Animal Origin     | No. Animals                                                               | Conservation for the species/other species mentioned? | Dermatitis Type                                                                           | Clinical signs/Dermatitis                                                                                                                                                                                                                                                                                        | Location of Dermatitis                                                                                 | Cause: Difinitive Diagnoses                                                        | Cause: Speculative/Hypotheses                    | Key terms                                                                                                                                                                  |
|---------------------------------------------------------------------------------------------------------------------------------------------------------------------|--------------------------------------------------------------------------------------------------------------------------------------------------------------------------------------------------------------------------------------------------------------------------------|------|-------------------------------------------------------------------------------------------------------------|---------------------------------------------------------------------------------------------------------------------------------------|--------------------------------------|-------------------|---------------------------------------------------------------------------|-------------------------------------------------------|-------------------------------------------------------------------------------------------|------------------------------------------------------------------------------------------------------------------------------------------------------------------------------------------------------------------------------------------------------------------------------------------------------------------|--------------------------------------------------------------------------------------------------------|------------------------------------------------------------------------------------|--------------------------------------------------|----------------------------------------------------------------------------------------------------------------------------------------------------------------------------|
| Acral lick dermatitis in a jackal ( <i>Canis aureus</i> )                                                                                                           | Yehudam, Israel<br>Nyska, Abraham                                                                                                                                                                                                                                              | 1998 | Journal of zoo and wildlife medicine: official publication of the American Association of Zoo Veterinarians | <i>Canis aureus</i> (jackal)                                                                                                          | Israel                               | Wild Captive      | 1                                                                         | no                                                    | Acral lick dermatitis                                                                     | Lesion                                                                                                                                                                                                                                                                                                           | NA                                                                                                     | NA                                                                                 | Psychogenic                                      | NA                                                                                                                                                                         |
| Alopecia in Rhesus macaques correlates with immunophenotypic alterations in dermal inflammatory infiltrates consistent with hypersensitivity etiology               | Kramer, J.<br>Fahey, M.<br>Santos, R.<br>Carville, A.<br>Wachtman, L.<br>Mansfield, K.                                                                                                                                                                                         | 2010 | Journal of Medical Primatology                                                                              | <i>Macaca mulatta</i> (Rhesus macaques)                                                                                               | United States of America             | Wild Laboratory   | 36                                                                        | no                                                    | Chronic hypersensitivity dermatitis; Atopic dermatitis                                    | Alopecia                                                                                                                                                                                                                                                                                                         | Localized to forearms NA and lower legs, occasionally spread to shoulders and/or thighs, some on torso |                                                                                    | Psychogenic                                      | allergy, dermatitis, hair-loss, macaque skin                                                                                                                               |
| The Alopecia-Syndrome of Spectacled Bears ( <i>Tremarctos ornatus</i> )-What Do We Know, What Can We Do?                                                            | Jäger, K<br>Langguth, S<br>Einspanner, A<br>Schachtner, M<br>Bechstein, N<br>Schoon, H-A                                                                                                                                                                                       | 2013 | Journal of Comparative Pathology                                                                            | <i>Tremarctos ornatus</i> (Andean bear)                                                                                               | Europe                               | Wild Captive      | 96                                                                        | yes                                                   | Dermatitis                                                                                | generalized alopecia with severe pruritus, eborrhoea sicca and lichenification, perivascular der-matitis                                                                                                                                                                                                         | NA                                                                                                     | NA                                                                                 | allergic skin disorder, genetic or social issues | NA                                                                                                                                                                         |
| Alternaria fungal dermatitis in free-ranging javelina ( <i>Pecari tajacu</i> )                                                                                      | Shender, Lisa A.<br>Gerbold, Rick<br>Sanchez, Susan<br>Keel, M. Kevin                                                                                                                                                                                                          | 2011 | Journal of Wildlife Diseases                                                                                | <i>Pecari tajacu</i> (javelina)                                                                                                       | United States of America             | Wild Free-Living  | 1                                                                         | no                                                    | Dermatitis                                                                                | Fungal dermatitis and cellulitis. A pus-filled tract within the rostrum. Hyperkeratotic. Proliferative fibrous connective tissue                                                                                                                                                                                 | rostrum, snout, eyes, feet, capari                                                                     | Fungus - ( <i>Alternaria sp.</i> )                                                 | NA                                               | NA                                                                                                                                                                         |
| The Andean bear alopecia syndrome may be caused by social housing                                                                                                   | Van Horn, R. C.<br>Sutherland-Smith, M.<br>Bracho-Soto, A. E.<br>Thomas, G.<br>Shanks, J. A.<br>Owen, M. A.                                                                                                                                                                    | 2019 | Zoo biology                                                                                                 | <i>Tremarctos ornatus</i> (Andean bear)                                                                                               | United States of America             | Wild Captive      | 20                                                                        | yes                                                   | Hypersensitivity dermatitis                                                               | Pruritus, alopecia, mucopurulent ocular discharge or conjunctivitis and changes to the epidermis include thickening, roughness, and increased pigmentation                                                                                                                                                       | Face and periorcular region as well as the caudal lumbar region and the limbs                          | NA                                                                                 | Psychogenic                                      | alopecia, captivity, epidemiology, ex situ, <i>Tremarctos ornatus</i>                                                                                                      |
| Anticoagulant exposure and rodenticide mange in bobcats and mountain lions in urban southern California                                                             | Riley, Seth P. D.<br>Bronley, Cassidy<br>Poppenga, Robert H.<br>Uzal, Francisco A.<br>Whited, Lynn<br>Sauvajot, Raymond M.                                                                                                                                                     | 2007 | Journal of Wildlife Management                                                                              | <i>Lynx rufus</i> (bobcat),<br><i>Puma concolor</i> (mountain lion)                                                                   | United States of America             | Wild Free-living  | 21 - (19 bobcat, 2 mountain lion)                                         | yes                                                   | Dermatitis (mange)                                                                        | proliferative dermatitis with hyperkeratosis, epidermal scaling                                                                                                                                                                                                                                                  | head, shoulders, body, hind legs                                                                       | Mite - ( <i>Notodres cuti</i> )                                                    | NA                                               | anticoagulant rodenticides, bobcat, fragmentation, mountain lion, multiple stressors, notoedric mange, southern California, synergistic effects, toxicology, urbanization. |
| Arcanobacterium phocae infection in mink ( <i>Neovison vison</i> ), seals ( <i>Phoca vitulina</i> , <i>Halichoerus grypus</i> ) and otters ( <i>Lutra lutra</i> )   | Nonnemann, Bettina<br>Chriel, Mariann<br>Larsen, Gitte<br>Hansen, Mette Sif<br>Holm, Elisabeth<br>Pedersen, Karl                                                                                                                                                               | 2017 | Acta veterinaria scandinavica                                                                               | <i>Neovison vison</i> (mink)                                                                                                          | Denmark                              | Wild Captive      | 14                                                                        | no                                                    | pododermatitis; dermatitis                                                                | Acute profound suppurative and necrotizing pododermatitis. Subacute suppurative and necrotizing dermatitis with dry crusts around nares and hyperkeratosis of the surrounding epidermis. Severe superficial suppurative and necrotizing pododermatitis. Chronic profound suppurative and necrotizing dermatitis. | feet, head, lumbar                                                                                     | Bacteria - ( <i>Arcanobacterium phocae</i> )                                       | NA                                               | <i>Arcanobacterium phocae</i> ,<br><i>Arcanobacterium phocinimile</i> , Mink, Seal, Otter                                                                                  |
| Assessing causes and significance of red squirrel ( <i>Sciurus vulgaris</i> ) mortality during regional population restoration: An applied conservation perspective | Shuttleworth, Craig M<br>Lisa Signorile, A<br>Everest, David J<br>Paul, Duff<br>Lurz, Peter Ww                                                                                                                                                                                 | 2015 | Hystrix                                                                                                     | <i>Sciurus vulgaris</i> (red squirrels)                                                                                               | Wales                                | Wilde Free-Living | 2                                                                         | yes                                                   | Exudative dermatitis                                                                      | Squirrelpox-like lesions                                                                                                                                                                                                                                                                                         | Lower lip, side of lips, digits                                                                        | NA                                                                                 | Bacteria - ( <i>Staphylococcus aureus</i> )      | Red squirrel, <i>Sciurus vulgaris</i> , mortality, adenovirus, Wales,                                                                                                      |
| Association of a lukM-positive clone of <i>Staphylococcus aureus</i> with fatal exudative dermatitis in red squirrels ( <i>Sciurus vulgaris</i> )                   | Simpson, V. R.<br>Davison, N. J.<br>Kearns, A. M.<br>Pichon, B.<br>Hudson, L. O.<br>Koylass, M.<br>Blackett, T.<br>Butler, H.<br>Ravigade, J. P.<br>Whatmore, A. M.                                                                                                            | 2013 | Veterinary Microbiology                                                                                     | <i>Sciurus vulgaris</i> (red squirrels)                                                                                               | England, Bailiwick of Jersey         | Wild Free-Living  | 10 (4 IOW, 6 Jersey)                                                      | no                                                    | Exudative dermatitis                                                                      | Exudative scabby lesions, inflammation and sloughing of the skin of the feet and ischemic necrosis of digits. exudative, ulcerative, necrotic dermatitis with epidermal hyperplasia and hyperkeratosis and numerous colonies of gram-positive cocci, both in the exudate and within intradermal pustules         | Mouth and/or nose, and some cases eyelids, feet and digits                                             | NA                                                                                 | Bacteria - ( <i>Staphylococcus aureus</i> )      | <i>Sciurus vulgaris</i> , Dermatitis, <i>Staphylococcus phocinimile</i> , CC49, LukM gene                                                                                  |
| Atypical dermatophytosis in 12 North American porcupines ( <i>Erethizon dorsatum</i> ) from the Northeastern United States 2010-2017                                | Needle, David B.<br>Gibson, Robert<br>Hollingshead, Nicholas A.<br>Sidor, Igga F.<br>Marra, Nicholas J.<br>Rothenheber, Derek<br>Thachil, Anil J.<br>Stantonpe, Bryce J.<br>Stevens, Brian A.<br>Ellis, Julie C.<br>Spanswick, Shelley<br>Murray, Maureen<br>Goodman, Laura B. | 2019 | Pathogens                                                                                                   | <i>Erethizon dorsatum</i> (North American porcupines)                                                                                 | United States of America             | Wild Free-living  | 12                                                                        | no                                                    | dermatitis, dermatophytosis                                                               | Lesions consisted of diffuse severe epidermal hyperkeratosis and mild hyperplasia with mild lymphoplasmacytic dermatitis and no folliculitis                                                                                                                                                                     | dorsum, face, tail, limbs                                                                              | Fungus - ( <i>Trichophyton sp.Arthroderma benhamiae</i> )                          | NA                                               | dermatophyte, porcupine, Erethizon, fungus, metagenomics, fungal genetics, molecular diagnostics                                                                           |
| Berlin squirrelpox virus, a new poxvirus in red squirrels, Berlin, Germany                                                                                          | Wibbelt, Gudrun<br>Tausch, Simon H.<br>Dabrowski, Piotr W.<br>Kershaw, Olivia<br>Nitsche, Andreas<br>Schrick, Livia                                                                                                                                                            | 2017 | Emerging infectious diseases                                                                                | <i>Sciurus vulgaris</i> (red squirrels)                                                                                               | Germany                              | Wild Free-living  | 10                                                                        | yes                                                   | exudative and erosive-to-ulcerative dermatitis                                            | moist crusty skin lesions.                                                                                                                                                                                                                                                                                       | nose, digits, tail, genital regions                                                                    | Virus - (Poxvirus family)                                                          | NA                                               | squirrelpox, poxvirus, squirrel, Sciuridae, Berlin, Germany, skin disease, dermatitis, viruses, red squirrels, <i>Sciurus vulgaris</i> , Berlin squirrelpox virus          |
| Candidiasis in captive pinnipeds                                                                                                                                    | Dunn, J. L.<br>Buck, J. D.<br>Spotte, S.                                                                                                                                                                                                                                       | 1984 | Journal of the American Veterinary Medical Association                                                      | <i>Halichoerus grypus</i> (gray seals), <i>Phoca vitulina</i> (harbor seals), <i>Mirounga angustirostris</i> (northern elephant seal) | United States of America             | Wild Captive      | 16 [7 - (gray seals), 8 - (harbor seals), , 1 - (northern elephant seal)] | yes                                                   | Dermatitis                                                                                | purulent nasal discharge, inflammation of the lips at the mucocutaneous junction, periorcular alopecia, vaginitis and dermatitis.                                                                                                                                                                                | skin lesions around the eyes, flippers, and abdomen                                                    | Fungus - ( <i>Candida albicans</i> )                                               | NA                                               | NA                                                                                                                                                                         |
| A case of exfoliative dermatitis in a captive southern white rhinoceros ( <i>Ceratotherium simum simum</i> )                                                        | Bauwens, Luc<br>De Vroey, Charles<br>De Meurichy, Walter                                                                                                                                                                                                                       | 1996 | Journal of Zoo and Wildlife Medicine                                                                        | <i>Ceratotherium simum simum</i> (southern white rhinoceros)                                                                          | Belgium                              | Wild Captive      | 1                                                                         | no                                                    | Exfoliative dermatitis                                                                    | Skin lesions/abrasions enlarging to irregular dermal erosions up to 20cm in length , detaching edges and hyperemic surface covered with brown/red exudate                                                                                                                                                        | Back                                                                                                   | Fungus - ( <i>Malassezia pachydermatis</i> and <i>Candida parapsilosis</i> yeasts) | NA                                               | Southern white rhinoceros, <i>Ceratotherium simum simum</i> , exfoliative dermatitis, <i>Malassezia pachydermatis</i> , <i>Candida parapsilosis</i> , natamycin            |
| A case of parapoxvirus infection in wild Japanese serows ( <i>Capricornis crispus</i> ) in Ishikawa prefecture                                                      | Yata, S                                                                                                                                                                                                                                                                        | 1996 | Japanese Society of Zoo and Wildlife Medicine                                                               | <i>Capricornis crispus</i> (Japanese serow)                                                                                           | Japan                                | Wild Free-Living  | 1                                                                         | no                                                    | Contagious pustular dermatitis                                                            | Abscesses, keratinization on the skin, reddish knots                                                                                                                                                                                                                                                             | Left fore and hind limbs, lips                                                                         | Virus - (parapoxvirus)                                                             | NA                                               | Contagious pustular dermatitis, Japanese serow ( <i>Capricornis crispus</i> ), Parapox virus                                                                               |
| A case of suspected contact dermatitis in a juvenile cynomolgus monkey ( <i>Macaca fascicularis</i> )                                                               | Morris, Joanne<br>Etheridge, Marcia                                                                                                                                                                                                                                            | 2008 | Journal of medical primatology                                                                              | <i>Macaca fascicularis</i> (cynomolgus monkey)                                                                                        | United States of America             | Wild Captive      | 1                                                                         | no                                                    | Eosinophilic dermatitis                                                                   | Ruptured blisters, crusts, and papules on the extremities and face                                                                                                                                                                                                                                               | Extremities and face, oral lesions                                                                     | NA                                                                                 | NA (contact dermatitis suspected)                | eosinophilia, juvenile cynomolgus macaque, vesicular dermatitis                                                                                                            |
| Causes of red squirrel ( <i>Sciurus vulgaris</i> ) mortality in England                                                                                             | Duff, JP<br>Haley, P<br>Wood, R<br>Higgins, RJ                                                                                                                                                                                                                                 | 2010 | Veterinary Record                                                                                           | <i>Sciurus vulgaris</i> (red squirrels)                                                                                               | England                              | Wild Free-living  | 6                                                                         | yes                                                   | dermatitis                                                                                | dermatitis                                                                                                                                                                                                                                                                                                       | ventral body and head                                                                                  | Louse - ( <i>Neohaemaphysinus sciuri</i> )                                         | NA                                               | NA                                                                                                                                                                         |
| Characterization of dermatologic changes in geriatric rhesus macaques                                                                                               | Huneke, R. B.<br>Foltz, C. J.<br>Vandewoude, S.<br>Mandrell, T. D.<br>Garman, R. H.                                                                                                                                                                                            | 1996 | Journal of Medical Primatology                                                                              | <i>Macaca mulatta</i> (Rhesus macaques)                                                                                               | United States of America             | Wild Laboratory   | 13                                                                        | no                                                    | Subacute dermatitis/ulcerative dermatitis/ perivascular dermatitis/ acanthotic dermatitis | Dermal lesions, erythematous skin, wrinkling, focal skin scaling, thinning of hair, foot calluses, and exudative lesions                                                                                                                                                                                         | Thigh, neck, chest, foot                                                                               | NA                                                                                 | Age                                              | skin-aging- endocrinedermatitis, dermatology                                                                                                                               |
| Chorioptic mange in a wild Japanese serow                                                                                                                           | Shibata, A.<br>Yachimori, S.<br>Morita, T.<br>Kanda, E.<br>Ike, K.<br>Imai, S.                                                                                                                                                                                                 | 2003 | Journal of Wildlife Diseases                                                                                | <i>Capricornis crispus</i> (Japanese serow)                                                                                           | Japan                                | Wild Free-living  | 1                                                                         | yes                                                   | dermatitis                                                                                | Parakeratotic hyperkeratosis lesions, mange, alopecia, marked lichenification, accumulation of crust, and fissurin                                                                                                                                                                                               | legs, thorax, ventral abdomen and perineum, axilla and inguinal regions                                | Mite - ( <i>Choriopites bovis</i> )                                                | NA                                               | <i>Capricornis crispus</i> , <i>Choriopites bovis</i> , chorioptic mange, Japanese serow, mites.                                                                           |
| Chromobacteriosis in a Chinese red panda ( <i>Ailurus fulgens styani</i> )                                                                                          | Dyer, Nw<br>Krogh, Df<br>Davold, R<br>Wilson, Sl<br>White, Dg                                                                                                                                                                                                                  | 2000 | Journal of veterinary diagnostic investigation                                                              | <i>Ailurus fulgens styani</i> (Chinese red panda)                                                                                     | United States of America             | Wild Captive      | 1                                                                         | no                                                    | Necrotising dermatitis                                                                    | Skin and subcutaneous tissue from around the interscapular abscess showed necrotizing dermatitis and cellulitis.                                                                                                                                                                                                 | Skin                                                                                                   | Bacteria - ( <i>Chromobacterium violaceum</i> )                                    | NA                                               | bacteria, Chromobacterium, case studies, Florida, North Dakota                                                                                                             |
| Chromobacterium violaceum Infection in a Free-ranging Howler Monkey in Costa Rica                                                                                   | Baldi, M.<br>Morales, J. A.<br>Hernandez, G.<br>Jimenez, M.<br>Alfaro, A.<br>Barquero-Calvo, E.                                                                                                                                                                                | 2010 | Journal of Wildlife Diseases                                                                                | <i>Alouatta palliata</i> (Howler monkey)                                                                                              | Costa rica                           | Wild Free-Living  | 1                                                                         | no                                                    | Ulcerative dermatitis                                                                     | Skin lesions, skin ulcers                                                                                                                                                                                                                                                                                        | Extremities                                                                                            | Bacteria - ( <i>Chromobacteria violaceum</i> )                                     | NA                                               | Bacterial infection, <i>Chromobacterium violaceum</i> , opportunistic pathogen, wild primate                                                                               |

|                                                                                                                                                                                                       |                                                                                                                                                           |      |                                                        |                                                                                               |                          |                  |                                                                                                                                                              |     |                                                                                                                   |                                                                                                                                                                                                                                                                                                                                                                 |                                                                                                                            |                                                                                                                                                                                                                                                                                                                           |                                                                                                                    |                                                                                                                                                        |
|-------------------------------------------------------------------------------------------------------------------------------------------------------------------------------------------------------|-----------------------------------------------------------------------------------------------------------------------------------------------------------|------|--------------------------------------------------------|-----------------------------------------------------------------------------------------------|--------------------------|------------------|--------------------------------------------------------------------------------------------------------------------------------------------------------------|-----|-------------------------------------------------------------------------------------------------------------------|-----------------------------------------------------------------------------------------------------------------------------------------------------------------------------------------------------------------------------------------------------------------------------------------------------------------------------------------------------------------|----------------------------------------------------------------------------------------------------------------------------|---------------------------------------------------------------------------------------------------------------------------------------------------------------------------------------------------------------------------------------------------------------------------------------------------------------------------|--------------------------------------------------------------------------------------------------------------------|--------------------------------------------------------------------------------------------------------------------------------------------------------|
| Chronic dermatitis in nutria in Louisiana                                                                                                                                                             | Chabreck, Robert H<br>Thompson, Roger B<br>Einsinger, Allan B                                                                                             | 1977 | Journal of wildlife diseases                           | <i>Myocastor coypus</i> (nutria)                                                              | United States of America | Wild Free-Living | 5                                                                                                                                                            | no  | Chronic dermatitis                                                                                                | Lesions, necrosis of the epidermis, thickened skin, inflammation and bacterial and fungal infections                                                                                                                                                                                                                                                            | Ventral neck and chest, and upper portion of the front legs                                                                | Plant matter - ( <i>Bidens laevis</i> )                                                                                                                                                                                                                                                                                   | NA                                                                                                                 | NA                                                                                                                                                     |
| Chronic eosinophilic dermatitis associated with persistent feline herpes virus infection in cheetahs ( <i>Acinonyx jubatus</i> )                                                                      | Munson, L<br>Wack, R<br>Duncan, M<br>Monial, KJ<br>Boon, D<br>Stalis, I<br>Crawshaw, GJ<br>Cameron, Kn<br>Mortenson, J<br>Chino, S                        | 2004 | Veterinary pathology                                   | <i>Acinonyx jubatus</i> (cheetah)                                                             | United States of America | Wild Captive     | 20                                                                                                                                                           | yes | Ulcerative and eosinophilic dermatitis                                                                            | Cutaneous lesions, erythematous, ulcerated plaques. a white, eosinophil-rich exudate was present in many cases                                                                                                                                                                                                                                                  | Lesions also occurred commonly at the commissures of the lips, top of the head, distal forelegs, flank, tail, and footpads | Virus - (feline herpes virus 1 (FHV1))                                                                                                                                                                                                                                                                                    | NA                                                                                                                 | <i>Acinonyx jubatus</i> , cheetahs, dermatitis, eosinophils, feline herpes virus 1, pseudoepitheliomatous hyperplasia                                  |
| Chronic pruritic dermatitis in asthmatic monkeys: A subhuman primate analogue of atopic dermatitis?                                                                                                   | Patterson, Roy<br>Harris, Kathleen                                                                                                                        | 1981 | International Archives of Allergy and Immunology       | <i>Macaca mulatta</i> (Rhesus macaques)                                                       | United States of America | Wild Laboratory  | 2                                                                                                                                                            | no  | Atopic dermatitis                                                                                                 | Chronic, generalized pruritus and dermatitis.Skin lesions, thickened, scaling, lichenified dermatitis                                                                                                                                                                                                                                                           | Flexural surfaces of the forearms                                                                                          | NA                                                                                                                                                                                                                                                                                                                        | Physiological - asthmatic monkeys                                                                                  | NA                                                                                                                                                     |
| Clinical and pathological characterization of northern elephant seal skin disease                                                                                                                     | Beckmen, K. B.<br>Lowenstine, L. J.<br>Newman, J.<br>Hill, J.<br>Hanni, K.<br>Gerber, J.                                                                  | 1997 | Journal of Wildlife Diseases                           | <i>Mirounga angustirostris</i> (northern elephant seal)                                       | United States of America | Wild Free-living | 207                                                                                                                                                          | no  | Ulcerative dermatitis                                                                                             | skin lesions were characterized by patchy to extensive alopecia and hyperpigmentation, punctate or coalescing epidermal ulceration, and occasionally, massive skin necrosis. Microscopic lesions included ulcerative dermatitis with hyperkeratosis, squamous metaplasia and atrophy of sebaceous glands.                                                       | body surface                                                                                                               | NA                                                                                                                                                                                                                                                                                                                        | exposure to polyhalogenated aromatic hydrocarbons (PHAHs) which include PCBs and polychlorinated biphenyls (PBBs). | Northern elephant seal, Mirounga angustirostris, hyperkeratosis, squamous metaplasia, ulcerative dermatitis, skin disease, PCB, DDT.                   |
| Clinical mange of the black bear, <i>Ursus americanus</i> , associated with <i>Ursicoptes americanus</i> (Acari: <i>Audycaptidae</i> )                                                                | Yunker, Ce<br>Brimmer, Ce<br>Kerans, Jr<br>Beecham, J<br>Schlegel, M                                                                                      | 1980 | Journal of Wildlife Diseases                           | <i>Ursus americanus</i> (American black bear)                                                 | United States of America | Wild Free-Living | 1                                                                                                                                                            | no  | Dermatitis                                                                                                        | Alopecia, chronic lesions,heavy exfoliation, large scales and apparent pruritis                                                                                                                                                                                                                                                                                 | Head, muzzle, neck, thorax, front legs                                                                                     | Mite - ( <i>Ursicoptes americanus</i> )                                                                                                                                                                                                                                                                                   | NA                                                                                                                 | NA                                                                                                                                                     |
| Clinical Picture and Antibody Response to Experimental <i>Sarcoptes scabiei</i> var. <i>vulpes</i> Infection in Red Foxes ( <i>Vulpes vulpes</i> )                                                    | Bornstein, S.<br>Zakrisson, G.<br>Thebo, P.                                                                                                               | 1995 | Acta Veterinaria Scandinavica                          | <i>Vulpes vulpes</i> (red fox)                                                                | Sweden                   | Wild Laboratory  | 3                                                                                                                                                            | no  | Dermatitis                                                                                                        | alopecia, crusts, excoriations, hyperkeratosis, dermatitis, lesions, excematos dermatitis                                                                                                                                                                                                                                                                       | back, thorax, hock, hind leg, shoulder, tail, head                                                                         | Mite - ( <i>Sarcoptes scabiei</i> )                                                                                                                                                                                                                                                                                       | NA                                                                                                                 | sarcoptic mange; red fox; serodiagnosis; ELISA.                                                                                                        |
| Comparison of a cheetah herpesvirus isolate to feline herpesvirus type 1                                                                                                                              | Scherba, G<br>Hajjar, AM<br>Pernikoff, DS<br>Sundberg, JP<br>Basgal, EJ<br>Leon-Monzon, M<br>Nerurkar, L<br>Reichmann, ME                                 | 1988 | Archives of virology                                   | <i>Acinonyx jubatus</i> (cheetah)                                                             | United States of America | Wild Captive     | 3                                                                                                                                                            | yes | severe ulcerative dermatitis                                                                                      | Chronic, multifocal, ulcerative cutaneous lesions                                                                                                                                                                                                                                                                                                               | NA                                                                                                                         | Virus - (Cheetah herpesviruses ChHV)                                                                                                                                                                                                                                                                                      | NA                                                                                                                 | NA                                                                                                                                                     |
| Contagious ecthyma in an adult Dall sheep ( <i>Ovis dalli dalli</i> ) in Alaska                                                                                                                       | Smith, Tc<br>Heimer, We<br>Foreyt, Wj                                                                                                                     | 1982 | Journal of Wildlife Diseases                           | <i>Ovis dalli dalli</i> (Dall sheep)                                                          | United States of America | Wild Free-Living | 1                                                                                                                                                            | no  | Dermatitis                                                                                                        | Numerous sessile, slightly crusted lesions, raised mats                                                                                                                                                                                                                                                                                                         | Thigh, mammary glands and teats                                                                                            | Virus - (Contagious ecthyma (CE), Orf virus)                                                                                                                                                                                                                                                                              | NA                                                                                                                 | NA                                                                                                                                                     |
| Contagious ecthyma in bighorn sheep and mountain goat in western Canada                                                                                                                               | Samuel, Wm<br>Chalmers, Ga<br>Stelfox, Jg<br>Loewen, A<br>Thomsen, Jj                                                                                     | 1975 | Journal of Wildlife Diseases                           | <i>Ovis canadensis canadensis</i> (bighorn sheep), <i>Oreamnos americanus</i> (mountain goat) | Canada                   | Wild Free-Living | 3 (2 sheep,1 goat)                                                                                                                                           | no  | Pustular dermatitis                                                                                               | Severe lesions numerous irregular, confluent, raised, crusted, dark brown to black lesions located along the margins of the lips.                                                                                                                                                                                                                               | Muzzle and lips                                                                                                            | Virus - (Contagious ecthyma (CE), Orf virus)                                                                                                                                                                                                                                                                              | NA                                                                                                                 | NA                                                                                                                                                     |
| Contagious ecthyma in wild thar in the south island                                                                                                                                                   | Kater, Joan C<br>Hansen, Nf                                                                                                                               | 1962 | New Zealand Veterinary Journal                         | <i>Hemitragus jemlahicus</i> (thar)                                                           | New Zealand              | Wild Free-Living | 1                                                                                                                                                            | no  | Pustular dermatitis                                                                                               | Extensive scabby lesions, moist proliferative dermatitis between the digits and extending to the heels                                                                                                                                                                                                                                                          | Lips, nostrils, and feet                                                                                                   | Virus - (Contagious ecthyma (CE), Orf virus)                                                                                                                                                                                                                                                                              | NA                                                                                                                 | NA                                                                                                                                                     |
| Contagious ecthyma, Rangeliferne Brucellosis, and lungworm infection in a Muskox ( <i>Ovibos moschatus</i> ) from the Canadian Arctic, 2014                                                           | Tomaselli, M.<br>Dalton, C.<br>Daigman, P. J.<br>Kutz, S.<br>Van Der Meer, F.<br>Kafle, P.<br>Surujbali, O.<br>Turcotte, C.<br>Checkley, S.               | 2016 | Journal of Wildlife Diseases                           | <i>Ovibos moschatus</i> (muskox)                                                              | Canada                   | Wild Free-Living | 1                                                                                                                                                            | no  | Proliferative dermatitis,                                                                                         | Proliferative dermatitis, contagious ecthyma, or orf (parapoxvirus)                                                                                                                                                                                                                                                                                             | Muzzle and fetlocks                                                                                                        | Virus - (Parapoxvirus)                                                                                                                                                                                                                                                                                                    | NA                                                                                                                 | Brucella suis biovar 4; Parapoxvirus; Protostrongylidae; food safety; food security; public health; wildlife health and disease surveillance; zoonoses |
| Contagious mucocutaneous dermatitis of the mountain hare ( <i>Lepus timidus</i> ): pathology and cause                                                                                                | Suuri, Seppo Am<br>Rudblack, Eeva<br>Niskanen, Mirjami<br>Syrjälä, Paula<br>Nylund, Minna<br>Anttila, Marjukka                                            | 2005 | Journal of wildlife diseases                           | <i>Lepus timidus</i> (mountain hares)                                                         | Finland                  | Wild Free-Living | 53                                                                                                                                                           | no  | Contagious mucocutaneous dermatitis                                                                               | Lesions, necrosis, ulceration and inflammation.                                                                                                                                                                                                                                                                                                                 | Proliferative, crusting lesions of the mucocutaneous junctions of the mouth and nose                                       | Virus - (poxvirus)                                                                                                                                                                                                                                                                                                        | NA                                                                                                                 | Mountain hare, mucocutaneous dermatitis, poxvirus, Staphylococcus warnerii, ulcerative dermatitis                                                      |
| <i>Corynebacterium freneyi</i> bacterial septicaemia secondary to contagious ecthyma in a wild muskox ( <i>Ovibos moschatus</i> )                                                                     | Rothenburger, J. L.<br>Di Francesco, J.<br>Leclerc, L. M.<br>van der Meer, F.<br>Tomaselli, M.<br>Zabek, E.<br>Kutz, S. J.                                | 2021 | Journal of Wildlife Diseases                           | <i>Ovibos moschatus</i> (Wild Muskox)                                                         | Canada                   | Wild Free-living | 1                                                                                                                                                            | yes | Ulcerative and proliferative dermatitis                                                                           | Contagious ecthyma (CE), Orf virus; Necrotizing and proliferative suppurative dermatitis with folliculitis and abscesses                                                                                                                                                                                                                                        | hained skin, lips, and mucocutaneous junction of the muzzle                                                                | Virus - (Parapoxvirus)                                                                                                                                                                                                                                                                                                    | NA                                                                                                                 | NA                                                                                                                                                     |
| Cutaneous Dermatophilosis in a Meadow Jumping Mouse ( <i>Zapus hudsonius</i> )                                                                                                                        | Caron, T. J.<br>Artin, S. C.<br>Israelien, W. J.<br>Holcombe, H. R.<br>Fox, J. G.<br>Bakthavatchali, V.                                                   | 2018 | Comparative Medicine                                   | <i>Zapus hudsonius</i> (meadow jumping mouse)                                                 | United States of America | Wild Captive     | 1                                                                                                                                                            | no  | Exudative and proliferative dermatitis                                                                            | Multilaminated crusts covering the epidermis, extensive scaling of the face, limbs, and tail and severe edema of the paws. Digital hematomas and white scales, scabs, and crusts affecting the majority of nonhaired skin                                                                                                                                       | Face, limbs, tail, paws, skin                                                                                              | Bacteria - ( <i>Dermatophilus congolensis</i> )                                                                                                                                                                                                                                                                           | NA                                                                                                                 | NA                                                                                                                                                     |
| Cutaneous streptothricosis (dermatophiliasis) in owl monkeys                                                                                                                                          | King, Nwj<br>Fraser, Ceo<br>Garcia, Fg<br>Wolf, La<br>Williamson, Martha E                                                                                | 1971 | Laboratory Animal Science                              | <i>Aotus trivirgatus</i> (owl monkey)                                                         | United States of America | Wild Laboratory  | 5                                                                                                                                                            | no  | Proliferative and exudative dermatitis                                                                            | Lesions resembling papillomas, raised, alopecia, wart like masses, brown thick crusts, exudate                                                                                                                                                                                                                                                                  | Face (eyelids, chin, lips), extremities, hind limbs, tail                                                                  | Bacteria - ( <i>Dermatophilus congolensis</i> )                                                                                                                                                                                                                                                                           | NA                                                                                                                 | NA                                                                                                                                                     |
| Cutaneous streptothricosis (dermatophilosis) in a woolly monkey                                                                                                                                       | Fraser, Ceo<br>Garcia, Fg                                                                                                                                 | 1971 | Primate Zoonosis Surveillance                          | <i>Lagothrix lagotricha</i> (woolly monkey)                                                   | United States of America | Wild Captive     | 1                                                                                                                                                            | no  | Dermatitis                                                                                                        | Wart-like skin lesions, dark brown crust, proliferative                                                                                                                                                                                                                                                                                                         | Skin                                                                                                                       | Bacteria - ( <i>Dermatophilus congolensis</i> )                                                                                                                                                                                                                                                                           | NA                                                                                                                 | NA                                                                                                                                                     |
| Cyclic dermatitis associated with <i>Fusarium</i> sp infection in pinnipeds                                                                                                                           | Montali, Richard J<br>Bush, R Mitchell<br>Strandberg, Jd<br>Janssen, Dl<br>Boness, Daryl J<br>Whitla, Joan C                                              | 1981 | Journal of the American Veterinary Medical Association | <i>Zalophus californianus</i> (Californian sea lion), <i>Halichoerus grypus</i> (gray seal)   | United States of America | Wild Captive     | 6 (3 sea lions, 3 seals)                                                                                                                                     | no  | Dermatitis                                                                                                        | Lesions were papular or nodular                                                                                                                                                                                                                                                                                                                                 | Facem trunk, flippers                                                                                                      | Fungus - ( <i>Fusarium</i> sp.)                                                                                                                                                                                                                                                                                           | NA                                                                                                                 | NA                                                                                                                                                     |
| Demodectic mange in a white-tailed deer from Walker County, Texas                                                                                                                                     | Turner, Jc<br>Cano, J                                                                                                                                     | 2014 | Journal of medical entomology                          | <i>Odocoileus virginianus</i> (white-tailed deer)                                             | United States of America | Wild Free-Living | 1                                                                                                                                                            | no  | Exudative dermatitis                                                                                              | Alopecia, dry erythmatous escharotic inflammation, thickened epidermis and dermis, lesions, epilation                                                                                                                                                                                                                                                           | Rump, posterior flanks, withers, neck, chest                                                                               | Mite - ( <i>Demodex</i> sp.)                                                                                                                                                                                                                                                                                              | NA                                                                                                                 | NA                                                                                                                                                     |
| Demodectic mange, dermatophilosis, and other parasitic and bacterial dermatologic diseases in free-ranging white-tailed deer ( <i>Odocoileus virginianus</i> ) in the United States from 1975 to 2012 | Nemeth, N. M.<br>Rader, M. G.<br>Gerhold, R. W.<br>Brown, J. D.<br>Munk, B. A.<br>Oosterle, P. T.<br>Kubiski, S. V.<br>Keel, M. K.                        | 2014 | Veterinary Pathology                                   | <i>Odocoileus virginianus</i> (white-tailed deer)                                             | United States of America | Wild Free-Living | 88 (37 Demodectic mange; 19 Dermatophilosis; 13 dermatitis most commonly with bacteria; all others had different forms of ectoparasites causing dermatitis). | no  | Nodular dermatitis, exudative dermatitis, ulcerative dermatitis, ectoparasite dermatitis, eosinophilic dermatitis | Cases of demodectic mange were defined as those in which animals had gross lesions suggestive of demodicosis (ie, variable alopecia, thickened skin, crusting, scaling, lichenification, or seborrhea). Dermatophilosis identified with gross lesions usually consisted of alopecia with crusting and erythema on the face and ears as well as the distal limbs | 50% of the body, head, neck, limbs, shoulders, flanks, dorsum, ventrum, axillae. Face, ears, limbs.                        | Mite - ( <i>Demodex</i> sp.); Bacteria - ( <i>Dermatophilus congolensis</i> , <i>Arcanobacterium haemolyticum</i> , <i>Staphylococcus</i> and <i>Streptococcus</i> spp); Mites - ( <i>Chorioptes texanus</i> ); Lice - ( <i>Tricholipeurus</i> spp); Ticks ( <i>Amblyomma maculatum</i> and <i>Amblyomma americanum</i> ) | NA                                                                                                                 | Demodex spp, dermatopathology, Dermatophilus congolensis, Odocoileus virginianus, white-tailed deer                                                    |
| Demodicosis in black bears ( <i>Ursus americanus</i> ) from Florida                                                                                                                                   | Forrester, Donald J<br>Spalding, Marilyn G<br>Woodling, John B                                                                                            | 1993 | Journal of Wildlife Diseases                           | <i>Ursus americanus</i> (American black bear)                                                 | United States of America | Wild Free-Living | 5                                                                                                                                                            | no  | Dermatitis                                                                                                        | Severe alopecia, hyperkeratosis, follicular pustules                                                                                                                                                                                                                                                                                                            | Body, face, chest, trunk and limbs                                                                                         | Mite - ( <i>Demodex</i> sp.)                                                                                                                                                                                                                                                                                              | NA                                                                                                                 | Demodicosis, Demodex sp., black bear, Ursus americanus, Florida, case report.                                                                          |
| Demodicosis in chamois ( <i>Rupicapra rupicapra</i> subsp. <i>Rupicapra</i> ) in the Italian Alps, 2013–14                                                                                            | Salvadori, C.<br>Formenti, N.<br>Trog, T.<br>Lanfranchi, P.<br>Papini, R. A.<br>Poli, A.                                                                  | 2016 | Journal of Wildlife Diseases                           | <i>Rupicapra rupicapra</i> (chamois)                                                          | Italy                    | Wild Free-living | 5                                                                                                                                                            | no  | Dermatitis                                                                                                        | moderate crusts, intramural folliculitis,                                                                                                                                                                                                                                                                                                                       | head, trunk                                                                                                                | Mite - ( <i>Demodex</i> sp.)                                                                                                                                                                                                                                                                                              | NA                                                                                                                 | NA                                                                                                                                                     |
| Dermatitis and rhinosinitis caused by <i>Curvularia</i> species in a chinese goral ( <i>Naemorhedus griseus</i> )                                                                                     | Ter Beest, Julia M<br>Garner, Michael M<br>Love, David M<br>Bradway, Daniel S<br>Daniels, Joshua B<br>Surman, Sean T<br>Neiffer, Donald L<br>Ramer, Jan C | 2020 | Journal of Zoo and Wildlife Medicine                   | <i>Naemorhedus griseus</i> (Chinese goral)                                                    | United States of America | Wild Captive     | 1                                                                                                                                                            | yes | Dermatitis                                                                                                        | cutaneous, lesions, pyogranulomatous dermatitis                                                                                                                                                                                                                                                                                                                 | pinnae                                                                                                                     | Fungus - ( <i>Curvularia</i> sp.)                                                                                                                                                                                                                                                                                         | NA                                                                                                                 | Chinese goral, <i>Curvularia</i> sp., dermatiaceous, fungal, <i>Naemorhedus griseus</i> , phaeoptyhmycosis.                                            |
| Dermatitis associated with infestation of a trombiculid mite, <i>Leptotrombidium mitsuiimai</i> , in an Amami Rabbit ( <i>Pentalagus furnessi</i> )                                                   | Kubo, Masahito<br>Suto, Hiroshi<br>Hattori, Shosaku<br>Kuraishi, Takeshi                                                                                  | 2014 | Journal of wildlife diseases                           | <i>Pentalagus furnessi</i> (Amami rabbit)                                                     | Japan                    | Wild Free-Living | 1                                                                                                                                                            | yes | Dermatitis                                                                                                        | Dermatitis with alopecia and excoriation. Epidermis moderately thickened with hyperkeratosis                                                                                                                                                                                                                                                                    | Ventral abdomen, axillary, and inguinal regions                                                                            | Mite ( <i>Leptotrombidium mitsuiimai</i> )                                                                                                                                                                                                                                                                                | NA                                                                                                                 | NA                                                                                                                                                     |
| Dermatitis caused by dermatophilus congolensis in a Zoo Polar Bear ( <i>Ursus maritimus</i> )                                                                                                         | Eo, K. Y.<br>Kwon, O. D.                                                                                                                                  | 2014 | Pakistan Veterinary Journal                            | <i>Ursus maritimus</i> (polar Bear)                                                           | South Korea              | Wild Captive     | 1                                                                                                                                                            | no  | Dermatitis                                                                                                        | Severe exudative dermatitis with thick scab formation, matted hair, thickening of the skin, crust formation                                                                                                                                                                                                                                                     | Face and whole body                                                                                                        | Bacteria - ( <i>Dermatophilus congolensis</i> )                                                                                                                                                                                                                                                                           | NA                                                                                                                 | Dermatitis Dermatophilus congolensis Polar bear                                                                                                        |

|                                                                                                                                                                                                     |                                                                                                                                                                                                        |      |                                                         |                                                                                                                                                                   |                          |                                |                                                           |     |                          |                                                                                                                                                                                             |                                                                                                                                                 |                                                 |                                                                                                                     |                                                                                                                                                                                      |
|-----------------------------------------------------------------------------------------------------------------------------------------------------------------------------------------------------|--------------------------------------------------------------------------------------------------------------------------------------------------------------------------------------------------------|------|---------------------------------------------------------|-------------------------------------------------------------------------------------------------------------------------------------------------------------------|--------------------------|--------------------------------|-----------------------------------------------------------|-----|--------------------------|---------------------------------------------------------------------------------------------------------------------------------------------------------------------------------------------|-------------------------------------------------------------------------------------------------------------------------------------------------|-------------------------------------------------|---------------------------------------------------------------------------------------------------------------------|--------------------------------------------------------------------------------------------------------------------------------------------------------------------------------------|
| Dermatitis caused by <i>Dermatophilus congolensis</i> in polar bears ( <i>Thalarcos maritimus</i> )                                                                                                 | Smith, Cf                                                                                                                                                                                              | 1973 | Veterinary Record                                       | <i>Thalarcos maritimus</i> (Polar bear)*[ <i>Ursus maritimus</i> ]                                                                                                | New Zealand              | Wild Captive                   | 2                                                         | no  | Dermatitis               | Skin debris                                                                                                                                                                                 | Skin                                                                                                                                            | Bacteria - ( <i>Dermatophilus congolensis</i> ) | NA                                                                                                                  | NA                                                                                                                                                                                   |
| Dermatitis caused by Filaria taxideae in a lesser panda                                                                                                                                             | Gardiner, Ch<br>Loomis, Mr<br>Britt, Jr Jo<br>Montali, Rj                                                                                                                                              | 1983 | Journal of the American Veterinary Medical Association  | <i>Ailurus fulgens</i> (lesser panda)                                                                                                                             | United States of America | Wild Captive                   | 1                                                         | no  | Dermatitis               | Alopecia, hyperkeratotic, skin lesions with pus-filled subcutaneous abscesses                                                                                                               | Back, left shoulder, thorax, scrotum                                                                                                            | Nematode - ( <i>Filaria taxideae</i> )          | NA                                                                                                                  | NA                                                                                                                                                                                   |
| Dermatitis caused by group G beta-hemolytic Streptococcus in Nile hippos ( <i>Hippopotamus amphibius</i> )                                                                                          | Clyde, VL<br>Wallace, RS<br>Pocknell, AM                                                                                                                                                               | 1998 | American Association Of Zoo Veterinarians               | <i>Hippopotamus amphibius</i> (Nile hippopotamus)                                                                                                                 | United States of America | Wild Captive                   | 3                                                         | no  | Dermatitis               | cracking, wounds, lesions, suppurative, multifocal epidermitis, severe hyperkeratosis and multifocal parakeratosis                                                                          | nose, flanks, shoulders, face limbs, trunk, mandible                                                                                            | NA                                              | The dermatitis in these cases is likely the result of opportunistic infection of skin lesions by normal skin flora. | NA                                                                                                                                                                                   |
| Dermatitis caused by <i>Malassezia pachydermatis</i> in a California sea lion ( <i>Zalophus californianus</i> )                                                                                     | Chernette, R                                                                                                                                                                                           | 1998 | The Veterinary Record                                   | <i>Zalophus californianus</i> (Californian sea lion)                                                                                                              | France                   | Wild Captive                   | 1                                                         | no  | Focal Dermatitis         | Cutaneous lesions, wheals, orthokeratotic hyperkeratosis of the epidermis                                                                                                                   | Flanks and chest                                                                                                                                | Fungus - ( <i>Malassezia pachydermatis</i> )    | NA                                                                                                                  | NA                                                                                                                                                                                   |
| Dermatitis in free-living common brushtail possums ( <i>Trichosurus vulpecula</i> )                                                                                                                 | Hemsley, S<br>Canfield, Pj                                                                                                                                                                             | 1994 | Australian Veterinary Practioner                        | <i>Trichosurus vulpecula</i> (common brushtail possum)                                                                                                            | Australia                | Wild Free-Living, Wild Captive | 6 (1 wildcaptive)                                         | no  | Dermatitis               | Exuditive, alopecia, scab formation, ulceration, puritic lesions, thickening of the epidermins                                                                                              | Hip, tail, lumbar, thighs, head, forelimbs, flanks, ears, lips                                                                                  | NA                                              | NA                                                                                                                  | NA                                                                                                                                                                                   |
| Dermatitis in seals caused by <i>D. congolensis</i>                                                                                                                                                 | Frese, K<br>Weber, A                                                                                                                                                                                   | 1971 | Berliner und Münchener Tierärztliche Wochenschrift      | <i>Otaria byronia</i> (South American sea lion)                                                                                                                   | Germany                  | Wild Captive                   | 2                                                         | no  | Dermatitis               | Eczematous skin, lesions, ruffled hair                                                                                                                                                      | head, neck, limbs                                                                                                                               | Bacteria - ( <i>Dermatophilus congolensis</i> ) | NA                                                                                                                  |                                                                                                                                                                                      |
| Dermatitis in the black rhinoceros ( <i>Diceros bicornis</i> ) due to filariasis                                                                                                                    | Schulz, KCA<br>Kluge, EB                                                                                                                                                                               | 1960 | Journal of the South African Veterinary Association     | <i>Diceros bicornis</i> (Black Rhinoceros)                                                                                                                        | South Africa             | Wild Free-living               | 1                                                         | no  | Dermatitis               | lesions, ulcerative wounds, exfoliation, erosions, pustule and crust formation, ulceration and haemorrhage                                                                                  | shoulders,                                                                                                                                      | Nematode - (unknown)                            | NA                                                                                                                  | NA                                                                                                                                                                                   |
| Dermatologic investigation of alopecia in rhesus macaques ( <i>Macaca mulatta</i> )                                                                                                                 | Steinmetz, Hanspeter W<br>Kammanns, Werner<br>Dix, Iona<br>Neimeier, Karl-Albrecht<br>Kaup, Franz-Josef                                                                                                | 2005 | Journal of Zoo and Wildlife Medicine                    | <i>Macaca mulatta</i> (Rhesus macaques)                                                                                                                           | Germany                  | Wild Laboratory                | 183                                                       | no  | Dermatits                | Mild epidermal hyperkeratosis and mild perivascular dermatitis                                                                                                                              | Back and extremities were most commonly affected                                                                                                | NA                                              | NA                                                                                                                  | Rhesus monkey, <i>Macaca mulatta</i> , hair loss, alopecia                                                                                                                           |
| Dermatopathy in captive hippopotamus ( <i>Hippopotamus amphibious</i> )                                                                                                                             | Helnick, Ke<br>Rush, Em<br>Ogburn, Al<br>Trupkiewicz, Jg<br>Garner, M                                                                                                                                  | 2007 | Proc. Am. Assoc. Zoo Vet. Pg                            | <i>Hippopotamus amphibius</i> (Nile hippopotamus)                                                                                                                 | United States of America | Wild Captive                   | 3                                                         | no  | Ulcerative dermatitis    | Crackling, peeling, or vesicle lesions, ulcers which drain blood, serum or purulent material                                                                                                | Neck, limbs, thorax, and abdomen, dorsum, toes, and peritrical region.                                                                          | NA                                              | Bacteria and Fungus                                                                                                 | NA                                                                                                                                                                                   |
| Dermatophilosis (Cutaneous streptothricosis) in Kafue lechwe ( <i>Kobus lechwe kafuensis</i> )                                                                                                      | Pandey, G. S.<br>Mweene, A.<br>Suzuki, A. K.<br>Nambota, A.<br>Kaji, T.                                                                                                                                | 1994 | Journal of Wildlife Diseases                            | <i>Kobus lechwe kafuensis</i> (Kafue lechwe)                                                                                                                      | Zambia                   | Wild Free-Living               | 2                                                         | no  | Exudative dermatitis     | Thickening of the skin, crusts, and nodfule formation                                                                                                                                       | Most of the body                                                                                                                                | Bacteria - ( <i>Dermatophilus congolensis</i> ) | NA                                                                                                                  | <i>Dermatophilus congolensis</i> , Kafue lechwe, <i>Kobus lechwe kafuensis</i> , Zambia                                                                                              |
| Dermatophilosis (cutaneous streptothricosis) in owl monkeys                                                                                                                                         | Fox, Jg<br>Campbell, Lh<br>Reed, C<br>Snyder, Sb<br>Soave, Oa                                                                                                                                          | 1973 | Journal of the American Veterinary Medical Association  | <i>Aotus trivirgatus</i> (owl monkey)                                                                                                                             | United States of America | Wild Captive                   | 5                                                         | no  | Ulcerative dermatitis    | Lesions, crusts, ulceration, alopecia, papillomatous whitish brown lesions, alopecia, exudate, debris                                                                                       | Head, eyelids, ear, mouth                                                                                                                       | Bacteria - ( <i>Dermatophilus congolensis</i> ) | NA                                                                                                                  | NA                                                                                                                                                                                   |
| Dermatophilosis among wild raccoons in New York State                                                                                                                                               | Sulkin, If<br>Gordon, Ma<br>Stone, Wb                                                                                                                                                                  | 1976 | Journal of the American Veterinary Medical Association  | <i>Procyon lotor</i> (Raccoons)                                                                                                                                   | United States of America | Wild Free-Living               | 8                                                         | no  | Dermatits                | Encrusted lesions                                                                                                                                                                           | Eyes, snout, tarsal and carpal regions                                                                                                          | Bacteria - ( <i>Dermatophilus congolensis</i> ) | NA                                                                                                                  | NA                                                                                                                                                                                   |
| Dermatophilosis in a mule deer, <i>Odocoileus hemionus (Rafinesque)</i> , from Wyoming                                                                                                              | Williams, Elizabeth S<br>Pier, Ac<br>Wilson, Roger W                                                                                                                                                   | 1984 | Journal of wildlife diseases                            | <i>Odocoileus hemionus</i> (mule deer)                                                                                                                            | United States of America | Wild Free-Living               | 3                                                         | no  | Exudative dermatitis     | Scabs and exudative crusts, ulcerative skin                                                                                                                                                 | Skin of ears, chin, axilla                                                                                                                      | Bacteria - ( <i>Dermatophilus congolensis</i> ) | NA                                                                                                                  | NA                                                                                                                                                                                   |
| Dermatophilosis in owl monkeys                                                                                                                                                                      | Meclure, Hm<br>Kaplan, W<br>Bonner, Wb<br>Keeling, Me                                                                                                                                                  | 1971 | Sabouraudia: Journal of Medical and Veterinary Mycology | <i>Aotus trivirgatus</i> (owl monkey), <i>Macaca mulatta</i> (Rhesus monkey), <i>Macaca fascicularis</i> (cynomolgus), <i>Saimiri sciureus</i> (squirrel monkeys) | United States of America | Wild Captive, Wild Laboratory  | 8 (2 of each species, wild captive are the 2 owl monkeys) | no  | Exudative dermatitis     | Exudative lesions, crusts, scales, alopecia, thick brown crusts                                                                                                                             | Legs, tail, back, ears, arms, head                                                                                                              | Bacteria - ( <i>Dermatophilus congolensis</i> ) | NA                                                                                                                  | NA                                                                                                                                                                                   |
| Dermatophilosis in two polar bears                                                                                                                                                                  | Newman, Ms<br>Cook, Rw<br>Appelhof, Wk<br>Kitchen, H                                                                                                                                                   | 1975 | Journal of the American Veterinary Medical Association  | <i>Thalarcos maritimus</i> (Polar bear)*[ <i>Ursus maritimus</i> ]                                                                                                | United States of America | Wild Captive                   | 2                                                         | no  | Dermatitis               | Yellowing of hair, greasiness, pruritus, encrustation of skin, lesions, scab, exudate and necrotic debris                                                                                   | Skin, trunk, face                                                                                                                               | Bacteria - ( <i>Dermatophilus congolensis</i> ) | NA                                                                                                                  | NA                                                                                                                                                                                   |
| Dermatophilosis of alpine chamois ( <i>Rupicapra rupicapra</i> ) in Italy                                                                                                                           | De Meneghi, Daniele<br>Ferroglio, Ezio<br>Bollo, Enrico<br>Leon Vaccaro, L<br>Morscio, A<br>Rossi, Luca                                                                                                | 2002 | Schweizer Archiv für Tierheilkunde                      | <i>Rupicapra rupicapra</i> (chamois)                                                                                                                              | Italy                    | Wild Free-living               | 2                                                         | no  | Proliferative dermatitis | crusted lesions, scab, hair loss, scaliness and scabs,                                                                                                                                      | leg, nose,                                                                                                                                      | Bacteria - ( <i>Dermatophilus congolensis</i> ) | NA                                                                                                                  | <i>Dermatophilus congolensis</i> , chamois ( <i>Rupicapra rupicapra</i> ), strawberry footrot, dermatophilosis, Italian Alps                                                         |
| Dermatophilus congolensis infections in wildlife in New York State                                                                                                                                  | Salkin, If<br>Stone, Wb<br>Gordon, Ma                                                                                                                                                                  | 1981 | Journal of clinical microbiology                        | <i>Mephitis mephitis</i> (striped skunk), <i>Marmota monax</i> (woodchuck), <i>Procyon lotor</i> (raccoon)                                                        | United States of America | Wild Free-Living               | 3 (1 of each sp)                                          | no  | Exudative dermatitis     | Crusts, scales, alopecia, lesions                                                                                                                                                           | Skunk - axillae, wrists, ankles, digits<br>woodchuck - head, neck, legs, feet, abdomen, back<br>raccoon - eyes, snout, neck, hocks, sides, legs | Bacteria - ( <i>Dermatophilus congolensis</i> ) | NA                                                                                                                  | NA                                                                                                                                                                                   |
| Dermatophilus dermatitis enzootic in deer in New York State and vicinity                                                                                                                            | Gordon, Ma<br>Salkin, If<br>Stone, Wb                                                                                                                                                                  | 1977 | Journal of wildlife diseases                            | <i>Odocoileus virginianus</i> (white-tailed deer)                                                                                                                 | United States of America | Wild Free-Living               | 15                                                        | no  | Dermatitis               | Portions of skin bearing crusts or scabs, eroded or denuded areas of skin, pustules and detached scabs.                                                                                     | Ears                                                                                                                                            | Bacteria - ( <i>Dermatophilus congolensis</i> ) | NA                                                                                                                  | NA                                                                                                                                                                                   |
| Dermatophilus infection in Columbian Ground Squirrels ( <i>Citellus columbianus columbianus</i> )                                                                                                   | Wobeser, G<br>Gordon, Ma                                                                                                                                                                               | 1969 | Bulletin of the Wildlife Disease Association            | <i>Urociellus columbianus columbianus</i> (Columbian ground squirrels)                                                                                            | Canada                   | Wild Free-Living               | 2                                                         | no  | Dermatitis               | Skin lesions, thick crusts, keratinized skin, scabs, alopecia                                                                                                                               | Nose, cheeks, hind legs, perineal region                                                                                                        | Bacteria - ( <i>Dermatophilus congolensis</i> ) | NA                                                                                                                  | NA                                                                                                                                                                                   |
| Dermatophytosis caused by Trichophyton mentagrophytes in the Southern Chamois ( <i>Rupicapra pyrenaica</i> ) in the Eastern Pyrenees                                                                | Marco, I.<br>Lopez-Olvera, J. R.<br>Gibert, P.<br>Abarca, L.<br>Gauthier, D.<br>Lavin, S.                                                                                                              | 2007 | Zoonoses and Public Health                              | <i>Rupicapra pyrenaica</i> (Pyrenean chamois)                                                                                                                     | France, Spain            | Wild Free-living               | 2                                                         | no  | Dermatitis               | alopecia, scalling, crusting skin lesions                                                                                                                                                   | Dorsum and hind limbs, horns, eyes, nose, tail, sternum                                                                                         | Fungus - ( <i>Trichophyton mentagrophytes</i> ) | NA                                                                                                                  | NA                                                                                                                                                                                   |
| Detection of Dichelobacter nodosus in wild ungulates ( <i>Capra ibex ibex</i> and <i>Ovis aries musimon</i> ) and domestic sheep suffering from foot rot using a two-step polymerase chain reaction | Belloy, Luc<br>Giacometti, Marco<br>Boujon, Patrick<br>Waldvogel, Andreas                                                                                                                              | 2007 | Journal of Wildlife Diseases                            | <i>Capra ibex ibex</i> (Alpine ibex)                                                                                                                              | Switzerland              | Wild Free-living               | 25                                                        | no  | Exudative dermatitis     | lesions, pododermatitis, exudative dermatitis, multifocal sole ulcers, foot rot                                                                                                             | feet                                                                                                                                            | Bacteria - ( <i>Dichelobacter nodosus</i> )     | NA                                                                                                                  | <i>Capra ibex ibex</i> , <i>Dichelobacter nodosus</i> , foot rot, mouflon, <i>Ovis aries musimon</i> , PCR, wild ungulates                                                           |
| Detection of mecC-Positive Staphylococcus aureus (CC130-MRSA-XI) in Diseased European Hedgehogs ( <i>Erinaceus europaeus</i> ) in Sweden                                                            | Monecke, S.<br>Gavner-Widen, D.<br>Mattsson, R.<br>Rangstrup-Christensen, L.<br>Lazaris, A.<br>Coleman, D. C.<br>Shore, A. C.<br>Ehricht, R.                                                           | 2013 | Plos One                                                | <i>Erinaceus europaeus</i> (European hedgehog)                                                                                                                    | Sweden                   | Wild Free-Living               | 1                                                         | no  | Diffuse dermatitis       | Thickening of the skin and prominent crusts affecting mostly skin areas free of spine. Skin lesions included ulcerations and formation of serocellular crusts                               | Areas free of spines                                                                                                                            | Bacteria - ( <i>Staphylococcus aureus</i> )     | NA                                                                                                                  | Hedgehogs, <i>Staphylococcus aureus</i> , Methicillin-resistant <i>Staphylococcus aureus</i> , <i>Staphylococcus</i> , Polymerase chain reaction, Wildlife, Microarrays, Neutrophils |
| Development of a case definition for clinical feline herpesvirus infection in cheetahs ( <i>Acinonyx jubatus</i> ) housed in zoos                                                                   | Witte, Carmel L.<br>Lamberski, Nadine<br>Rideout, Bruce A<br>Fields, Victoria<br>Teare, Cyd<br>Shields<br>Barrie, Michael<br>Haelele, Holly<br>Junge, Randall<br>Murray, Suzan<br>Hungerford, Laura L. | 2013 | Journal of Zoo and Wildlife Medicine                    | <i>Acinonyx jubatus</i> (cheetah)                                                                                                                                 | United States of America | Wild Captive                   | 21                                                        | yes | dermatitis               | skin lesions, dermatitis                                                                                                                                                                    | lesions on the face, legs, tail, and inside the mouth                                                                                           | Virus - feline herpesvirus (FHV)                | NA                                                                                                                  | <i>Acinonyx jubatus</i> , case definition, cheetah, epidemiology, feline herpesvirus, upper respiratory disease                                                                      |
| Diagnosis and treatment of Neospora caninum-associated dermatitis in a red fox ( <i>Vulpes vulpes</i> ) with concurrent Toxoplasma gondii infection                                                 | Dubey, Jiender P<br>Whitesell, Leah E<br>Culp, William E<br>Daye, Sharon                                                                                                                               | 2014 | Journal of Zoo and Wildlife Medicine                    | <i>Vulpes vulpes</i> (red fox)                                                                                                                                    | United States of America | Wild Captive                   | 1                                                         | no  | Neosporosis dermatitis   | Generalized crusty plaques resembling mange, skin lesions with many intralesional protoxoaal tachyzoites, neosporosis, granulomatous dermatitis, hyperkeratosis with neutrophilic crusting. | Body, face, chest, trunk and limbs                                                                                                              | Protozoa - ( <i>Neospora caninum</i> )          | NA                                                                                                                  | NA                                                                                                                                                                                   |



|                                                                                                                                                                                            |                                                                                                                                                                      |      |                                                        |                                                                                                     |                          |                  |                                                                                                           |     |                                      |                                                                                                                                                                                                                                                                                               |                                                                                                                                                                                   |                                                                                             |                                                                              |                                                                                                                                                                         |
|--------------------------------------------------------------------------------------------------------------------------------------------------------------------------------------------|----------------------------------------------------------------------------------------------------------------------------------------------------------------------|------|--------------------------------------------------------|-----------------------------------------------------------------------------------------------------|--------------------------|------------------|-----------------------------------------------------------------------------------------------------------|-----|--------------------------------------|-----------------------------------------------------------------------------------------------------------------------------------------------------------------------------------------------------------------------------------------------------------------------------------------------|-----------------------------------------------------------------------------------------------------------------------------------------------------------------------------------|---------------------------------------------------------------------------------------------|------------------------------------------------------------------------------|-------------------------------------------------------------------------------------------------------------------------------------------------------------------------|
| Diseases diagnosed in red foxes from the southeastern United States                                                                                                                        | Little, Susan E<br>Davidson, William R<br>Howarth, Elizabeth W<br>Rakich, Pauline M<br>Nettles, Victor F                                                             | 1998 | Journal of wildlife diseases                           | <i>Vulpes vulpes</i> (red fox)                                                                      | United States of America | Wild Free-living | 33                                                                                                        | no  | Dermatitis                           | severe dermatitis, gross lesion was diffuse, marked hyperkeratosis and alopecia with severe dermal lichenification. Hyperkeratotic dermatitis                                                                                                                                                 | NA                                                                                                                                                                                | Mite - ( <i>Sarcoptes scabiei</i> )                                                         | NA                                                                           | Disease, mortality factors, red fox, sarcoptic mange, survey, vulpes vulpes                                                                                             |
| Diseases in free-ranging bats from Germany                                                                                                                                                 | Mühlendorfer, Kristin<br>Speck, Stephanie<br>Wibbelt, Gudrun                                                                                                         | 2011 | BMC Veterinary Research                                | Vespertilionidae (bat family)                                                                       | Germany                  | Wild Free-living | 7                                                                                                         | yes | Dermatitis                           | moderate purulent dermatitis, focal ulcerative necrotizing dermatitis                                                                                                                                                                                                                         | skin                                                                                                                                                                              | NA                                                                                          | 2 mixed bacterial, and/or bacterial-fungus; 5 had unknown origin             | NA                                                                                                                                                                      |
| Dual infection of a white-tailed deer by <i>Dermatophilus congolensis</i> and <i>Alternaria alternata</i>                                                                                  | Salkin, If<br>Gordon, Ma<br>Stone, Wb                                                                                                                                | 1975 | Journal of the American Veterinary Medical Association | <i>Odocoileus virginianus</i> (white-tailed deer)                                                   | United States of America | Wild Free-Living | 1                                                                                                         | no  | Exudative dermatitis                 | Encrusted lesions, scaling and alopecia                                                                                                                                                                                                                                                       | Hocks, flanks, back, ears, eyes, torso                                                                                                                                            | Bacteria - ( <i>Dermatophilus congolensis</i> ), & Fungus - ( <i>Alternaria alternata</i> ) | NA                                                                           | NA                                                                                                                                                                      |
| Ear mange mites ( <i>Notoedres muris</i> ) in black and Norway rats ( <i>Rattus rattus</i> and <i>Rattus norvegicus</i> ) from inner-city Vancouver, Canada                                | Anholt, H.<br>Himsworth, C.<br>Rothenburger, J.<br>Proctor, H.<br>Patrick, D. M.                                                                                     | 2014 | Journal of Wildlife Diseases                           | <i>Rattus rattus</i> (black rat), <i>Rattus norvegicus</i> (Norway rat)                             | Canada                   | Wild Free-living | 15 (13 <i>Rattus rattus</i> , 2 <i>Rattus norvegicus</i> )                                                | no  | Proliferative dermatitis             | exhibited epidermal hyperplasia and hyperkeratosis with intracorneal pustules and mild lymphoplasmacytic dermatitis                                                                                                                                                                           | ears, face, legs, tail                                                                                                                                                            | Mite - ( <i>Notoedres muris</i> )                                                           | NA                                                                           | Ecology, ear mange, <i>Notoedres muris</i> , <i>Rattus</i> , urban.                                                                                                     |
| Ectoparasitic dermatitis in free-ranging swamp wallabies ( <i>Wallabia bicolor</i> ) in New South Wales                                                                                    | Portas, T. J.<br>Crowley, A.<br>Hufschmid, J.                                                                                                                        | 2009 | Australian Veterinary Journal                          | <i>Wallabia bicolor</i> (swamp wallaby)                                                             | Australia                | Wild Captive     | 3                                                                                                         | no  | Ectoparasitic dermatitis             | Extensive dermatological lesions, alopecia and hyperkeratosis of the pinnae and tail, patchy alopecia over the thorax and abdomen and large symmetrical areas of alopecia and hyperkeratosis adjacent to the tail base. additionally each animal had localised crusting, alopecia and papules | Pinnae and tail, patchy alopecia over the thorax and abdomen and large symmetrical areas of alopecia and hyperkeratosis adjacent to the tail base, thighs and the inguinal region | Louse - ( <i>Heterodoxus ulalabai</i> )                                                     | NA                                                                           | dermatology; Diabloticoptes; Heterodoxus ulalabai; lice; mites; swamp wallaby                                                                                           |
| Effects of Habitat, Host Sex and Age on the Parasites of <i>Trichosurus Caninus</i> (Marsupialia: Phalangeridae) in North-Eastern New South Wales                                          | Presidente, Pja<br>Barnett, JI<br>How, Ra<br>Humphreys, Wf                                                                                                           | 1982 | Australian journal of zoology                          | <i>Trichosurus caninus</i> (Short-eared possum), <i>Trichosurus vulpecula</i> (brush-tailed possum) | Australia                | Wild Free-Living | 56 <i>T. caninus</i> ; 3 <i>T. vulpecula</i>                                                              | no  | Focal Dermatitis                     | Lesions, oedema, scar or scab formation at tick attachment sites                                                                                                                                                                                                                              | Scrotum, pouch, mandible, ears                                                                                                                                                    | Tick - ( <i>Ixodes spp.</i> )                                                               | NA                                                                           | NA                                                                                                                                                                      |
| Efficacy of in-feed formulation ivermectin against psoroptes sp in bighorn sheep                                                                                                           | Foreyt, W. J.                                                                                                                                                        | 1993 | Journal of Wildlife Diseases                           | <i>Ovis canadensis canadensis</i> (bighorn sheep)                                                   | United States of America | Wild Laboratory  | 2                                                                                                         | no  | Exudative dermatitis                 | Psoroptic mange, alopecia, and exudative dermatitis with scabs                                                                                                                                                                                                                                | Ears, face and neck.                                                                                                                                                              | Mite ( <i>Psoroptes sp</i> )                                                                | NA                                                                           | Psoroptes sp., psoroptic mange, scabies, drug trial, ivermectin, Rocky Mountain bighorn sheep, Ovis canadensis canadensis, experimental infestation.                    |
| The emergence of squirrelpox in Ireland                                                                                                                                                    | McInnes, CJ<br>Coulter, L<br>Daglish, Mp<br>Deane, D<br>Gilray, J<br>Percival, A<br>Willoughby, K<br>Scantlebury, M<br>Marks, N<br>Graham, D                         | 2013 | Animal Conservation                                    | <i>Sciurus vulgaris</i> (red squirrels)                                                             | Northern Ireland         | Wild Free-Living | 2                                                                                                         | yes | Exudative dermatitis                 | Gross lesions, severe dermatitis, scab, alopecia, ulceration of the epidermis                                                                                                                                                                                                                 | Eyelids, footpads, chin                                                                                                                                                           | Virus - (squirrelpox)                                                                       | NA                                                                           | squirrelpox; SQPV: grey squirrels; red squirrels; Ireland.                                                                                                              |
| Epidemiological and postmortem findings in 262 red squirrels ( <i>Sciurus vulgaris</i> ) in Scotland, 2005 to 2009                                                                         | Larose, Jp<br>Meredith, Al<br>Everest, Dj<br>Fiegnu, C<br>McInnes, CJ<br>Shaw, Dj<br>Milne, Em                                                                       | 2010 | Veterinary Record                                      | <i>Sciurus vulgaris</i> (red squirrels)                                                             | Scotland                 | Wild Free-Living | 33                                                                                                        | yes | Exudative dermatitis                 | Ulceration, scab formation                                                                                                                                                                                                                                                                    | Feet, face, ventrum                                                                                                                                                               | Virus - (squirrelpox)                                                                       | NA                                                                           | NA                                                                                                                                                                      |
| Epidemiology of clinical feline herpesvirus infection in zoo-housed cheetahs ( <i>Acinonyx jubatus</i> )                                                                                   | Witte, C. L.<br>Lambertski, N.<br>Rideout, B. A.<br>Vaida, F.<br>Clitno, S. B.<br>Barrie, M. T.<br>Haeefele, H. J.<br>Junge, R. E.<br>Murray, S.<br>Hungeford, L. L. | 2017 | Journal of the American Veterinary Medical Association | <i>Acinonyx jubatus</i> (cheetah)                                                                   | United States of America | Wild Captive     | 50                                                                                                        | yes | Dermatitis                           | Crusted or scabbed skin ulcers, dermatitis, or skin lesions                                                                                                                                                                                                                                   | Limited to areas of ocular and salivary secretion and where cheetahs commonly lick themselves [eg. forelimbs]                                                                     | Virus - (Clinical feline herpesvirus (FHV))                                                 | NA                                                                           | NA                                                                                                                                                                      |
| An epizootic of besnoitiosis in captive caribou ( <i>Rangifer tarandus caribou</i> ), reindeer ( <i>rangifer tarandus tarandus</i> ) and mule deer ( <i>odocoileus hemionus hemionus</i> ) | Glover, G. J.<br>Svendrowski, M.<br>Cawthorn, R. J.                                                                                                                  | 1990 | Journal of Wildlife Diseases                           | <i>Rangifer tarandus caribou</i> (caribou); <i>Odocoileus hemionus hemionus</i> (mule deer)         | Canada                   | Wild Captive     | 31 [23 - <i>Rangifer tarandus caribou</i> (caribou); 8 - <i>Odocoileus hemionus hemionus</i> (mule deer)] | no  | Dermatitis                           | mild thickening with slight superficial scaling to marked thickening associated with hyperpigmentation, fissuring and epidermal ulceration with serous exudation and crust formation. Severe generalized exudative dermatitis. Skin lesions, cysts                                            | distal extremities, eyelids, skin and lips, face, legs                                                                                                                            | Apicomplexan - ( <i>Besnoitia sp.</i> )                                                     | NA                                                                           | Besnoitia sp., besnoitiosis, caribou, reindeer, mule deer, Rangifer tarandus caribou, Rangifer tarandus tarandus, Odocoileus hemionus hemionus, epidemic, insect vector |
| Eradication of a tropical rat mite ( <i>Ornithonyssus bacoti</i> ) infestation from a captive colony of endangered amargosa voles ( <i>Microtus californicus scirpensis</i> )              | Mantovani, S.<br>Allan, N.<br>Pesapane, R.<br>Brignolo, L.<br>Foley, J.                                                                                              | 2018 | Journal of Zoo and Wildlife Medicine                   | <i>Microtus californicus scirpensis</i> (Amargosa vole)                                             | United States of America | Wild Captive     | 29                                                                                                        | yes | Ulcerative pleocellular dermatitis   | Round, gross, skin leasions 0.5 to 1 cm in diameter, with raised, reddened edges and central ulceration, focal trovise and mild, diffuse ulcerative pleocellular dermatitis                                                                                                                   | Cervical and scapular regions                                                                                                                                                     | Mite - ( <i>Ornithonyssus bacoti</i> )                                                      | NA                                                                           | Amargosa vole; Microtus californicus scirpensis; Ornithonyssus bacoti; captive wildlife; selamectin; tropical rat mite                                                  |
| Erythema multiforme in a spotted hyena ( <i>Crocuta crocuta</i> )                                                                                                                          | Hanley, Christopher S<br>Simmons, Heather A<br>Wallace, Roberta S<br>Clyde, Victoria L                                                                               | 2005 | Journal of Zoo and Wildlife Medicine                   | <i>Crocuta crocuta</i> (Spotted hyena)                                                              | United States of America | Wild Captive     | 1                                                                                                         | no  | Dermatitis                           | acute, severe erythematous and ulcerative dermatitis                                                                                                                                                                                                                                          | hindquarters, feet, face, and ears                                                                                                                                                | NA                                                                                          | either the vaccine or amoxicillin the potential cause of erythema multiforme | Erythema multiforme, spotted hyena, Crocuta crocuta, drug reaction, canine distemper vaccine, canary pox vaccine.                                                       |
| Exfoliative dermatitis in the Indian rhinoceros ( <i>Rhinoceros unicornis</i> ), with description of a new species: Pityrosporum pachydermatitis                                           | Weidman, FD                                                                                                                                                          | 1925 | Zoological Society of Philadelphia, PA                 | <i>Rhinoceros unicornis</i> (Indian rhinoceros); <i>Diceros bicornis</i> (Black Rhinoceros)         | United States of America | Wild Captive     | 3 (2 <i>R. unicornis</i> ; 1 <i>D. bicornis</i> )                                                         | no  | Exfoliative dermatitis               | flaking skin, superficially fissured, scaling, rusty brown skin, pitting, dermatitis exfoliativa, generalized, marked exfoliation of scales, dry, inflammation, ulcers, pustular                                                                                                              | hide of back, flanks, body, legs, ears, head                                                                                                                                      | <i>R. unicornis</i> : Fungus - (Potentially - <i>Pityrosporum pachydermatitis</i> )         | <i>D. bicornis</i> : unknown                                                 | NA                                                                                                                                                                      |
| Experimental deepox infection in black-tailed deer ( <i>Odocoileus hemionus columbianus</i> )                                                                                              | Bildfeldt, R. J.<br>Thompson, K. A.<br>Moerdyk-Schauwecker, M.<br>Jin, L.<br>Wolff, P. L.<br>Gillin, C. M.                                                           | 2010 | Journal of Wildlife Diseases                           | <i>Odocoileus hemionus columbianus</i> (black-tailed deer)                                          | United States of America | Wild Captive     | 7                                                                                                         | no  | Dermatitis                           | multifocal poxviral cutaneous lesions of erythema, papules, pustules, ulceration, and crusting                                                                                                                                                                                                | ears, neck, mouth                                                                                                                                                                 | Virus - ( <i>Cervidpoxvirus</i> )                                                           | NA                                                                           | NA                                                                                                                                                                      |
| Experimental infection of red foxes ( <i>Vulpes vulpes</i> ) with <i>Sarcoptes scabiei</i> var. vulpes                                                                                     | Mörner, Torsten<br>Christensson, Dan                                                                                                                                 | 1984 | Veterinary Parasitology                                | <i>Vulpes vulpes</i> (red fox)                                                                      | Sweden                   | Wild Laboratory  | 1                                                                                                         | no  | Dermatitis                           | alopecia, moderate dermatitis                                                                                                                                                                                                                                                                 | back, tail, hindquarter skin                                                                                                                                                      | Mite - ( <i>Sarcoptes scabiei</i> )                                                         | NA                                                                           | NA                                                                                                                                                                      |
| Experimental parapoxvirus infection (contagious ecthyma) in semi-domesticated reindeer ( <i>Rangifer tarandus tarandus</i> )                                                               | Tryland, M.<br>Klein, J.<br>Berger, T.<br>Jøsefsen, T. D.<br>Das Neves, C. G.<br>Oksanen, A.<br>Asbakk, K.                                                           | 2013 | Veterinary Microbiology                                | <i>Rangifer tarandus tarandus</i> (mountain reindeer)                                               | Norway                   | Wild Laboratory  | 14                                                                                                        | no  | Contagious pustular dermatitis       | Contagious ecthyma, small white lesions proliferative dermatitis with epidermal hyperplasia, hyperkeratosis, intra-epithelial pustules and ulcer, multiple proliferative and coalescing lesions in the oral mucosa.                                                                           | Mouth                                                                                                                                                                             | Virus - ( <i>parapoxvirus</i> )                                                             | NA                                                                           | Contagious ecthyma, Experimental infection, Orf, Parapoxvirus, Poxvirus, Reindeer, Wildlife                                                                             |
| Fatal anemia and dermatitis in captive agoutis ( <i>Dasyprocta mexicana</i> ) infested with <i>Echidnophaga</i> fleas                                                                      | Cucchi-Stefanoni, Karina<br>Juan-Siles, Carlos<br>Parris, Alberto<br>Garner, Michael M                                                                               | 2008 | Veterinary Parasitology                                | <i>Dasyprocta mexicana</i> (agoutis)                                                                | Mexico                   | Wild Captive     | 3                                                                                                         | no  | Hyperplastic perivascular dermatitis | Cutaneous thickening, lesions, alopecia, puritis, ulcers                                                                                                                                                                                                                                      | Dorsal, flank, eyelid                                                                                                                                                             | Fleas - ( <i>Echidnophaga sp.</i> )                                                         | NA                                                                           | agouti, anemia, cardiomegaly, hepatocellular necrosis, dermatitis, Echidnophaga, flea., hypersensitivity, rodent                                                        |
| Filarial dermatitis in a striped skunk                                                                                                                                                     | Suito, Emi K<br>Little, Susan E                                                                                                                                      | 1997 | Journal of Wildlife Diseases                           | <i>Mephitis mephitis</i> (striped skunk)                                                            | United States of America | Wild Free-Living | 1                                                                                                         | no  | Diffuse dermatitis                   | Alopecia, thickening of the skin, multiple cutaneous abscesses                                                                                                                                                                                                                                | Dorsal aspect of head, neck and trunk.                                                                                                                                            | Nematodes ( <i>Filaria taxideae</i> )                                                       | NA                                                                           | dermatitis, Filaria taxideae, mephitis mephitis, striped skunk                                                                                                          |
| <i>Filaria taxideae</i> in striped skunks ( <i>Mephitis mephitis</i> ) of Colorado, USA, and commonly associated filarial dermatitis                                                       | Fox, K. A.<br>Martin, L. E. R.<br>Baeten, L. A.<br>Webb, B. T.<br>LeVan, I. K.<br>Ballweber, L. R.<br>Wolfe, L. L.                                                   | 2013 | Journal of Wildlife Diseases                           | <i>Mephitis mephitis</i> (striped skunk)                                                            | United States of America | Wild Free-living | 4                                                                                                         | no  | Dermatitis                           | hyperkeratosis, skin thickening, inflammation, hemorrhage, crusting, ulceration, lesions                                                                                                                                                                                                      | skin                                                                                                                                                                              | Nematodes ( <i>Filaria taxideae</i> )                                                       | NA                                                                           | NA                                                                                                                                                                      |
| First cases of squirrelpox in red squirrels ( <i>Sciurus vulgaris</i> ) in Scotland                                                                                                        | McInnes, CJ<br>Coulter, L<br>Daglish, Mp<br>Fiegnu, C<br>Gilray, J<br>Willoughby, K<br>Cole, M<br>Milne, E<br>Meredith, A<br>Everest, Dj                             | 2009 | Veterinary Record                                      | <i>Sciurus vulgaris</i> (red squirrels)                                                             | Scotland                 | Wild Free-Living | 4                                                                                                         | yes | Exudative dermatitis                 | Skin lesions, scabs, ulcers                                                                                                                                                                                                                                                                   | Head, feet, prepuce                                                                                                                                                               | Virus - (squirrelpox)                                                                       | NA                                                                           | NA                                                                                                                                                                      |

|                                                                                                                                                                        |                                                                                                                                                           |      |                                                        |                                                                                                                                   |                          |                                |                                               |     |                               |                                                                                                                                                                                                                                  |                                                                                                              |                                                                                                                  |                                   |                                                                                                                                                          |
|------------------------------------------------------------------------------------------------------------------------------------------------------------------------|-----------------------------------------------------------------------------------------------------------------------------------------------------------|------|--------------------------------------------------------|-----------------------------------------------------------------------------------------------------------------------------------|--------------------------|--------------------------------|-----------------------------------------------|-----|-------------------------------|----------------------------------------------------------------------------------------------------------------------------------------------------------------------------------------------------------------------------------|--------------------------------------------------------------------------------------------------------------|------------------------------------------------------------------------------------------------------------------|-----------------------------------|----------------------------------------------------------------------------------------------------------------------------------------------------------|
| First report of acariasis by Caparinia tripilis in African hedgehogs ( <i>Aelerix albiventris</i> ), in Costa Rica                                                     | Moreira-Soto, Andres Troyo, Adriana Calderón-Arguedas, Olger                                                                                              | 2013 | Revista brasileira de parasitologia veterinaria        | <i>Aelerix albiventris</i> (African hedgehog)                                                                                     | Costa rica               | Wild Captive                   | 2                                             | no  | Pruritic dermatitis (mange)   | chronic pruritic dermatitis, scabs, nearly complete loss of spines, alopecia                                                                                                                                                     | periorbital region, lateral surfaces of the head, the flanks, hind and fore limbs, abdominal area, and rump. | Mite - ( <i>Caparinia tripilis</i> )                                                                             | NA                                | Erinaceidae, ectoparasites, mange, Psoroptidae, Central America, African hedgehog.                                                                       |
| The first report of massive infestation with <i>Lipoptena Cervi</i> (Diptera: Hippoboscidae) in Roe Deer ( <i>Capreolus Capreolus</i> ) in Iasi county, N-E of Romania | Lazar, M. Jacob, O. C. Solcan, C. Pasca, S. A. Lazar, R. Boisteau, P. C.                                                                                  | 2017 | Arquivo Brasileiro De Medicina Veterinaria E Zootecnia | <i>Capreolus capreolus</i> (roe deer)                                                                                             | Romania                  | Wild Free-living               | 4                                             | no  | Dermatitis                    | dermatitis, alopecia, hemorrhages                                                                                                                                                                                                | face, head, neck, lateral body parts, abdominal regions, inguinal, perianal, body                            | Diptera - ( <i>Lipoptena cervi</i> )                                                                             | NA                                | roe deer, Lipoptena cervi, SEM , histopathology, Iasi county                                                                                             |
| First report of straelensiosis in red foxes ( <i>Vulpes vulpes</i> )                                                                                                   | Sargo, Roberto F. J. Mota, Stephanie M. Loureiro, Filipa R. F. Sousa, Luis M. C. Silva, Filipe C. Prada, Justina                                          | 2020 | Veterinary Dermatology                                 | <i>Vulpes vulpes</i> s (red fox)                                                                                                  | Portugal                 | Wild Free-living               | 3                                             | no  | Nodular dermatitis            | nonpuritic cutaneous papules                                                                                                                                                                                                     | head, neck, limbs, trunk                                                                                     | Mite - ( <i>Straelensia cynotis</i> )                                                                            | NA                                | NA                                                                                                                                                       |
| Foot health and prevalence of Dichelobacter nodosus in 11 ungulate species at Berne Animal Park                                                                        | Hoby, S. Steiner, A. Kuhnert, P. Jost, R. Furtado Guthruf, S. Schoenbaechler, K. Alsaod, M.                                                               | 2020 | Schweizer Archiv Fur Tierheilkunde                     | <i>Bison bonasus</i> (European bison)                                                                                             | Switzerland              | Wild Captive                   | 9                                             | no  | Dermatitis                    | unknown agent, bison. Mange in alpaca                                                                                                                                                                                            | fore and hind limbs                                                                                          | NA, Mite - ( <i>Chorioptes</i> sp)                                                                               | NA                                | Captive wild and domestic ungulates, Dichelobacter nodosus, Foot health, PCR, Lameness                                                                   |
| Foot Lesions in farmed mink ( <i>Neovison vison</i> )pathologic and epidemiologic characteristics on 4 Danish farms                                                    | Jespersen, A. Hammer, A. S. Jensen, H. E. Bonde-Jensen, N. Lassus, M. M. Agger, J. F. Larsen, P. F.                                                       | 2016 | Veterinary Pathology                                   | <i>Neovison vison</i> (Mink)                                                                                                      | Denmark                  | Wild Captive                   | 520                                           | no  | Pododermatitis                | lesions, hair loss, crusting, hyperkeratosis, ulcerative lesions, pyogranulomatous dermatitis, Fununculosis and granulomatous dermatitis                                                                                         | feet                                                                                                         | NA                                                                                                               | Potential hair follicle infection | callus, dermatitis, foot, hyperkeratosis, mink, planter, skin, trichogranuloma                                                                           |
| Fungal dermatitis in captive pinnipeds                                                                                                                                 | Pollock, Christal G Rohrbach, Barton Ramsay, Edward C                                                                                                     | 2000 | Journal of Zoo and Wildlife Medicine                   | <i>halichoerus grypus</i> (gray seals), <i>Phoca vitulina</i> (harbor seals), <i>Zalophus californianus</i> (California sea lion) | United States of America | Wild Captive                   | 8 (2 gray seals, 4 harbor seals, 2 sea lions) | no  | Fungal dermatitis             | Erythematous, thickened, alopecic skin lesions                                                                                                                                                                                   | Face and on the flippers, particularly around the nail bed                                                   | Fungus ( <i>Trichophyton mentagrophytes</i> , <i>Malassezia</i> spp., and <i>Yarrowia (Candida) lipolytica</i> ) | NA                                | Gray seal, Phoca vitulina, harbor seal, Halichoerus grypus, sea lion, Zalophus californianus, fungal dermatitis.                                         |
| Generalized demodicosis in three sibling juvenile rock hyraxes ( <i>Procavia capensis</i> )                                                                            | Sturgeon, Ginger Suedmeyer, William Mertins, James Garner, Michael                                                                                        | 2010 | Journal of Zoo and Wildlife Medicine                   | <i>Procavia capensis</i> (rock hyraxes)                                                                                           | United States of America | Wild Captive                   | 3                                             | no  | dermatitis                    | severe generalized dermatitis, nonpuritic, nonalopecic, mildly encrusted, focally ulcerated pustular nodules                                                                                                                     | dorsum, limbs, and dorsal cranium                                                                            | Mite - (Demodex sp.)                                                                                             | NA                                | Demodex, doranectin, mite, Procavia capensis, rock hyrax                                                                                                 |
| Genetic characterization of orf viruses isolated from various ruminant species of a zoo                                                                                | Guo, J Rasmussen, J Wüschmann, Arno De La Concha-Bermejillo, A                                                                                            | 2004 | Veterinary microbiology                                | <i>Oribos moschatus</i> (muskox), <i>Budorcas taxicolor tibetanus</i> (Sichuan takin)                                             | United States of America | Wild Captive                   | 8 Muskox, 2 Sichuan takin                     | no  | Proliferative dermatitis      | Skin lesions muskox - severe, persistent, multifocal, proliferative, cauliflower like sichuan takin - mild, transient, focal , wart like, ulcers                                                                                 | Skin, muzzels and lip, eyes, nose                                                                            | Virus - (parapoxvirus)                                                                                           | NA                                | Orf virus (ORFV), Bovine papular stomatitis virus (BPSV), Pesudocowpox virus (PCPV), Musk ox, sichuan takin, shetland sheep                              |
| Genetic epidemiology and pathology of racoon-derived Sarcopes mites from urban areas of Germany                                                                        | Renteria-Solis, Z. Min, A. M. Alasaad, S. Müller, K. Michler, F.-U. Schmischke, R. Witsnatt, U. Rossi, L. Wibbelt, G.                                     | 2014 | Medical and Veterinary Entomology                      | <i>Procyon lotor</i> (Raccoons)                                                                                                   | Germany                  | Wild Free-living               | 1                                             | no  | Proliferative dermatitis      | severe proliferative dermatitis and alopecia                                                                                                                                                                                     | gluteal regions, thighs, knees                                                                               | Mite - ( <i>Sarcoptes scabiei</i> )                                                                              | NA                                | Sarcoptes scabiei, microsatellites, pathology, raccoon, wildlife                                                                                         |
| Haematological, serum biochemical and serological features of platypuses with and without mycotic granulomatous dermatitis                                             | Connolly, Jh Obendorf, DI                                                                                                                                 | 1999 | Australian Veterinary Journal                          | <i>Ornithorhynchus anatinus</i> (platypus)                                                                                        | Australia                | Wild Free-Living               | 13                                            | no  | Granulomatous dermatitis      | Ulcerative skin lesions                                                                                                                                                                                                          | Tail, body                                                                                                   | Fungus - ( <i>Macror amphibiorum</i> )                                                                           | NA                                | Platypus, Macror amphibiorum, dermatitis, haematology, serum biochemistry, ELISA                                                                         |
| Hair-loss epizootic in moose ( <i>Alces alces</i> ) associated with massive deer ked ( <i>Lipoptena cervi</i> ) infestation                                            | Geraghty, Dominic P. Griffiths, Joshua Stewart, Niall Robertson, Iain K. Gust, Nick                                                                       | 2011 | Journal of Wildlife Diseases                           | <i>Alces alces</i> (Moose)                                                                                                        | Norway                   | Wild Free-living               | 1                                             | no  | Dermatitis                    | alopecia, acute to chronic, multifocal to coalescing, eosinophilic to lymphocytic dermatitis                                                                                                                                     | cheeks, neck, thorax abdomen                                                                                 | Diperta - ( <i>Lipoptena cervi</i> )                                                                             | NA                                | <i>Alces alces</i> , climate, deer ked, dermatitis, hair loss, <i>Lipoptena cervi</i> , population density, pathology.                                   |
| Hair-loss syndrome in black-tailed deer of the Pacific Northwest                                                                                                       | Bildfell, Robert J Mertins, James W Mortenson, Jack A Cottam, Doug F                                                                                      | 2004 | Journal of Wildlife Diseases                           | <i>Odocoileus hemionus columbianus</i> (black-tailed deer)                                                                        | United States of America | Wild Free-Living               | 1                                             | no  | Dermatitis                    | Ulcer, hyperkeratosis, crusts                                                                                                                                                                                                    | Ears                                                                                                         | NA                                                                                                               | Louse                             | Alopecia, Columbian black-tailed deer, Damalina (Cervicola), Demodex odocoilei, hair loss, lice, Odocoileus hemionus columbianus, parasites, pediculosis |
| Health evaluation of free-ranging and captive pichis ( <i>Zaedyus pichis</i> ) : Mammalia, Dasypodidae), in Mendoza Province, Argentina.                               | Superina, M. Garner, M. M. Aguilur, R. F.                                                                                                                 | 2009 | Journal of Wildlife Diseases                           | <i>Zaedyus pichis</i> (pichi)                                                                                                     | Argentina                | Wild Free-Living, Wild Captive | 45 (39 free-living, 6 Wild captive)           | yes | Hypersensitivity dermatitis   | Microscopic lesions                                                                                                                                                                                                              | Skin                                                                                                         | NA                                                                                                               | Environmental                     | Besnoitia, histopathology, parasitology, pathology, serology, Trypanosoma cruzi, wildlife health.                                                        |
| Health evaluation of free-ranging eastern bettongs ( <i>Bettongia gaimardi</i> ) during translocation for reintroduction in australia                                  | Portas, Timothy Fletcher, Don Spratt, David Reiss, Andrea Holz, Peter Stalker, Kathryn Devlin, Joanne Taylor, David Dobroszczyk, David Manning, Adrian D. | 2014 | Journal of Wildlife Diseases                           | <i>Bettongia gaimardi</i> (bettong)                                                                                               | Australia                | Wild Free-living               | 7                                             | yes | dermatitis                    | Mild to moderate alopecia. Gross lesions included alopecia, diffuse erythema, and multifocal scaling, crusting, pustules, and ulceration. Irregular acanthosis, hyperkeratosis superficial pustules, and parakeratotic crusting. | both hind limbs from the back to the inguinal area                                                           | NA                                                                                                               | Potentially mites, unknown sp.    | Bettongia gaimardi, eastern bettong, health evaluation, herpesvirus, parasite, toxoplasmosis, translocation.                                             |
| Hepatotoxicity and secondary photosensitization in a red kangaroo ( <i>Megaleia rufus</i> ) due to ingestion of Lantana camara                                         | Johnson, J. H. Jensen, J. M.                                                                                                                              | 1998 | Journal of Zoo and Wildlife Medicine                   | <i>Megaleia rufus</i> (Red kangaroo)* [ <i>Macropus rufus</i> ]                                                                   | United States of America | Wild Captive                   | 2                                             | no  | Exudative dermatitis          | Crusty black exudate, exudative lesions                                                                                                                                                                                          | Ear margins, eyelids, muzzle, and scrotum and opacity of the corneas                                         | Plant Matter - ( <i>Lantana camara</i> )                                                                         | NA                                | Photosensitization, red kangaroo, Megaleia rufus, Lantana camara                                                                                         |
| High morbidity cutaneous enzootic myiasis by Dermatobia hominis (Diptera: Oestridae) in sambar deer ( <i>Rusa unicolor</i> )                                           | Pereira, A. H. B. Carrão, D. L. Balhazar, D. A. Rocha, B. S. de Araújo, J. L. Córdas, S. A. Ubiali, D. G.                                                 | 2020 | Parasitology Research                                  | <i>Rusa unicolor</i> (sambar deer)                                                                                                | Brazil                   | Wild Captive                   | 8                                             | yes | Dermatitis                    | Eosinophilic and granulomatous chronic active severe necrohemorrhagic dermatitis                                                                                                                                                 | skin                                                                                                         | Diptera - ( <i>Dermatobia hominis</i> )                                                                          | NA                                | Wildlife medicine . Oestridae . Enzootic cutaneous myiasis . Oral ivermectin . Dermatobia hominis                                                        |
| Histopathology and risk factors associated with <i>Neotrombicula microti</i> infestation in the endangered amargosa vole ( <i>Microtus californicus</i> )              | Ott-Conn, C. N. Woods, L. W. Clifford, D. L. Branson, T. Foley, J.                                                                                        | 2015 | Journal of Wildlife Diseases                           | <i>Microtus californicus</i> (Amargosa vole)                                                                                      | United States of America | Wild Free-living               | 22                                            | yes | Auricular dermatitis          | Severe granulocytic and necrotizing dermatitis                                                                                                                                                                                   | ears, genitalia, chin                                                                                        | Mite - ( <i>Neotrombicula microti</i> )                                                                          | NA                                | Amargosa vole, auricular dermatitis, chiggers, Microtus californicus scirpensis, Neotrombicula microti, trombiculasis.                                   |
| Histopathologic studies on mucosal and cutaneous lesions in contagious papular dermatitis of Japanese serow ( <i>Capricornis crispus</i> )                             | Okada, Hm Okada, K Numakunai, S Ohshima, K                                                                                                                | 1984 | The Japanese Journal of Veterinary Science             | <i>Capricornis crispus</i> (Japanese serow)                                                                                       | Japan                    | Wild Captive, Wild Free-Living | 14 (7 wild captive, 7 free-living)            | no  | Contagious papular dermatitis | Papular lesions, necrosis, scabs                                                                                                                                                                                                 | Lips, muzzle, face, eyelids, udder, feet                                                                     | Virus - (parapoxvirus)                                                                                           | NA                                | contagious papular dermatitis, Japanese serow                                                                                                            |
| Hyperplastic dermatitis associated with acariasis in a siamang ( <i>Symphalangus syndactylus</i> )                                                                     | Atkins, Adrienne Heard, Darryl J Mertins, James W Kimbro, Jason Greiner, Ellis C                                                                          | 2008 | Journal of zoo and wildlife medicine                   | <i>Symphalangus syndactylus</i> (siamang)                                                                                         | United States of America | Wild Captive                   | 2                                             | no  | Hyperplastic dermatitis       | Mange, pruritis, patchy alopecia, and scaly thickened skin                                                                                                                                                                       | Face, abdomen, arms                                                                                          | Mite ( <i>Psorobia</i> spp. )                                                                                    | NA.                               | Hylobates syndactylus, Symphalangus syndactylus, Psorergates cercopithec, psorergatic mange, Psorobia, siamang                                           |

|                                                                                                                                                                                                                                     |                                                                                                                                         |      |                                                        |                                                                                                                                               |                              |                  |                                                                                     |     |                                   |                                                                                                                                                                                                                                                                                       |                                                                                                                                                      |                                                                   |                                                                                                                            |                                                                                                                                                           |
|-------------------------------------------------------------------------------------------------------------------------------------------------------------------------------------------------------------------------------------|-----------------------------------------------------------------------------------------------------------------------------------------|------|--------------------------------------------------------|-----------------------------------------------------------------------------------------------------------------------------------------------|------------------------------|------------------|-------------------------------------------------------------------------------------|-----|-----------------------------------|---------------------------------------------------------------------------------------------------------------------------------------------------------------------------------------------------------------------------------------------------------------------------------------|------------------------------------------------------------------------------------------------------------------------------------------------------|-------------------------------------------------------------------|----------------------------------------------------------------------------------------------------------------------------|-----------------------------------------------------------------------------------------------------------------------------------------------------------|
| Identifying maintenance hosts for infection with <i>Dichelobacter nodosus</i> in free-ranging wild ruminants in Switzerland: A prevalence study                                                                                     | Moore-Jones, Guia Arduser, Flurin Duerr, Salome Brawand, Stefanie Gobel, Steiner, Adrian Zanolari, Patrik Rysler-Degorgis, Marie-Pierre | 2020 | Plos One                                               | <i>Capra ibex ibex</i> (Alpine ibex)                                                                                                          | Switzerland                  | Wild Free-living | 1                                                                                   | yes | Dermatitis                        | lesions, ulcerative interdigital pododermatitis                                                                                                                                                                                                                                       | hind feet                                                                                                                                            | Bacteria - ( <i>Dichelobacter nodosus</i> )                       | NA                                                                                                                         | NA                                                                                                                                                        |
| Immune-mediated interface dermatitis in a rhesus macaque                                                                                                                                                                            | Makaron, L. Smith, K. Bailey, C. Kaliyaperumal, S. Miller, A. Kramer, J.                                                                | 2012 | Journal of Medical Primatology                         | <i>Macaca mulatta</i> (Rhesus macaques)                                                                                                       | United States of America     | Wild Laboratory  | 1                                                                                   | no  | Dermatitis                        | palmoplantar hyperkeratosis, deep ulcers, fissures                                                                                                                                                                                                                                    | hands and feet, axillary regions                                                                                                                     | NA                                                                | Psychogenic                                                                                                                | NA                                                                                                                                                        |
| Inguinal and axillary dermatitis in wallabies in north Queensland due to the demanyssid mite <i>Thadeua serrata</i>                                                                                                                 | Sterratt, Lf Beveridge, I Johnson, Pm                                                                                                   | 2007 | Australian veterinary journal                          | <i>Petrogale persephone</i> (Proserpine rock wallaby), <i>Macropus dorsalis</i> (black-striped wallaby)                                       | Australia                    | Wild Free-Living | 9 (6 rock wallabies, 3 black-striped wallabies)                                     | no  | Dermatitis                        | Lesions, hyperkeratotic epidermis                                                                                                                                                                                                                                                     | Inguinal and axillary skin                                                                                                                           | mite - ( <i>Thadeua serrata</i> )                                 | NA                                                                                                                         | NA                                                                                                                                                        |
| Isolation of digital dermatitis treponemes from hoof lesions in wild North American elk ( <i>Cervus elaphus</i> ) in Washington State, USA                                                                                          | Clegg, S. R. Mansfield, K. G. Newbrook, K. Sullivan, L. E. Blowsy, R. W. Carter, S. D. Evans, N. J.                                     | 2015 | Journal of Clinical Microbiology                       | <i>Cervus elaphus</i> (American elk)                                                                                                          | United States of America     | Wild Free-Living | 7                                                                                   | no  | Digital dermatitis                | Grossly, affected elk have deformed hooves that are asymmetrical, markedly elongated, and curved or broken or with sloughed horn. Erosive lesions at the coronary band, undern horn of the wall and sole                                                                              | Hooves/elk feet                                                                                                                                      | Bacteria ( <i>Treponema spp.</i> )                                | NA.                                                                                                                        | NA                                                                                                                                                        |
| Isolation of <i>Staphylococcus simulans</i> from dermatitis in a captive African pygmy hedgehog                                                                                                                                     | Han, Jae-Ik Lee, Sook-Jin Jung, Hye-Jin Kim, Jeong-Ho Na, Ki-Jeong                                                                      | 2011 | Journal of zoo and wildlife medicine                   | <i>Erinaceus albiiventris</i> (African pygmy hedgehog)                                                                                        | United States of America     | Wild Captive     | 1                                                                                   | no  | Dermatitis                        | Hyperkeratosis, alopecia, lesions, erythema, exudation, and pinpoint hemorrhages were observed in the lesion                                                                                                                                                                          | Back of hedgehog                                                                                                                                     | NA                                                                | Bacteria - ( <i>Staphylococcus simulans</i> )                                                                              | Alopecia, dermatitis, hedgehog, 16S rRNA gene, <i>Staphylococcus simulans</i> .                                                                           |
| Leprosy in red squirrels in Scotland                                                                                                                                                                                                | Meredith, Anna Del Pozo, Jorge Smith, Sionagh Milne, Elspeth Stevenson, Karen McLuckie, Joyce                                           | 2014 | Veterinary Record                                      | <i>Sciurus vulgaris</i> (red squirrels)                                                                                                       | Scotland                     | Wild Free-Living | 6                                                                                   | yes | Dermatitis                        | Alopecia, cutaneous swelling, granulomatous dermatitis                                                                                                                                                                                                                                | Snout, lips, eyelids, pinnae, distal aspect of limbs                                                                                                 | Bacteria - ( <i>Mycobacterium lepromatosis</i> )                  | NA                                                                                                                         | NA                                                                                                                                                        |
| Lesions associated with infestation of a yellow-footed rock wallaby ( <i>Petrogale xanthopus xanthopus</i> ) with larvae of <i>Odontacarus</i> ( <i>Leogoninus adelaidae</i> (Womersley)(Acarina: Trombiculidae) in South Australia | O'Callaghan, Michael G Carmichael, Ian H Finnie, John W Conaghty, Sue                                                                   | 1994 | Journal of Wildlife Diseases                           | <i>Petrogale xanthopus xanthopus</i> (yellow-footed rock wallaby)                                                                             | Australia                    | Wild Free-Living | 1                                                                                   | no  | Pustular dermatitis               | Extensive, moist, pustular dermatitis, hyperkeratosis epidermis                                                                                                                                                                                                                       | Inguinal, abdominal and axillary regions.                                                                                                            | Mite - ( <i>Odontacarus adelaidae</i> )                           | NA                                                                                                                         | Odon taca rus adelaidae, Trombiculidae, Leeuwenhookiinae, chiggers, dermatitis, yellow-footed rock wallaby, Petrogale xanthopus xanthopus.                |
| Malassezia pachydermatitis isolated from a South American sea lion ( <i>Otaria byronia</i> ) with dermatitis                                                                                                                        | Nakagaki, Kazuhide Hata, Kunihiko Iwata, Eri Takeo, Kanji                                                                               | 2000 | Journal of Veterinary Medical Science                  | <i>Otaria byronia</i> (South American sea lion)                                                                                               | Japan                        | Wild Captive     | 1                                                                                   | no  | Dermatitis                        | Cutaneous specimens                                                                                                                                                                                                                                                                   | NA                                                                                                                                                   | Fungus ( <i>Malassezia pachydermatitis</i> )                      | NA                                                                                                                         | Malassezia pachydermatitis, Otaria byronia, protoplasmic membrane, ultrastructure                                                                         |
| Marine debris in harbour porpoises and seals from German waters                                                                                                                                                                     | Unger, B. Herr, H. Benke, H. Boehner, M. Burkhardt-Holm, P. Daehne, M. Hillmann, M. Wolff-Schmidt, K. Wohlsein, P. Siebert, U.          | 2017 | Marine Environmental Research                          | <i>Phoca vitulina</i> (harbour seal), <i>Halichoerus grypus</i> (grey seal)                                                                   | Germany                      | Wild Free-living | 5 [3 <i>Phoca vitulina</i> (harbour seal); 2 <i>Halichoerus grypus</i> (grey seal)] | yes | Ulcerative dermatitis             | suppurative ulcerative dermatitis, lesions                                                                                                                                                                                                                                            | neck                                                                                                                                                 | NA                                                                | Sea debris - intralesional marine debris indicating that the debris represents the most likely cause of the tissue damage. | Pollution effects, Pollutant burden, Environmental, impact, Fishing gear, North Sea, Baltic Sea, Harbour porpoise, Harbour seal, Grey seal, Health status |
| The morphology and pathology of Besnoitia sp. in reindeer ( <i>Rangifer tarandus tarandus</i> )                                                                                                                                     | Ayroud, M. Leighton, F. A. Tessaro, S. V.                                                                                               | 1995 | Journal of Wildlife Diseases                           | <i>Rangifer tarandus tarandus</i> (mountain reindeer)                                                                                         | Canada                       | Wild Captive     | 4                                                                                   | no  | Dermatitis                        | alopecia, mild thickening and encrustation of skin.                                                                                                                                                                                                                                   | carpal, tarsal                                                                                                                                       | Apicomplexan - ( <i>Besnoitia sp.</i> )                           | NA                                                                                                                         | Reindeer, Rangifer tarandus tarandus, Besnoitia, protozoa, pathology, ultrastructure, life cycle, cat.                                                    |
| Molecular detection of pseudogymnoascus destructans (Ascomycota: Pseudotrunculaceae) and unidentified fungal dermatitides on big brown bats ( <i>Eptesicus fuscus</i> ) overwintering inside buildings in Canada                    | McAlpine, D. F. McBurney, S. Sabine, M. Vanderwolf, K. J. Park, A. Cai, H. Y.                                                           | 2016 | Journal of Wildlife Diseases                           | <i>Eptesicus fuscus</i> (big brown bats)                                                                                                      | Canada                       | Wild Free-living | 2                                                                                   | yes | Dermatitis                        | mild, focal, pustular, fungal dermatitis, lesions                                                                                                                                                                                                                                     | muzzle                                                                                                                                               | NA                                                                | unidentified ascomycetes.                                                                                                  | Big brown bat, Eptesicus fuscus, fungal infection, Pseudogymnoascus destructans, white-nose syndrome.                                                     |
| Mortalities, amyloidosis and other diseases in free-living red squirrels ( <i>Sciurus vulgaris</i> ) on Jersey, Channel Islands                                                                                                     | Blackett, T. A. Simpson, V. R. Haugland, S. Everest, D. J. Muir, C. F. Smith, K. C. Mill, A. C.                                         | 2018 | Veterinary record                                      | <i>Sciurus vulgaris</i> (red squirrels)                                                                                                       | Bailiwick of Jersey          | Wild Free-Living | 49                                                                                  | yes | Exudative dermatitis              | Lesions morphologically consistent with those of exudative, pustular dermatitis accompanying alopecia and sloughing of the digital and/or metacarpal pads with necrosis of the digits                                                                                                 | Gross lesions were typically seen around the mouth, nose and on the feet occasionally on the eyelids and more infrequently on the scrotum and pinnae | NA                                                                | Bacetria - ( <i>Staphylococcus aureus</i> )                                                                                | disease surveillance; histopathology; squirrels                                                                                                           |
| Mortality in red squirrels ( <i>Sciurus vulgaris</i> ) associated with exudative dermatitis                                                                                                                                         | Simpson, V. R. Hargreaves, J. Everest, D. J. Baker, A. S. Booth, P. A. Butler, H. M. Blackett, T.                                       | 2010 | Veterinary record                                      | <i>Sciurus vulgaris</i> (red squirrels)                                                                                                       | England, Bailiwick of Jersey | Wild Free-Living | 11                                                                                  | yes | Exudative dermatitis              | Exudative, ulcerative dermatitis and superficial staphylococcal pyoderma, gross lesions, dry scabby lesions                                                                                                                                                                           | Lips, eyelids and feet                                                                                                                               | NA                                                                | NA                                                                                                                         | NA                                                                                                                                                        |
| Mycotic dermatitis in a vagrant parti-coloured bat ( <i>Vesperugo murinus</i> ) in Great Britain                                                                                                                                    | Barlow, Alex Julliffe, Tracey Tomlin, Mike Worledge, Lisa Miller, Helen                                                                 | 2011 | Veterinary Record                                      | <i>Vesperugo murinus</i> (parti-coloured bat)                                                                                                 | Scotland                     | Wild Free-Living | 1                                                                                   | yes | Necrotising dermatitis            | Several small white lesions were seen on the wing membranes. Acute focal necrotising dermatitis with intralesional fungal elementsamorphous eosinophilic material permeated by fungal hyphae and fruiting bodies associated with a marginal band of isophilic leucocytoclastic debris | Wing membrane                                                                                                                                        | Fungus - ( <i>Cladosporium spp.</i> and <i>Rhodotorula spp.</i> ) | NA                                                                                                                         | NA                                                                                                                                                        |
| Mycotic dermatitis in an Atlantic white-sided dolphin, a pygmy sperm whale, and two harbor seals                                                                                                                                    | Frasca, Jr S Dunn, JI Cooke, Jc Buck, Jd                                                                                                | 1996 | Journal of the American Veterinary Medical Association | <i>Phoca vitulina</i> (harbor seal)                                                                                                           | United States of America     | Wild Free-Living | 2                                                                                   | no  | Mycotic dermatitis                | Raised, firm, erythematous, cutaneous nodules                                                                                                                                                                                                                                         | Heads, trunks, caudal portions                                                                                                                       | Fungus - ( <i>Fusarium spp.</i> )                                 | NA                                                                                                                         | NA                                                                                                                                                        |
| Naturally occurring cutaneous streptothricosis in a cottontail rabbit                                                                                                                                                               | Shotts, Emmett Bookor Kistner, Theodore P                                                                                               | 1970 | Journal of the American Veterinary Medical Association | <i>Sylvilagus floridanus</i> (cottontail rabbit)                                                                                              | United States of America     | Wild Free-Living | 2                                                                                   | no  | Mycotic dermatitis                | Lesions, dry purulent material, irritated skin, fibrinopurulent exudate, necrotic debris                                                                                                                                                                                              | Feet, footpads, leg, anus and urethra, muzzle                                                                                                        | Bacteria - ( <i>Dermatophilus congolensis</i> )                   | NA                                                                                                                         | NA                                                                                                                                                        |
| New records of hair follicle mites (Demodicidae) from North American Cervidae                                                                                                                                                       | Desch, Clifford E Andrews, John J Baeten, Laurie A Holder, Zach Powers, Jenny G Weber, Duane Balwheer, Lora R                           | 2010 | Journal of Wildlife Diseases                           | <i>Odocoileus hemionus</i> (mule deer), <i>Cervus elaphus nelsoni</i> (Rocky Mountain elk), <i>Odocoileus virginianus</i> (white-tailed deer) | United States of America     | Wild Free-Living | 3 (1 of each study species)                                                         | no  | Nodular dermatitis                | Alopecia, lesions, inflammation, nodular dermatitis                                                                                                                                                                                                                                   | Abdomen, hind quarters, shoulders, carpi, hocks,                                                                                                     | Mite - ( <i>Demodex katzert</i> )                                 | NA                                                                                                                         | Cervus elaphus, Demodex katzert, Demodex odocoilei, ectoparasites, host specificity, Odocoileus hemionus, Odocoileus virginianus, synhospitalic.          |
| Notodreic mange in gray squirrels ( <i>Sciurus carolinensis</i> )                                                                                                                                                                   | Carlson, BI Rober, Dp Nielsen, Sw                                                                                                       | 1982 | Journal of Wildlife Diseases                           | <i>Sciurus carolinensis</i> (gray squirrel)                                                                                                   | United States of America     | Wild Free-Living | 7                                                                                   | no  | Dermatitis                        | Alopecia, skin thicken and wrinkled, thick yellow crusts                                                                                                                                                                                                                              | Head, neck, upper torso, tail                                                                                                                        | Mite - ( <i>Notodres sp.</i> )                                    | NA                                                                                                                         | NA                                                                                                                                                        |
| A novel poxvirus lethal to red squirrels ( <i>Sciurus vulgaris</i> )                                                                                                                                                                | Thomas, Kathryn Tompkins, Daniel M Sainsbury, Anthony W Wood, Ann R Dalziel, Robert Nettleton, Peter F McInnes, Colin J                 | 2003 | Journal of General Virology                            | <i>Sciurus vulgaris</i> (red squirrels)                                                                                                       | England                      | Wild Laboratory  | 2                                                                                   | yes | Dermatitis                        | Severe secondary lesions, scabs                                                                                                                                                                                                                                                       | Face, feet, hands                                                                                                                                    | Virus - (parapoxvirus)                                            | NA                                                                                                                         | NA                                                                                                                                                        |
| Observations of a deming-related dermatitis in American black bears                                                                                                                                                                 | Costello, Cecily M Quigley, Kathy S Jones, Donald E Inman, Robert M Inman, Kristine H                                                   | 2006 | Ursus                                                  | <i>Ursus americanus</i> (American black bear)                                                                                                 | United States of America     | Wild Free-Living | 85                                                                                  | no  | Dermatitis                        | Undiagnosed dermatitis, alopecia and edema. Affected areas appeared smooth and red, particularly the eyelids                                                                                                                                                                          | Head, neck, and thorax. Dermatitis was confined to the area around the eyes and down the muzzle                                                      | NA                                                                | NA                                                                                                                         | alopecia, American black bear, demning, dermatitis, hibernation, mange, New Mexico, Ursus americanus                                                      |
| Occurrence of Demodex Owen 1843 on a white-tailed deer from Oklahoma                                                                                                                                                                | Carpenter, James W Freeny, J Clay Patton, Clark S                                                                                       | 1972 | Journal of Wildlife Diseases                           | <i>Odocoileus virginianus</i> (white-tailed deer)                                                                                             | United States of America     | Wild Free-Living | 1                                                                                   | no  | Dermatitis                        | Alopecia                                                                                                                                                                                                                                                                              | Abdomen, rump, thighs                                                                                                                                | Mite - ( <i>Demodex sp.</i> )                                     | NA                                                                                                                         | NA                                                                                                                                                        |
| Oral disease in free-living red squirrels ( <i>Sciurus vulgaris</i> ) in the United Kingdom                                                                                                                                         | Sainsbury, Anthony W Kountouri, Amalia Duboulay, George Kertesz, Peter                                                                  | 2004 | Journal of Wildlife Diseases                           | <i>Sciurus vulgaris</i> (red squirrels)                                                                                                       | England                      | Wild Free-Living | 1                                                                                   | yes | Exudative erythematous dermatitis | Skin lesions                                                                                                                                                                                                                                                                          | Face                                                                                                                                                 | Virus - (parapoxvirus)                                            | NA                                                                                                                         | Incisors, malocclusion, molars, periodontal disease, rodent, rodentia.                                                                                    |



|                                                                                                                                                                  |                                                                                                                                |      |                                                                           |                                                                                                                                                                                                                                  |                          |                                   |                                                          |     |                                         |                                                                                                                                                                                                                                                                                                 |                                                                                                                                              |                                                                           |                                                                                                                                                                                                                                                                                                               |                                                                                                                                    |
|------------------------------------------------------------------------------------------------------------------------------------------------------------------|--------------------------------------------------------------------------------------------------------------------------------|------|---------------------------------------------------------------------------|----------------------------------------------------------------------------------------------------------------------------------------------------------------------------------------------------------------------------------|--------------------------|-----------------------------------|----------------------------------------------------------|-----|-----------------------------------------|-------------------------------------------------------------------------------------------------------------------------------------------------------------------------------------------------------------------------------------------------------------------------------------------------|----------------------------------------------------------------------------------------------------------------------------------------------|---------------------------------------------------------------------------|---------------------------------------------------------------------------------------------------------------------------------------------------------------------------------------------------------------------------------------------------------------------------------------------------------------|------------------------------------------------------------------------------------------------------------------------------------|
| Oral, nasal, and cutaneous eosinophilic granulomas in the black rhinoceros ( <i>Diceros bicornis</i> ): a lesion distinct from superficial necrolytic dermatitis | Pessier, Allan P<br>Munson, Linda<br>Miller, R Eric                                                                            | 2004 | Journal of Zoo and Wildlife Medicine                                      | <i>Diceros bicornis michaeli</i> (black rhinoceros, eastern sub-species)                                                                                                                                                         | United States of America | Wild Captive                      | 8                                                        | no  | Superficial necrolytic dermatitis       | Lesions, oral bleeding or epistaxis from multilobulated, fungating, proliferative masses with areas of ulceration. mucosal epidermal hyperplasia, necroses with cutaneous, oral, or nasal mucosal ulcerative lesion                                                                             | Oral, nasal, and cutaneous lesions. occurred most often behind the prehensile lip                                                            | NA                                                                        | Classed as EG (eosinophilic granulomas), but could be nematodes, or could be fungal.                                                                                                                                                                                                                          | Black rhinoceros, <i>Diceros bicornis</i> , eosinophilic granuloma, superficial necrolytic dermatitis, ulcerative dermatopathy.    |
| Orf virus infection in Alaskan mountain goats, Dall's sheep, muskoxen, caribou and Sitka black-tailed deer                                                       | Tryland, Morten<br>Beckmen, Kimberlee Beth<br>Burek-Huntington, Kathleen Ann<br>Breines, Eva Marie<br>Klein, Joern             | 2018 | Acta veterinaria scandinavica                                             | <i>Oreamnos americanus</i> (mountain goat), <i>Ovis dalli dalli</i> (dall sheep), <i>Oribos moschatus</i> (Muskoxen), <i>Odocoileus hemionus sitchensis</i> (Sitka black-tailed deer), <i>Rangifer tarandus granti</i> (caribou) | United States of America | Wild Free-Living                  | 16 (8 goat, 3 sheep, 3 ox, 1 deer, 1 caribou)            | no  | Ulcerative and proliferative dermatitis | Proliferative massessm dark crusts, ulcerative lesions, ulcers                                                                                                                                                                                                                                  | Palpebrae, nares, lips, anus, prepuce or vulva, as well as coronary bands, muzzle, eyes, ears                                                | Virus - (parapoxvirus)                                                    | NA                                                                                                                                                                                                                                                                                                            | Alaska, Caribou, Contagious ecthyma, Dall's sheep, Deer, Mountain goat, Muskox, Parapoxvirus, Virology, Wildlife, Zoonosis         |
| An outbreak of Caparina triplis in a colony of African pygmy hedgehogs ( <i>Aterix albiventris</i> ) from Korea                                                  | Kim, D. H.<br>Oh, D. S.<br>Ahn, K. S.<br>Shin, S. S.                                                                           | 2012 | Korean Journal of Parasitology                                            | <i>Aterix albiventris</i> (African hedgehog)                                                                                                                                                                                     | Korea                    | Wild Captive                      | 22                                                       | no  | dermatitis                              | scale, self-trauma, puritis, flaking, crusts, scabs                                                                                                                                                                                                                                             | mantle armpit, ear                                                                                                                           | Mite - ( <i>Caparina triplis</i> )                                        | NA                                                                                                                                                                                                                                                                                                            | Caparina triplis, hedgehogs, Aterix albiventris, case report                                                                       |
| Palmoplantar nonpustular psoriasisform dermatitis in a rhesus macaque                                                                                            | Piedras, María José GM<br>García-Cabezas, Miguel Ángel<br>Sendagorta, Elena<br>Miró-Murillo, Marta<br>Cavada, Carmen           | 2011 | Veterinary dermatology                                                    | <i>Macaca mulatta</i> (Rhesus macaques)                                                                                                                                                                                          | Spain                    | Wild Laboratory                   | 1                                                        | no  | psoriasisform dermatitis                | palmoplantar nonpustular psoriasis, scaly plaques, nail hyperkeratosis, epidermal hyperkeratosis with multifocal parakeratosis. Erythematous and scaly coalescent plaques                                                                                                                       | palms, soles, nails                                                                                                                          | NA                                                                        | NA                                                                                                                                                                                                                                                                                                            | NA                                                                                                                                 |
| Parapoxvirus causes a deleterious disease in red squirrels associated with UK population declines                                                                | Tompkins, Daniel M<br>Sainsbury, Anthony W<br>Nettleton, Peter<br>Buxton, D<br>Gurnell, J                                      | 2002 | Proceedings of the Royal Society of London. Series B: Biological Sciences | <i>Sciurus vulgaris</i> (red squirrels)                                                                                                                                                                                          | England                  | Wild Free-Living, Wild Laboratory | 10 (6 wild free-living, 4 wild labortuary red squirrels) | yes | Exudative erythematous dermatitis       | Skin lesions, secondary lesions                                                                                                                                                                                                                                                                 | Face, ventral skin surfaces of the feet and body, medial skin of the legs and the genital region                                             | Virus - (parapoxvirus)                                                    | NA                                                                                                                                                                                                                                                                                                            | ecological replacement; emerging infectious disease; grey squirrel; Sciurus carolinensis; Sciurus vulgaris; virus                  |
| Parapoxvirus infections in New Zealand farmed red deer ( <i>Cervus elaphus</i> )                                                                                 | Horner, GW<br>Robinson, AJ<br>Hunter, R<br>Cox, BT<br>Smith, R                                                                 | 1987 | New Zealand Veterinary Journal                                            | <i>Cervus elaphus</i> (red deer)                                                                                                                                                                                                 | New Zealand              | Wild Captive                      | 498                                                      | no  | Proliferative dermatitis                | Scabby lesions, alopecia, crusting, proliferative viral dermatitis. Hyperplasia, dyskeratosis, parakeratosis                                                                                                                                                                                    | muzzle, lips, face, ears, neck, legs, eyelids, mouth, eyelids, perineum,                                                                     | Virus - (orf - parapoxvirus)                                              | NA                                                                                                                                                                                                                                                                                                            | NA                                                                                                                                 |
| Parapovirus infections of red deer, Italy                                                                                                                        | Scagliarini, Alessandra<br>Vaccari, Francesca<br>Turini, Filippo<br>Bianchi, Alessandro<br>Cordoli, Paolo<br>Lavazza, Antonio  | 2011 | Emerging infectious diseases                                              | <i>Cervus elaphus</i> (red deer)                                                                                                                                                                                                 | Italy                    | Wild Free-Living                  | 1                                                        | no  | Contagious pustular dermatitis          | Proliferative lesions, erosions, and ulcers                                                                                                                                                                                                                                                     | Lips, hard palate                                                                                                                            | Virus - (parapoxvirus)                                                    | NA                                                                                                                                                                                                                                                                                                            | Red deer, Chordopoxvirinae, parapoxvirus, evolution, zoonoses, viruses, Italy, dispatch                                            |
| Parasites and associated pathology of the swamp wallaby, <i>Wallabia bicolor</i> (Marsupialia)                                                                   | Beveridge, I<br>Presidente, PJA<br>Speare, R                                                                                   | 1985 | Journal of Wildlife Diseases                                              | <i>Wallabia bicolor</i> (swamp wallaby)                                                                                                                                                                                          | Australia                | Wild Free-living                  | 35                                                       | no  | dermatitis                              | mild localized dermatitis                                                                                                                                                                                                                                                                       | NA                                                                                                                                           | Tick - ( <i>Amblyomrwe triguttatum</i> & <i>Haemaphysalis bancrofti</i> ) | NA                                                                                                                                                                                                                                                                                                            | NA                                                                                                                                 |
| Parasites of the brush-tailed rock wallaby ( <i>Petrogale penicillata</i> )                                                                                      | Barnes, Tamsin S<br>Goldizen, Anne W<br>Morton, John M<br>Coleman, Glen T                                                      | 1985 | Journal of Wildlife Diseases                                              | <i>Petrogale penicillata</i> (brush-tailed rock-wallaby)                                                                                                                                                                         | Australia                | Wild Free-Living                  | 88                                                       | yes | Localized dermatitis                    | Skin lesions, granuloma, mild localized dermatitis                                                                                                                                                                                                                                              | Ear, neck, eyelids, inguinal area, axillary area, shoulders, thighs, chest, pouch, base of tail, flank, genitalia, nose, mandible, and elbow | Tick - ( <i>Ixodes holocyclus</i> , <i>Haemaphysalis bancrofti</i> )      | NA                                                                                                                                                                                                                                                                                                            | Brush-tailed rock-wallaby, coccidia, ectoparasite, fecal egg count, macropodid, Petrogale penicillata, Toxoplasma gondii.          |
| Pathogen prevalence in American black bears ( <i>Ursus Americanus amblyceps</i> ) of the Jemez Mountains, New Mexico, USA                                        | Bard, S. M.<br>Cain, J. W., Iii                                                                                                | 2019 | Journal of Wildlife Diseases                                              | <i>Ursus americanus amblyceps</i> (New Mexico black bear)                                                                                                                                                                        | United States of America | Wild Free-Living                  | 5                                                        | yes | Dermatitis                              | Dermatitis, presumed mange                                                                                                                                                                                                                                                                      | NA                                                                                                                                           | NA                                                                        | Ectoparasites                                                                                                                                                                                                                                                                                                 | Black bear, New Mexico, pathology, plague, serology, Ursus americanus, wildlife disease.                                           |
| Pathologic findings in Western gray squirrels ( <i>Sciurus griseus</i> ) from a notoeidric mange epidemic in the San Bernardino Mountains, California            | Stephenson, N.<br>Swift, P.<br>Villeguigue, J. T.<br>Clifford, D. L.<br>Nyaoke, A.<br>De la Mora, A.<br>Moore, J.<br>Foley, J. | 2013 | International Journal for Parasitology: Parasites and Wildlife            | <i>sciurus griseus</i> (western gray squirrel)                                                                                                                                                                                   | United States of America | Wild Free-living                  | 5                                                        | yes | Dermatitis                              | parakeratotic hyperkeratosis with serocellular crusting, intracorneal pustules, severe dermatitis, lesions, mange                                                                                                                                                                               | skin of the head (including pinnae), neck, front legs and thorax, caudoventral abdomen and dorsomedial thighs                                | Mite - ( <i>Notoedres centrifera</i> )                                    | NA                                                                                                                                                                                                                                                                                                            | Dermatitis, Internal transcribed spacer ITS-2, <i>Notoedres centrifera</i> , Sciurid                                               |
| Pathological and electron microscopical observations on naturally occurring contagious ecthyma outbreak in two wild goats ( <i>Capra aegagrus aegragus</i> )     | Ozmen, O.<br>Dolu, H.                                                                                                          | 2018 | Ankara Universitesi Veteriner Fakultesi Dergisi                           | <i>Capra aegagrus aegragus</i> (wild goat)                                                                                                                                                                                       | Turkey                   | Wild Free-Living                  | 15                                                       | yes | Contagious dermatitis                   | Lesions mainly localized on lips and numerous proliferative papules and pustules, necrotic scabs and swelling, as well as edema, hyperemia and ulcer. multifocal-coalescing necrotizing and proliferative cheilitis and dermatitis in a wild goat                                               | Lips, eyelids, ears, and nose                                                                                                                | Virus - (parapoxvirus)                                                    | NA                                                                                                                                                                                                                                                                                                            | Contagious Ecthyma, electron microscopy, pathology, wild goats (Capra aegagrus aegragus).                                          |
| Pathological findings in a captive colony of maras ( <i>Dolichotis patagonum</i> )                                                                               | Rosas-Rosas, A. G.<br>Juan-Salles, C.<br>Garner, M. M.                                                                         | 2006 | Veterinary Record                                                         | <i>Dolichotis patagonum</i> (maras)                                                                                                                                                                                              | Mexico                   | Wild Captive                      | 18 - 15 (flea); 3(otterNA)                               | no  | Pododermatitis; ectoparasite dermatitis | Chronic unilateral pododermatitis associated with rupture of the tarsal joint capsule.<br><br>cutaneous lesions, multifocal hypotrichosis or alopecia in all seven, ulceration in five, and/or crusting, multifocal hypotrichosis or alopecia, and in one there was hyperkeratosis and crusting | Paws/feet, skin                                                                                                                              | NA; Fleas- ( <i>Echidnophaga spp</i> )                                    | Bacteria and/or Fleas (Aerobic culture from this exudate yielded <i>Staphylococcus</i> , <i>Streptococcus</i> and <i>Pseudomonas</i> species). Seven (from 15) animals which showed flea hyperplastic dermatitis had no fleas on them, however it was still suspected Fleas where the agent of the dermatitis | NA                                                                                                                                 |
| Pathological Findings in Wild Rats ( <i>Rattus rattus</i> ) Captured at Gualo Island, Northern Chilean Patagonia                                                 | Seguel, M.<br>Munoz, F.<br>Paredes, E.<br>Navarrete, M. J.<br>Gottdenker, N. L.                                                | 2017 | Journal of Comparative Pathology                                          | <i>Rattus rattus</i> (black rat)                                                                                                                                                                                                 | Chile                    | Wild Free-Living                  | 105                                                      | yes | Dermatitis                              | Lesions, coalescing areas of yellow ro orange crusting sometimes forming nodular areas of alopecia, Lymphoplasmacytic and eosinophilic hyperkeratotic                                                                                                                                           | Random distribution on body                                                                                                                  | Mite - ( <i>Ornithonyssus bacoti</i> )                                    | NA                                                                                                                                                                                                                                                                                                            | black rat, Guaflo Island, pathogens, pathology                                                                                     |
| Pathology and distribution of trombiculosis in northern chamois ( <i>Rupicapra rupicapra rupicapra</i> ) in the Italian Alps                                     | Salvadori, C.<br>Formenti, N.<br>Tregu, T.<br>Lanfranchi, P.<br>Rossi, L.<br>Citterio, C.<br>Obber, F.<br>Poli, A.             | 2019 | Journal of Wildlife Diseases                                              | <i>Rupicapra rupicapra</i> (chamois)                                                                                                                                                                                             | Italy                    | Wild Free-living                  | 40                                                       | no  | Dermatitis                              | focal moderate dermatitis with epidermal necrosis, thin crusts, and hyperkeratosis, lesions                                                                                                                                                                                                     | muzzle, head (pinnae and areas around eyes and mouth) and limbs                                                                              | Mite - (family Trombiculidae)                                             | NA                                                                                                                                                                                                                                                                                                            | Chiggers, dermatitis, histopathology, larval mites, northern chamois, Rupicapra rupicapra rupicapra, Trombiculidae, trombiculosis. |
| Pathology of interdigital glands in a wild Japanese serow ( <i>Capricornis crispus</i> ) infected with parapoxvirus                                              | Suzuki, Yoshiaki<br>Komatsu, Takeshi<br>Yamamoto, Yoshio<br>Atoji, Yasuro                                                      | 1997 | Journal of veterinary medical science                                     | <i>Capricornis crispus</i> (Japanese serow)                                                                                                                                                                                      | Japan                    | Wild Free-Living                  | 1                                                        | no  | Contagious papular dermatitis           | Lesions, hyperkeratosis                                                                                                                                                                                                                                                                         | Interdigital glands, feet                                                                                                                    | Virus - (parapoxvirus)                                                    | NA                                                                                                                                                                                                                                                                                                            | interdigital gland, Japanese serow, parapoxvirus                                                                                   |
| Pathology of sarcoptic mange in red foxes ( <i>Vulpes vulpes</i> ): Macroscopic and histologic characterization of three disease stages                          | Nimmervoll, H.<br>Hoby, S.<br>Robert, N.<br>Lommano, E.<br>Welle, M.<br>Ryser-Degorgis, M. P.                                  | 2013 | Journal of Wildlife Diseases                                              | <i>Vulpes vulpes</i> (red fox)                                                                                                                                                                                                   | Switzerland              | Wild Free-living                  | 150                                                      | yes | mange dermatitis                        | skin lesion, cursts, hyperpigmentation, local body dermatitis                                                                                                                                                                                                                                   |                                                                                                                                              | Mite - ( <i>Sarcoptes scabiei</i> )                                       | NA                                                                                                                                                                                                                                                                                                            | Classification, dermatitis, disease stage, histopathology, mange, red fox, <i>Sarcoptes scabiei</i> , <i>Vulpes vulpes</i>         |
| Peledera strongyloides infection in Pacific harbor seals ( <i>Phoca vitulina richardi</i> ) from California                                                      | McHuron, Elizabeth A.<br>Miller, Melissa A.<br>Gardiner, Chris H.<br>Batac, Francesca I.<br>Harvey, James T.                   | 2013 | Journal of Zoo and Wildlife Medicine                                      | <i>Phoca vitulina</i> (harbor seal)                                                                                                                                                                                              | United States of America | Wild Free-living                  | 4                                                        | no  | Dermatitis                              | Mild chronic superficial dermatitis and perifolliculitis                                                                                                                                                                                                                                        | face and head, back, dorsal sides, and around its flippers                                                                                   | Nematode - ( <i>Peledera strongyloides</i> )                              | NA                                                                                                                                                                                                                                                                                                            | Dermatitis, harbor seal, Peledera strongyloides, Phoca vitulina, Tomales Bay.                                                      |
| Pen trial of estrogen-induced conditioned food aversion to eggs in raccoons ( <i>Procyon lotor</i> )                                                             | Dueser, Raymond D.<br>Martin, Joel D.<br>Moncrief, Nancy D.                                                                    | 2018 | Applied Animal Behaviour Science                                          | <i>Procyon lotor</i> (raccoons)                                                                                                                                                                                                  | United States of America | Wild Laboratory                   | 7                                                        | yes | dermatitis                              | dermatitis and patchy hair                                                                                                                                                                                                                                                                      | NA                                                                                                                                           | 2 Fungus - dermatophytosis ; 5 unknown                                    | 2 dermatophilosis of some kind, other 5 are unknown, and potentially caused by the treatment of estrogen.                                                                                                                                                                                                     | Behavior, Mesopredator, Conditioned taste aversion, Deception-based food aversion, 17 $\alpha$ -ethinyl estradiol, Egg predation   |



|                                                                                                                                                                        |                                                                                                                                                                   |      |                                                               |                                                                                                                    |                          |                   |                                                             |     |                                  |                                                                                                                                                                                  |                                                           |                                                                                       |                                                                                                                                                                       |                                                                                                                               |
|------------------------------------------------------------------------------------------------------------------------------------------------------------------------|-------------------------------------------------------------------------------------------------------------------------------------------------------------------|------|---------------------------------------------------------------|--------------------------------------------------------------------------------------------------------------------|--------------------------|-------------------|-------------------------------------------------------------|-----|----------------------------------|----------------------------------------------------------------------------------------------------------------------------------------------------------------------------------|-----------------------------------------------------------|---------------------------------------------------------------------------------------|-----------------------------------------------------------------------------------------------------------------------------------------------------------------------|-------------------------------------------------------------------------------------------------------------------------------|
| Phoma ( <i>peyronellaea</i> ) as zoopathogen                                                                                                                           | Gordon, M. A. Salkin, I. F. Stone, W. B.                                                                                                                          | 1975 | Sabouraudia, Journal of Medical and Veterinary Mycology       | <i>Odocoileus virginianus</i> (white-tailed deer)                                                                  | United States of America | Wild Free-living  | 1                                                           | no  | aural dermatitis                 | cutaneous lesions, Severe hair loss was observed, massive epidermal scaling was noted on a large portion of the ears.                                                            | ears, sides of the face and neck                          | Fungus - ( <i>Phoma cava</i> )                                                        | NA                                                                                                                                                                    | NA                                                                                                                            |
| Pododermatitis in farmed mink in Canada                                                                                                                                | Brojer, Caroline                                                                                                                                                  | 2000 | The University of Guelph/National Library of Canada - Thesis  | <i>Neovison vison</i> (Mink)                                                                                       | Canada                   | Wild Captive      | 246                                                         | no  | Pododermatitis                   | ulcerated, crmsty areas of thickened skin. Alopecia, ulcers, crusts, hyperkeratosis, lesions, necrosis, footpad dermatitis                                                       | foot, face, nose, eyelids, head                           | NA                                                                                    | Potentially agent was a contaminant on seal meat                                                                                                                      | NA                                                                                                                            |
| Pododermatitis in farmed mink ( <i>Neovison vison</i> ) in Spain                                                                                                       | Fernández-Antonio, R Fradde, LD Louada, AP López-Peña, M Vázquez, S Bermúdez, R Quiroga, MI Nieto, JM                                                             | 2008 | IX International Scientific Congress in Fur Animal Production | <i>Neovison vison</i> (Mink)                                                                                       | Spain                    | Wild Captive      | 3                                                           | no  | Pododermatitis                   | ulcers, scabs, debris, lesions, hyperkeratosis, necrosis, crusting and abscesses.                                                                                                | foot pads, face                                           | NA                                                                                    | Potential bacterial infection                                                                                                                                         | NA                                                                                                                            |
| Poxvirus identified in a red squirrel ( <i>Sciurus vulgaris</i> ) from Spain                                                                                           | Obon, Elena Juan-Salles, Carles McInnes, Colin J. Everest, David J.                                                                                               | 2011 | Veterinary Record                                             | <i>Sciurus vulgaris</i> (red squirrels)                                                                            | Spain                    | Wild Free-living  | 1                                                           | no  | Dermatitis                       | skin lesions, exudative, ulcerative dermatitis with crusts                                                                                                                       | ear tips, tail, feet                                      | Virus - (Poxvirus family)                                                             | NA                                                                                                                                                                    | NA                                                                                                                            |
| Prevalence and spatio-temporal variation of an alopecia syndrome in polar bears ( <i>Ursus maritimus</i> ) of the southern Beaufort Sea                                | Atwood, Todd Peacock, Elizabeth Borek-Huntington, Kathy Shearn-Bochsler, Valerie Bodenstein, Barbara Beckmen, Kimberlee Durner, George                            | 2015 | Journal of Wildlife Diseases                                  | <i>Ursus maritimus</i> (polar Bear)                                                                                | United States of America | Wild Free-living  | 49                                                          | yes | chronic proliferative dermatitis | alopecia, exudation and crusted skin lesions                                                                                                                                     | head, neck, shoulders                                     | NA                                                                                    | NA                                                                                                                                                                    | Alopecia, Arctic, <i>Ursus maritimus</i> , disease, polar bears, skin lesion.                                                 |
| A previously unidentified Chorioptes species infesting outer ear canals of moose ( <i>Alces alces</i> ): characterization of the mite and the pathology of infestation | Hestvik, Gete Zahler-Rinder, Monika Gavier-Widen, Dolores Lindberg, Ronny Mattsson, Roland Morrison, David Bornstein, Set                                         | 2007 | Acta veterinaria Scandinavica                                 | <i>Alces alces</i> (Moose)                                                                                         | Sweden                   | Wild Free-living  | 43                                                          | no  | Dermatitis                       | lesions, crusts, perivascular to interstitial dermatitis with epidermal hyperkeratosis                                                                                           | ears, ear canal                                           | Mite - ( <i>Chorioptes</i> sp.)                                                       | NA                                                                                                                                                                    | NA                                                                                                                            |
| Psorergatic acariasis in vervet monkeys                                                                                                                                | Seier, Jv                                                                                                                                                         | 1985 | Laboratory animals                                            | <i>Cercopithecus pygerythrus</i> (vervet monkeys)                                                                  | South Africa             | Wild Laboratory   | 7                                                           | no  | Dermatitis                       | Lesions, alopecia                                                                                                                                                                | Eyelids                                                   | Mite - ( <i>Psorergates cercopitheci</i> )                                            | NA                                                                                                                                                                    | Cercopithecus; Mite infestations                                                                                              |
| Psoroptic scabies in desert bighorn sheep ( <i>Ovis canadensis nelsoni</i> ) from northwestern Arizona                                                                 | Welsh, George W Bunch, Thomas D                                                                                                                                   | 1983 | Journal of Wildlife Diseases                                  | <i>Ovis canadensis nelsoni</i> (bighorn sheep)                                                                     | United States of America | Wild Free-Living  | 5                                                           | yes | Psoroptic scabies dermatitis     | Red, crusted epidermis                                                                                                                                                           | Ears                                                      | Mite - ( <i>Psoroptes ovis</i> )                                                      | NA                                                                                                                                                                    | NA                                                                                                                            |
| Purulent Trunk Dermatitis in a Male Ceylon Elephant ( <i>Elephas maximus maximus</i> )                                                                                 | Vodička, R                                                                                                                                                        | 2008 | Acta Veterinaria Brno                                         | <i>Elephas maximus</i> (Asian Elephant)                                                                            | Czechia                  | Wild Captive      | 1                                                           | no  | Purulent dermatitis              | purulent trunk dermatitis, skin lesions, pus.                                                                                                                                    | trunk, tail, behind the ears                              | NA                                                                                    | Probably insufficient humidification, potentially caused by bacteria isolated: <i>Staphylococcus spp.</i> , <i>Streptococcus spp.</i> and <i>Candida tropicalis</i> . | Proboscidea, purulent dermatitis, anaesthesia, haematology, biochemistry                                                      |
| Pustular dermatitis caused by impetigo in red-tailed monkeys ( <i>Cercopithecus ascanius</i> )                                                                         | Coughlin, Patrick Bradford, Carol Montali, Richard J Bronson, Ellen                                                                                               | 2018 | Journal of Zoo and Wildlife Medicine                          | <i>Cercopithecus ascanius</i> (red-tailed monkey)                                                                  | United States of America | Wild Captive      | 2                                                           | no  | Pustular dermatitis              | scabbing and ulceration, suppurative, necrotizing, pustular cheilitis, pustular dermatitis, multifocal vasculitis                                                                | philtrum, nostrils and nasal planum, pinnae, tongue, nose | Bacteria - ( <i>Staphylococcus</i> sp.)                                               | NA                                                                                                                                                                    | Cercopithecus ascanius, <i>Staphylococcus</i> , dermatitis, impetigo, red-tailed monkey.                                      |
| Red squirrels in the British Isles are infected with leprosy bacilli                                                                                                   | Avanzi, Charlotte Del-Pozo, Jorge Benjak, Andrej Stevenson, Karen Simpson, Victor R Basso, Philippe McLuckie, Joyce Loiseau, Chloé Lawton, Colin Schoening, Janne | 2016 | Science                                                       | <i>Sciurus vulgaris</i> (red squirrels)                                                                            | Scotland                 | Wild Free-Living  | 4                                                           | yes | Granulomatous dermatitis         | Lesions, alopecia, extensive swelling                                                                                                                                            | Snout, lips, eyelids, ear pinnae, and limb extremities    | Bacteria - ( <i>Mycobacterium lepromatosis</i> )                                      | NA                                                                                                                                                                    | NA                                                                                                                            |
| Regional alopecia and dermatitis due to <i>Lodderomyces elongisporus</i> in a North American porcupine ( <i>Erethizon dorsatum</i> )                                   | St Clair, Laura Hopf, Cynthia Peters-Kennedy, Jeanine Mazalis, Christina Miller, Julia Scott, Danny W Childs-Sanford, Sara                                        | 2020 | Veterinary dermatology                                        | <i>Erethizon dorsatum</i> (North American porcupines)                                                              | United States of America | Wild Free-living  | 1                                                           | no  | Dermatitis                       | alopecia and scaling dermatitis, mild eosinophilic perivascular-to-interstitial dermatitis, alopecia, hyperpigmentation                                                          | caudal dorsum,                                            | Fungus - ( <i>Lodderomyces elongisporus</i> )                                         | NA                                                                                                                                                                    | NA                                                                                                                            |
| Responses of red foxes to first and second infection with <i>Sarcoptes scabiei</i>                                                                                     | Little, Susan E. Davidson, William R. Nixon, Tammy L. Bounous, Denise I. Nettles, Victor F.                                                                       | 1998 | Journal of Wildlife Diseases                                  | <i>Vulpes vulpes</i> (red fox)                                                                                     | United States of America | Wild Laboratory   | 1                                                           | no  | Dermatitis                       | vere scrotal dermatitis and associated bilateral testicular atrophy                                                                                                              | scrotum                                                   | Mite - ( <i>Sarcoptes scabiei</i> )                                                   | NA                                                                                                                                                                    | Hypersensitivity, immune response, red fox, <i>Sarcoptes scabiei</i> , sarcoptic mange, <i>Vulpes vulpes</i> .                |
| Rhinoceros feet step out of a role-of-thumb: A wildlife imaging pioneering approach of synchronized computed tomography-digital radiography                            | Galataum, G. Hermes, R. Saragossy, J. Göritz, F. Potier, R. Mulot, B. Maillet, A. Etienne, P. Bernardino, R. Fernandes, T. Mews, J. Hildebrandt, T. B.            | 2014 | Plos One                                                      | <i>Ceratotherium simon simon</i> (southern white rhinoceros); <i>Rhinoceros unicornis</i> (Indian Rhinoceros)      | France                   | Wild Captive      | 2 [1 - (southern white rhinoceros); 1- (Indian Rhinoceros)] | yes | Dermatitis/ pododermatitis       | Ceratotherium sinum sinum (southern white rhinoceros) - generalized chronic ulcerative dermatitis.<br><br>Rhinoceros unicornis (Indian Rhinoceros) - chronic pododermatitis.     | NA/four limbs                                             | NA                                                                                    | NA                                                                                                                                                                    | NA                                                                                                                            |
| The role of host and environmental factors in the epidemiology of rumpwear in brushtail possums                                                                        | Hufschmid, J. Handsayde, K. A. Beveridge, I.                                                                                                                      | 2010 | Australian Journal of Zoology                                 | <i>Trichosurus cunninghami</i> (mountain brushtail possum); <i>Trichosurus vulpecula</i> (common brushtail possum) | Australia                | Wild Free-Living  | 131 (114 <i>T. cunninghami</i> and 17 <i>T. vulpecula</i> ) | no  | Exudative dermatitis             | Coat damage in the lumbo-sacral region. Mild to severe hair damage (breakage of tips and matting), alopecia, varying degrees of dermatitis and thickening of the skin            | Coat damage in the lumbo-sacral region                    | NA                                                                                    | NA                                                                                                                                                                    | Trichosurus, body condition, environmental factors, epidemiology, fur, mechanical damage, opossums, skin lesions, New Zealand |
| Sarcoptic mange and Pelodera dermatitis in an American black bear ( <i>Ursus americanus</i> )                                                                          | Fitzgerald, Scott D Cooley, Thomas M Cosgrove, Melinda K                                                                                                          | 2008 | Journal of Zoo and Wildlife Medicine                          | <i>Ursus americanus</i> (American black bear)                                                                      | United States of America | Wild Free-Living  | 1                                                           | no  | Dermatitis and mange             | Hair loss, lichenification, crusting, and focal erosions, ulcerative lesions                                                                                                     | Lateral thorax, dorsal back, face, and all four paws      | Mite - ( <i>Sarcoptes scabiei</i> ), and Nematode - ( <i>Pelodera strongyloides</i> ) | NA                                                                                                                                                                    | Black bear, dermatitis, mange, Pelodera, Sarcoptes.                                                                           |
| Sarcoptic mange in agile wallabies ( <i>Macropus agilis</i> ) in Youl, Jm the Northern Territory                                                                       | McLelland, Dj                                                                                                                                                     | 2005 | Australian veterinary journal                                 | <i>Macropus agilis</i> (agile wallaby)                                                                             | Australia                | Wild Captive      | 2                                                           | yes | Pruritic dermatitis (mange)      | Crusts                                                                                                                                                                           | Hind limbs, tail, trunk, face, forelimbs                  | Mite - ( <i>Sarcoptes scabiei</i> )                                                   | NA                                                                                                                                                                    | NA                                                                                                                            |
| Sarcoptic mange in endangered kit foxes ( <i>Vulpes macrotis munita</i> ): Case histories, diagnoses, and implications for conservation                                | Cypher, B. L. Rudd, J. L. Westall, T. L. Woods, L. W. Stephenson, N. Foley, J. E. Richardson, D. Clifford, D. L.                                                  | 2017 | Journal of Wildlife Diseases                                  | <i>Vulpes macrotis munita</i> (San Joaquin kit fox)                                                                | United States of America | Wild Free-living  | 15                                                          | yes |                                  | Intense pruritus and dermatitis, alopecia, hyperkeratosis, and encrustations,                                                                                                    | face, legs, tail, thorax, abdomen                         | Mite - ( <i>Sarcoptes scabiei</i> )                                                   | NA                                                                                                                                                                    | California, kit fox, mites, <i>Sarcoptes scabiei</i> , sarcoptic mange, <i>Vulpes macrotis munita</i>                         |
| Sarcoptic mange in free-ranging pampas foxes in the Gran Chaco, Bolivia                                                                                                | Deem, S. L. Noss, A. J. Cuellar, R. L. Villarroel, R. Linn, M. J. Forrester, D. J.                                                                                | 2002 | Journal of Wildlife Diseases                                  | <i>Pseudalopex gymnocercus</i> (Pampas foxes)*[ <i>Lycalopex gymnocercus</i> ]                                     | Bolivia                  | Wild Free-ranging | 19                                                          | yes | Pruritic dermatitis (mange)      | lesions, alopecia and thickened, flaky skin, Moderate, chronic dermatitis with orthokeratotic hyperkeratosis                                                                     | caudal dorsal trunk and tail                              | Mite - ( <i>Sarcoptes scabiei</i> )                                                   | NA                                                                                                                                                                    | Bolivia, Gran Chaco, mange, pampas fox, <i>Pseudalopex gymnocercus</i> , <i>Sarcoptes scabiei</i> .                           |
| Sarcoptic mange in free-ranging raccoon dogs ( <i>Nyctereutes procyonoides</i> ) in Japan                                                                              | Ninomiya, Hiroyoshi Ogata, Munetsugu                                                                                                                              | 2005 | Veterinary Dermatology                                        | <i>Nyctereutes procyonoides</i> (Raccoon dog)                                                                      | Japan                    | Wild Free-living  | 3                                                           | no  | Pruritic dermatitis (mange)      | skin lesions, alopecia, extensive dermatitis, corrugated, thickened and covered by greyish plaques of keratinous crusts, warty, cobblestone-like hyperkeratosis, severe malodour | ears, muzzle, eyes, elbow, thigh, neck                    | Mite - ( <i>Sarcoptes scabiei</i> )                                                   | NA                                                                                                                                                                    | NA                                                                                                                            |
| Sarcoptic mange in raccoons in Michigan                                                                                                                                | Fitzgerald, S. D. Cooley, T. M. Murphy, A. Cosgrove, M. K. King, B. A.                                                                                            | 2004 | Journal of Wildlife Diseases                                  | <i>Procyon lotor</i> (raccoons)                                                                                    | United States of America | Wild Free-Living  | 3                                                           | no  | Pruritic dermatitis (mange)      | Intensely pruritic, advanced alopecic and crusting lesions, crusting and hyperkeratotic dermatitis with high numbers of sarcoptes scabiei adults, larvae, nymphs, and eggs.      | Dorsum and hind limbs                                     | Mite - ( <i>Sarcoptes scabiei</i> )                                                   | NA                                                                                                                                                                    | Parasites, pathology, <i>Procyon lotor</i> , raccoon, <i>Sarcoptes scabiei</i> , sarcoptic mange.                             |

|                                                                                                                                                                                              |                                                                                                                                                        |      |                                                                   |                                                          |                          |                  |    |     |                               |                                                                                                                                                                                                                                                                                                                                          |                                                                                                       |                                                                                        |                                                                                              |                                                                                                                               |
|----------------------------------------------------------------------------------------------------------------------------------------------------------------------------------------------|--------------------------------------------------------------------------------------------------------------------------------------------------------|------|-------------------------------------------------------------------|----------------------------------------------------------|--------------------------|------------------|----|-----|-------------------------------|------------------------------------------------------------------------------------------------------------------------------------------------------------------------------------------------------------------------------------------------------------------------------------------------------------------------------------------|-------------------------------------------------------------------------------------------------------|----------------------------------------------------------------------------------------|----------------------------------------------------------------------------------------------|-------------------------------------------------------------------------------------------------------------------------------|
| Sarcoptic mange ( <i>Sarcoptes scabiei</i> ) in wild canids ( <i>Cerdocyon thous</i> )                                                                                                       | Teodoro, Tamires G. W. Lima, Pamela A. Stöbling, Patricia C. Oliveira Junior, Ivam M. Varaschin, Mary S. Wouters, Fládemir Wouters, Angelica T. B.     | 2018 | Pesquisa Veterinaria Brasileira                                   | <i>Cerdocyon thous</i> (crab-eating foxes)               | Brazil                   | Wild Free-living | 2  | no  | Pruritic dermatitis (mange)   | marked acanthosis and hyperkeratosis, alopecia with thick skin crusts                                                                                                                                                                                                                                                                    | head, skin, thorax, limbs and tail                                                                    | Mite - ( <i>Sarcoptes scabiei</i> )                                                    | NA                                                                                           | Sarcoptic mange, <i>Sarcoptes scabiei</i> , <i>Cerdocyon thous</i> , wild canids, skin diseases, mites, scabies, parasitoses. |
| Sarcoptic mange in wild carnivores and its co-occurrence with parasitic helminths in the Western Italian Alps                                                                                | Balestrieri, Alessandro Remonti, Luigi Ferrari, Nicola Ferrari, Angelo Valvo, Tatiana Robetto, Serena Orusa, Riccardo                                  | 2006 | European Journal of Wildlife Research                             | <i>Vulpes vulpes</i> (red fox)                           | Italy                    | Wild Free-living | 32 | yes | Pruritic dermatitis (mange)   | severe dermatitis, lesions, pruritus, alopecia, thickened skin                                                                                                                                                                                                                                                                           | half of body or more                                                                                  | Mite - ( <i>Sarcoptes scabiei</i> )                                                    | NA                                                                                           | Sarcoptic mange - Red fox . Helminths . Concomitant infection                                                                 |
| Seborheic dermatitis in a rhesus monkey ( <i>Macaca mulatta</i> )                                                                                                                            | Newcomer, Ce Fox, Jr Taylor, Rm Smith, De                                                                                                              | 1984 | Laboratory animal science                                         | <i>Macaca mulatta</i> (Rhesus macaques)                  | United States of America | Wild Laboratory  | 1  | no  | Seborheic dermatitis          | Erythematous, exfoliative, pruritic, exudative skin lesions, alopecia,                                                                                                                                                                                                                                                                   | Face, extremities                                                                                     | NA                                                                                     | May have been due to malnutrition (as experiments were done with withholding food)           | seborheic dermatitis, Macaca                                                                                                  |
| Serum chemistry, hematologic, and post-mortem findings in free-ranging bobcats ( <i>Lynx rufus</i> ) with notoedric mange                                                                    | Seriesys, L. E. Foley, J. Owens, S. Woods, L. Boydston, E. E. Lyren, L. M. Poppenga, R. H. Clifford, D. L. Stephenson, N. Radd, J. Riley, S. P.        | 2013 | Journal of Parasitology                                           | <i>Lynx rufus</i> (bobcat)                               | United States of America | Wild Free-Living | 18 | yes | dermatitis                    | severe dermatitis, acanthosis, hyperkeratosis, and parakeratosis with serocellular crusts and subcorneal pustules, alopecia, crusts, excoriations, and lichenification,                                                                                                                                                                  | head, ears, neck, generalized                                                                         | 18/18 - Mite - ( <i>Notoedres cati</i> )<br><br>2/18 - Fungus ( <i>Malassezia</i> sp.) | NA                                                                                           | NA                                                                                                                            |
| A severe outbreak of contagious ecthyma (orf) in a free-ranging musk ox ( <i>Ovibos moschatus</i> ) population in Norway                                                                     | Vikøren, Turid Lillehaug, Atle Åkerstedt, Johan Bretten, Tord Haugum, Magne Tryland, Morten                                                            | 2008 | Veterinary microbiology                                           | <i>Ovibos moschatus</i> (muskox)                         | Norway                   | Wild Free-Living | 19 | no  | Contagious papular dermatitis | Poriferative wart-like lesions, scabby, ulcerations                                                                                                                                                                                                                                                                                      | Muzzle, lips, limbs, udder, oral mucosa                                                               | Virus - (parapoxvirus)                                                                 | NA                                                                                           | Contagious ecthyma; Musk ox; Orf; Ovibos moschatus; Parapoxvirus; Pustular dermatitis                                         |
| Severe ulcerative dermatitis in platypus ( <i>Ornithorhynchus anatinus</i> )                                                                                                                 | Munday, Bl Peel, Bf                                                                                                                                    | 1983 | Journal of Wildlife Diseases                                      | <i>Ornithorhynchus anatinus</i> (platypus)               | Australia                | Wild Free-Living | 4  | no  | Ulcerative dermatitis         | Skin ulceration, ulcers were rough, greyish, granulating surface. severe, suppurating, cuseating granulomatous dermatitis/ myositis associated with the presence of large round organisms,                                                                                                                                               | Skin                                                                                                  | NA                                                                                     | Algae - ( <i>Mucor</i> sp. Identified - but suggestive of a <i>Prototheca</i> sp. infection) | NA                                                                                                                            |
| Severe ulceronecrotic dermatitis associated with mite infestation in the critically endangered amargosa vole ( <i>Microtus californicus scirpensis</i> )                                     | Foley, J. Branson, T. Wood, L. Clifford, D.                                                                                                            | 2013 | Journal of Parasitology                                           | <i>Microtus californicus scirpensis</i> (Amargosa vole)  | United States of America | Wild Free-Living | 60 | yes | Ulceronecrotic dermatitis     | Lesions, which included alopecia, swelling, marginal necrosis, and ulceration, as well as scarring, scabbing, and loss of pinnae, parakeratotic hyperkeratosis and acanthosis with diffuse neutrophilic exocytosis and dense necrotic granulocytes in the epidermis and superficial dermis associated with focal erosion and ulceration. | Deformities on ears (pinnae) and chiggers on the ears and genitalia                                   | Mite - (larval trombiculid in the genus <i>Neotrombicula</i> )                         | NA                                                                                           | NA                                                                                                                            |
| Sheep-associated malignant catarrhal fever-like skin disease in a free-ranging bighorn sheep ( <i>Ovis canadensis</i> ), Alberta, Canada                                                     | Slater, O. M. Peters-Kennedy, J. Lejeune, M. Gummer, D. Macbeth, B. Warren, A. Joseph, T. Li, H. Cunha, C. W. Duignan, P. J.                           | 2017 | Journal of Wildlife Diseases                                      | <i>Ovis canadensis</i> (bighorn sheep)                   | Canada                   | Wild Free-living | 1  | no  | dermatitis                    | alopecia with hyperpigmentation and crusting, skin lesions,                                                                                                                                                                                                                                                                              | face, medial surfaces of the pinnae, dorsal trunk, distal limbs, perineal area, and tail.             | Virus - (Gammaherpesvirinae subfamily)                                                 | NA                                                                                           | Alberta, bighorn sheep, Canada, dermatitis, malignant catarrhal fever, ovine herpesvirus-2, Ovis canadensis, skin             |
| A short review of the diseases of rhinoceros skin with case reports on an exudative dermatitis of the white rhinoceros ( <i>Ceratotherium simum</i> )                                        | Jones, DM Thomsett, LR                                                                                                                                 | 1972 | VerhBer. Erkrank. Zootier.                                        | <i>Ceratotherium simum</i> (white rhinoceros)            | England                  | Wild Captive     | 2  | no  | exudative dermatitis          | superficial abrasions and lacerations of the skin, dermal erosions, erupting pustules, exudate, ulcers and pus                                                                                                                                                                                                                           | shoulders, thorax, neck, body surface,                                                                | NA                                                                                     | NA                                                                                           | NA                                                                                                                            |
| Skin-lesions in free-ranging black rhinoceroses ( <i>Diceros bicornis</i> ) in Zimbabwe                                                                                                      | Kock, N. Kock, M. D.                                                                                                                                   | 1990 | Journal of Zoo and Wildlife Medicine                              | <i>Diceros bicornis</i> (black rhinoceros)               | Zimbabwe                 | Wild Free-Living | 51 | no  | Ulcerative dermatitis         | Lesions were ulcerated, exudative and crusty ulcerated, exudative, crusty, and erythematous and tended to be large (usually >5 cm wide)                                                                                                                                                                                                  | Skin of the ventral neck                                                                              | NA                                                                                     | Nematodes                                                                                    | Black rhinoceros, <i>Diceros bicornis</i> , filarial dermatitis                                                               |
| Spontaneous dermatophilosis in twin white-tailed deer fawns                                                                                                                                  | Roscoe, Douglas E Lund, Robert C Gordon, Morris A Sulkin, Ira F                                                                                        | 1975 | Journal of wildlife diseases                                      | <i>Odocoileus virginianus</i> (white-tailed deer)        | United States of America | Wild Free-Living | 2  | no  | Exudative dermatitis          | Papular, darkly pigmented scabs, crusts, exudative                                                                                                                                                                                                                                                                                       | Muzzle, lips, ears                                                                                    | Bacteria - ( <i>Dermatophilus congolensis</i> )                                        | NA                                                                                           | NA                                                                                                                            |
| Spontaneous Pathology of the Gray Short-Tailed Opossum ( <i>Monodelphis domestica</i> )                                                                                                      | Hubbard, G. B. Mahaney, M. C. Gleaser, C. A. Taylor, D. E. Vandeberg, J. L.                                                                            | 1997 | Laboratory Animal Science                                         | <i>Monodelphis domestica</i> (gray short-tailed opossum) | United States of America | Wild Laboratory  | 10 | no  | Dermatitis                    | Gross lesions, crusts                                                                                                                                                                                                                                                                                                                    | Skin, ears                                                                                            | NA                                                                                     | NA                                                                                           | NA                                                                                                                            |
| Spontaneous poxviral dermatitis and keratoconjunctivitis in free-ranging mule deer ( <i>Odocoileus hemionus</i> ) in Wyoming                                                                 | Williams, Es Becerra, Ym Thome, Et Graham, Tj Owens, Mj Nunamaker, Ce                                                                                  | 1985 | Journal of wildlife diseases                                      | <i>Odocoileus hemionus</i> (mule deer)                   | United States of America | Wild Free-Living | 1  | no  | Ulcerative dermatitis         | On gross examination there was severe mucopurulent bilateral keratoconjunctivitis with central corneal ulceration. The skin was crusty. Circular ulcers beneath tongue                                                                                                                                                                   | Eyes, lips, muzzle and chin, hind feet                                                                | Virus - (parapoxvirus)                                                                 | NA                                                                                           | NA                                                                                                                            |
| Squirrelpox virus: assessing prevalence, transmission and environmental degradation                                                                                                          | Collins, Lisa M Warnock, Neil D Tosh, David G McInnes, Colin Everest, David Montgomery, W Ian Scantlebury, Mike Marks, Nikki Dick, Jaime TA Reid, Neil | 2014 | Plos One                                                          | <i>Sciurus vulgaris</i> (red squirrels)                  | Northern Ireland         | Wild Free-living | 1  | yes | dermatitis                    | thick scabs and severe dermatitis.                                                                                                                                                                                                                                                                                                       | lip                                                                                                   | Virus - (squirrelpox)                                                                  | NA                                                                                           | NA                                                                                                                            |
| Staphylococci dermatitis in mink                                                                                                                                                             | Candell, RA Huttenlauer, GA Casey, HW                                                                                                                  | 1971 | Journal of the American Veterinary Medical Association            | <i>Neovison vison</i> (Mink)                             | United States of America | Wild Laboratory  | 1  | no  | dermatitis                    | lesions, elevated, smooth, yellow papules, crusty exudative, suppurative inflammation                                                                                                                                                                                                                                                    | head, neck, perineal area                                                                             | Bacteria - ( <i>Staphylococcus aureus</i> )                                            | NA                                                                                           | NA                                                                                                                            |
| Staphylococcus intermedius Dermatitis in Denning New Jersey Black Bears ( <i>Ursus americanus</i> )                                                                                          | Keeler, Shamus P Burgess, Kelcey I Lenaster, Heather Huffman, Jane E                                                                                   | 2012 | Journal of the Pennsylvania Academy of Science                    | <i>Ursus americanus</i> (American black bear)            | United States of America | Wild Free-living | 4  | no  | Dermatitis                    | hair loss, crustiness, scaling, and reddening of their skin                                                                                                                                                                                                                                                                              | body                                                                                                  | Bacteria - ( <i>Staphylococcus intermedius</i> )                                       | NA                                                                                           | NA                                                                                                                            |
| Staphylococcus spp., Streptococcus canis, and Arcanobacterium phocae of healthy Canadian farmed mink and mink with pododermatitis                                                            | Chalmers, Gabhan McLean, John Hunter, D. Bruce Bush, Marina Slavic, Darda Pearl, David L. Boerlin, Patrick                                             | 2015 | Canadian journal of veterinary research                           | <i>Neovison vison</i> (Mink)                             | Canada                   | Wild Captive     | 24 | no  | Pododermatitis                | chronic hyperkeratotic purulent plantar dermatitis, suppurative pododermatitis, lesions                                                                                                                                                                                                                                                  | feet                                                                                                  | NA                                                                                     | NA                                                                                           | NA                                                                                                                            |
| Steroid saponin toxicity in eastern grey kangaroos ( <i>Macropus giganteus</i> ): A novel clinicopathologic presentation of hepatogenous photosensitization                                  | Stevenson, C. A. Raidal, S. R. Quinn, J. C. Peters, A.                                                                                                 | 2018 | Journal of Wildlife Diseases                                      | <i>Macropus giganteus</i> (eastern grey kangaroo)        | Australia                | Wild Free-living | 10 | no  | Dermatitis                    | skin lesions, excoriations, thickening, and scab formation, moderate to severe necrotizing or ulcerative lesions                                                                                                                                                                                                                         | skin                                                                                                  | Plant - ( <i>Panicum</i> spp.)                                                         | NA                                                                                           | Australia, blindness, hepatic photosensitization, macropod, marsupial, <i>Panicum</i> , plant poisoning, saponins.            |
| <i>Streptococcus didelphis</i> sp. nov., a streptococcus with marked catalase activity isolated from opossums ( <i>Didelphis virginiana</i> ) with suppurative dermatitis and liver fibrosis | Rurangirwa, F. R. Tettei, C. A. Cui, J. French, D. M. McDonough, P. L. Besser, T.                                                                      | 2000 | International Journal of Systematic and Evolutionary Microbiology | <i>Didelphis virginiana</i> (opossum)                    | United States of America | Wild Captive     | 5  | no  | Suppurative dermatitis        | Skin from five of the opossums was evaluated histologically, cutaneous lesions included suppurative, necrotizing dermatitis (3/5 animals) with extensive serocellular crusts (1/5) and necrotizing cellulitis (2/5) or dermal fibrosis (1/5).                                                                                            | Skin, flank, scrotum, axilla, tail, limbs                                                             | NA                                                                                     | Bacteria - ( <i>Streptococcus</i> spp: <i>Streptococcus didelphis</i> )                      | NA                                                                                                                            |
| Subepidermal vesiculobullous filarial dermatitis in free-ranging American badgers ( <i>Taxidea taxus</i> )                                                                                   | OToole, D Williams, Es Welch, V Nunamaker, Ce Lynn, C                                                                                                  | 1993 | Veterinary pathology                                              | <i>Taxidea taxus</i> (American badger)                   | United States of America | Wild Free-Living | 26 | no  | Ulcerative dermatitis         | Acute/cutaneous/chronic lesions, ulcerative superficial granulomatous dermatitis, necrosis                                                                                                                                                                                                                                               | Inguinal region skin, medial thigh, abdomen                                                           | Nematodes - ( <i>Filaria taxideae</i> )                                                | NA                                                                                           | American badgers; <i>Filaria taxideae</i> ; filariasis; lymphangitis; <i>Taxidea taxus</i> ; vesiculobullous skin diseases.   |
| Successful cyclosporine treatment for atopic dermatitis in a rhesus macaque ( <i>Macaca mulatta</i> )                                                                                        | Ovadia, Shira Wilson, Steven R Zeiss, Caroline J                                                                                                       | 2005 | Comparative Medicine                                              | <i>Macaca mulatta</i> (Rhesus macaques)                  | United States of America | Wild Laboratory  | 1  | no  | Atopic dermatitis             | Pruritus, erythema, alopecia, scaling, exfoliation, and lichenification, lesions                                                                                                                                                                                                                                                         | Ventrum, mandible and neck, axilla and inguinal regions, distal extremities, and interdigital regions | NA                                                                                     | Allergy dermatitis and generalized immune abnormalities.                                     | NA                                                                                                                            |
| Successful treatment of generalized demodicosis in red-handed tamarins ( <i>Saguinus midas</i> ) using a single administration of oral fluralaner                                            | Churgin, Sarah M. Lee, Tso Khong Groenvold, Kristin Kovi, Ramesh C. Cheung, Kam Yan Martelli, Paolo R. Zoo, Cert.                                      | 2018 | Journal of Zoo and Wildlife Medicine                              | <i>Saguinus midas</i> (tamarins)                         | China                    | Wild Captive     | 2  | no  | dermatitis                    | skin masses, pyogranulomatous dermatitis, lesions raised, plaque-like lesions, granulomatous dermatitis                                                                                                                                                                                                                                  | eye, face, anterior surfaces of the forelimbs                                                         | Mite - ( <i>Demodex</i> sp.)                                                           | NA                                                                                           | Acariasis, demodicosis, fluralaner, red-handed tamarin, <i>Saguinus midas</i> .                                               |

|                                                                                                                                               |                                                                                                                                                        |      |                                                                   |                                                               |                          |                  |    |     |                                       |                                                                                                                                                                         |                                                                                                              |                                                                    |                                                                                                                                                                                               |                                                                                                                                                                                                        |
|-----------------------------------------------------------------------------------------------------------------------------------------------|--------------------------------------------------------------------------------------------------------------------------------------------------------|------|-------------------------------------------------------------------|---------------------------------------------------------------|--------------------------|------------------|----|-----|---------------------------------------|-------------------------------------------------------------------------------------------------------------------------------------------------------------------------|--------------------------------------------------------------------------------------------------------------|--------------------------------------------------------------------|-----------------------------------------------------------------------------------------------------------------------------------------------------------------------------------------------|--------------------------------------------------------------------------------------------------------------------------------------------------------------------------------------------------------|
| Superficial necrolytic dermatitis associated with hepatic lipidosis in a red fox ( <i>Vulpes vulpes</i> )                                     | Van Poucke, S. Rest, J. R.                                                                                                                             | 2005 | Veterinary Record                                                 | <i>Vulpes vulpes</i> (red fox)                                | England                  | Wild Captive     | 1  | no  | dermatitis                            | superficial necrolytic dermatitis, hyperkeratosis, ulceration, erosions, crusts and alopecia                                                                            | footpads, carpi, hocks, elbows                                                                               | NA                                                                 | NA                                                                                                                                                                                            | NA                                                                                                                                                                                                     |
| A survey of urinary tract disease in New South Wales koalas                                                                                   | Canfield, P. J.                                                                                                                                        | 1989 | Australian Veterinary Journal                                     | <i>Phascogaleos cinereus</i> (koala)                          | Australia                | Wild Free-Living | 3  | no  | Dermatitis                            | NA                                                                                                                                                                      | Skin                                                                                                         | NA                                                                 | Compromised immune system due to cystitis                                                                                                                                                     | NA                                                                                                                                                                                                     |
| Suspected dermatophilosis in an adult orangutan ( <i>Pongo pygmaeus pygmaeus</i> )                                                            | Brack, Manfred Hochleitner, Claudia Hochleitner, Manfred Zenker, Wolfgang                                                                              | 1997 | Journal of Zoo and Wildlife Medicine                              | <i>Pongo pygmaeus pygmaeus</i> (Northwest Bornean Orangutan)  | Austria                  | Wild Captive     | 1  | no  | Dermatitis                            | Pruritic, vesicular skin disease, crusts                                                                                                                                | Extremities, trunk, and face                                                                                 | Bacteria - ( <i>Dermatophilus congolensis</i> )                    | NA                                                                                                                                                                                            | Skin disease, orangutan, Dermatophilus congolensis                                                                                                                                                     |
| Suspected Pyrrolizidine Alkaloid Hepatotoxicosis in Wild Southern Hairy-Nosed Wombats ( <i>Lasiorhinus latifrons</i> )                        | Woolford, Lucy Fletcher, Mary T. Boardman, Wayne S. J.                                                                                                 | 2014 | Journal of Agricultural and Food Chemistry                        | <i>Lasiorhinus latifrons</i> (Southern hairy-nosed wombat)    | Australia                | Wild Free-living | 10 | yes | Dermatitis                            | alopecia, dermatitis, necrosis, skin lesions, exudative necrosuppurative and hemorrhagic dermatitis with superficial vascular degeneration, thrombosis, and infarction. | body, head, eyelid, ears                                                                                     | Plant - ( <i>Heliotropium europaeum</i> )                          | NA                                                                                                                                                                                            | pyrrolizidine alkaloids, wombat, Lasiorhinus latifrons, hepatotoxic, Heliotropium europaeum                                                                                                            |
| Systematic assessment of the impact of adenovirus infection on a captive reintroduction project for red squirrels ( <i>Sciurus vulgaris</i> ) | Everest, DJ Shuttleworth, CM Grierson, SS Duff, JP Jackson, N Litherland, P Kenward, RE Sudworthy, MF                                                  | 2012 | Veterinary Record                                                 | <i>Sciurus vulgaris</i> (red squirrels)                       | Wales                    | Wild Free-living | 1  | yes | dermatitis                            | severe staphylococcal dermatitis                                                                                                                                        | facial and footpad                                                                                           | Bacteria - ( <i>Staphylococcus</i> sp.)                            | NA                                                                                                                                                                                            | NA                                                                                                                                                                                                     |
| Syphilis in European brown hares ( <i>Lepus europaeus</i> )                                                                                   | Lumeij, JT                                                                                                                                             | 1996 | Veterinary quarterly                                              | <i>Lepus europaeus</i> (European brown hares)                 | Netherlands              | Wild Free-living | 2  | no  | dermatitis                            | skin lesions, dermatitis,                                                                                                                                               | lips, prepuce                                                                                                | Bacteria - ( <i>Treponema</i> sp.)                                 | NA                                                                                                                                                                                            | NA                                                                                                                                                                                                     |
| Tacrolimus ointment: a novel and effective topical treatment of localized atopic dermatitis in a rhesus macaque ( <i>Macaca mulatta</i> )     | Torreilles, Stéphanie L. Luong, Richard H Felt, Stephen A McClure, Diane E                                                                             | 2009 | Journal of the American Association for Laboratory Animal Science | <i>Macaca mulatta</i> (Rhesus macaques)                       | United States of America | Wild Laboratory  | 1  | no  | Atopic dermatitis                     | Focal, exudative, inflamed, erythematous skin lesion, raised lesions, alopecia, scaling, lichenification, and exfoliation                                               | Mandible                                                                                                     | NA                                                                 | Allergy dermatitis (atopic dermatitis)                                                                                                                                                        | NA                                                                                                                                                                                                     |
| <i>Thadenu greeni</i> -associated dermatitis in an eastern bettong ( <i>Bettongia gainardi</i> )                                              | Portus, Timothy J Taylor, David Spratt, David M                                                                                                        | 2015 | Journal of Zoo and Wildlife Medicine                              | <i>Bettongia gainardi</i> (bettong)                           | Australia                | Wild Free-Living | 1  | no  | Dermatitis                            | Extensive alopecia, scaling, crusting and dermatitis, chronic proliferative and hyperkeratotic perivascular dermatitis with intralesional mites                         | Ventral and lateral aspects of the neck and thorax.                                                          | Mite - ( <i>Thadenu greeni</i> )                                   | NA                                                                                                                                                                                            | Bettongia gainardi; Thadenu greeni; dermatitis; eastern bettong; mite                                                                                                                                  |
| Therapeutic management of bacterial dermatitis in captive Asian elephant ( <i>Elephas maximus</i> )                                           | Gogoi, P Phukan, A Sharma, RK Mahato, G Hazarika, RA D Boro, PK                                                                                        | 2017 | Journal of Entpmology and Zoology Studies                         | <i>Elephas maximus</i> (Asian Elephant)                       | India                    | Wild captive     | 21 | no  | Dermatitis                            | marked pyogenic lesions                                                                                                                                                 | trunk, neck, abdomen, tail, back, thigh, leg and in the foot regions.                                        | Bacteria - ( <i>Staphylococcus</i> sp.)                            | NA                                                                                                                                                                                            | Captive Asian elephants, Bacterial dermatitis, <i>S. aureus</i> , <i>S. intermedius</i> , <i>S. hyicus</i> , <i>S. saprophyticus</i> , <i>S. caseolyticus</i> , and <i>Amoxicillin/Clavulanic acid</i> |
| Trauma found to be a significant cause of death in a pathological investigation of bent-winged bats ( <i>Miniopterus orianae</i> )            | Holz, Peter H. Stant, Andrew Lumsden, Linda F. Hufschmid, Jasmin                                                                                       | 2020 | Journal of Zoo and Wildlife Medicine                              | <i>Miniopterus orianae oceanensis</i> (eastern bent-wing bat) | Australia                | Wild Free-living | 1  | yes | dermatitis                            | hyperkeratotic lesions,                                                                                                                                                 | dorsal surface of both wings                                                                                 | Mite - ( <i>Notodres muris</i> )                                   | NA                                                                                                                                                                                            | Eastern bent-winged bat, Miniopterus orianae bussanil, Miniopterus orianae oceanensis, mite, Notodres muris, southern bent-winged bat                                                                  |
| Treatment of chronic herpesviral dermatitis in a captive cheetah ( <i>Acinonyx jubatus</i> ) in Namibia                                       | Flacke, Gabriela L. Schmidt-Küntzel, Anne Marker, Laurie                                                                                               | 2015 | Journal of Zoo and Wildlife Medicine                              | <i>Acinonyx jubatus</i> (cheetah)                             | Namibia                  | Wild Captive     | 1  | no  | Feline chronic herpesviral dermatitis | Cutaneous lesions consisting of alopecia, erythema, ulceration and crusting                                                                                             | Left fore and hind limbs                                                                                     | Virus - (Feline herpesvirus-NA 1 (FHV-1))                          | NA                                                                                                                                                                                            | <i>Acinonyx jubatus</i> ; cheetah; cryotherapy; famciclovir; feline herpesvirus-1 (FHV-1); ulcerative dermatitis                                                                                       |
| Treatment of mange caused by <i>Caparinia tripilis</i> in native Korean wild hedgehogs ( <i>Eriacus amurensis</i> ): a case report            | Eo, K. Y. Kwak, D. Kwon, O. D.                                                                                                                         | 2015 | Veterinari Medicina                                               | <i>Eriacus amurensis</i> (Korean hedgehog)                    | South Korea              | Wild Captive     | 1  | yes | dermatitis                            | pruritic dermatitis, skin lesions                                                                                                                                       | outer ears and upper chest                                                                                   | Mite - ( <i>Caparinia tripilis</i> )                               | NA                                                                                                                                                                                            | caparinosiis; mange; Eriacus amurensis; native Korean wild hedgehogs; treatment                                                                                                                        |
| Treatment of vasculitis and dermatitis in a 59-yr-old Nile hippopotamus ( <i>Hippopotamus amphibius</i> )                                     | Spriggs, Maria Reeder, Chris                                                                                                                           | 2012 | Journal of Zoo and Wildlife Medicine                              | <i>Hippopotamus amphibius</i> (Nile hippopotamus)             | United States of America | Wild Captive     | 1  | no  | Dermatitis                            | Ulcers, inflammation, focal erosions skin lesions were hyperemic, and several had purulent and malodorous discharge                                                     | Skin folds, vulva, and tongue, axillae, groin, perivulvar region, and flanks                                 | NA                                                                 | Bacteria - ( <i>Morganella morganii</i> , and <i>Enterococcus</i> sp.)                                                                                                                        | Dermatitis, hippopotamus, <i>Hippopotamus amphibius</i> , skin, <i>Streptococcus</i> , <i>vasculitis</i> .                                                                                             |
| Treatment success in three Andean bears ( <i>Tremarctos ornatus</i> ) with Alopecia syndrome using oclacitinib maleate (Apoquel®)             | Drake, Gabby J Nuttall, Tim López, Javier Magnone, William Leclerc, Antoine Potier, Romain Lécro, Alexis Guézéne, Maelle Kolter, Lydia Nicolau, Amelie | 2017 | Journal of Zoo and Wildlife Medicine                              | <i>Tremarctos ornatus</i> (Andean bear)                       | France, Italy, England   | Wild Captive     | 3  | yes | Atopic dermatitis                     | Alopecia, pruritus, hyperkeratosis, scaling, dry, crusted                                                                                                               | Back and flanks, periorbital, and medial thigh skin                                                          | NA                                                                 | Allergy dermatitis (atopic dermatitis), Fungus ( <i>Malassezia</i> spp.)                                                                                                                      | Alopecia, Andean bear, oclacitinib maleate, pruritus, spectacled bear, Tremarctos ornatus.                                                                                                             |
| Treponemal infections in hares in The Netherlands                                                                                             | Lumeij, J. T. de Koning, J. Bosma, R. B. van der Sluis, J. J. Schellekens, J. F.                                                                       | 1994 | Journal of clinical microbiology                                  | <i>Lepus europaeus</i> (European brown hares)                 | Netherlands              | Wild Free-living | 2  | no  | Dermatitis                            | skin lesions, ulcers, crusts, dermatitis                                                                                                                                | oral skin and the prepuce, anogenital area, scrotal                                                          | Bacteria - ( <i>Treponema</i> sp.)                                 | NA                                                                                                                                                                                            | NA                                                                                                                                                                                                     |
| Treponeme-associated hoof disease of free-ranging elk ( <i>Cervus elaphus</i> ) in Southwestern Washington State, USA                         | Han, Sushan Mansfield, Kristin G Bradway, Dan S Bosser, Thomas E Read, Deryck H Haldorson, Gary J Alt, David P Wilson-Welder, Jennifer H               | 2019 | Veterinary pathology                                              | <i>Cervus elaphus</i> (red deer)                              | United States of America | Wild Free-Living | 2  | no  | Dermatitis                            | Cutaneous foot lesion with interdigital ulcerative dermatitis. Suppurative and erosive interdigital dermatitis with chronic acanthosis, necrotizing dermatitis          | Foot                                                                                                         | NA                                                                 | Dermatitis was associated with Treponema sp. Bacteria, in combination with a diversity of aerobic and anaerobic bacteria.                                                                     | Cervus elaphus, digital dermatitis, elk, sole ulcers, spirochete, Treponema, treponeme-associated hoof disease                                                                                         |
| Trombiculiasis in the Florida black bear                                                                                                      | Cunningham, Mark W Phillips, Lynette A Welbourn, Cal                                                                                                   | 2001 | Journal of Wildlife Diseases                                      | <i>Ursus americanus floridanus</i> (Florida black bear)       | United States of America | Wild Free-Living | 2  | no  | Dermatitis                            | Pustular cutaneous lesions, crusting and scaling                                                                                                                        | Ventral abdomen, inguinal, and axillary regions, entire body                                                 | Mite - ( <i>Trombiculidae</i> spp. <i>Eutrombicula splendens</i> ) | NA                                                                                                                                                                                            | Black bear, chigger, dermatitis, Eutrombicula splendens, Trombiculidae, trombiculiasis, Ursus americanus floridanus                                                                                    |
| Trombidiosis-induced dermatitis in white-tailed deer ( <i>Odocoileus virginianus</i> )                                                        | Little, S. E. Carmichael, K. P. Rakich, P. M.                                                                                                          | 1997 | Veterinary Pathology                                              | <i>Odocoileus virginianus</i> (white-tailed deer)             | United States of America | Wild Free-Living | 6  | no  | Plasmacytic dermatitis                | Orange granular material. Serous exudate, crusting, and alopecia. severe chronic diffuse plasmacytic dermatitis with intralesional larval trombiculid mites             | Eyes and mouth                                                                                               | Mite - ( <i>Trombiculidae</i> spp.)                                | NA                                                                                                                                                                                            | chiggers, dermatitis, odocoileus virginianus, trombiculidae, white-tailed deer                                                                                                                         |
| Use of oral fluralaner (Bravecto) to successfully manage adult-onset generalised demodicosis in a silver fox ( <i>Vulpes vulpes</i> )         | Burke, A. Kottwitz, J. Wang, C. White, A.                                                                                                              | 2019 | Veterinary Record Case Reports                                    | <i>Vulpes vulpes</i> (red fox)                                | United States of America | Wild Captive     | 1  | no  | Dermatitis                            | alopecia, crusts, nodules, pustules, crusts                                                                                                                             | dorsal muzzle, distal extremities, limbs                                                                     | Mite - ( <i>Demodex canis</i> )                                    | NA                                                                                                                                                                                            | NA                                                                                                                                                                                                     |
| Vaccine-induced canine distemper in European mink, <i>Mustela lutreola</i>                                                                    | SutherlandSmith, M. R. Rideout, B. A. Mikolon, A. B. Appel, M. J. G. Morris, P. J. Shima, A. L. Janssen, D. J.                                         | 1997 | Journal of Zoo and Wildlife Medicine                              | <i>Mustela lutreola</i> (European mink)                       | United States of America | Wild Captive     | 4  | yes | Dermatitis                            | multifocal papulopustular dermatitis, skin lesions, necrotizing dermatitis                                                                                              | axillary areas                                                                                               | Virus - (Canine distemper virus)                                   | NA                                                                                                                                                                                            | Vaccine-induced canine distemper, avian-origin canine distemper vaccine, Mustela lutreola,                                                                                                             |
| Vesicular and ulcerative dermatopathy resembling superficial necrolytic dermatitis in captive black rhinoceroses ( <i>Diceros bicornis</i> )  | Munson, L. Koehler, J Wilkinson Wilkinson, Je Miller, Re                                                                                               | 1998 | Veterinary Pathology                                              | <i>Diceros bicornis</i> (black rhinoceros)                    | United States of America | Wild Captive     | 40 | yes | Superficial necrolytic dermatitis     | Lesions as vesicles, bullae, or ulcers, ulceration, parakeratos                                                                                                         | Pressure points, coronary bands, tips of the ears and tail, and along the lateral body wall and dorsum, lips | NA                                                                 | The high prevalence of this skin disease in captive black rhinoceroses under many circumstances suggests that their epidermis is acutely sensitive to any disruption of metabolic homeostasis | Black rhinoceros; eosinophilic granulomas; hepatocutaneous syndrome; necrolytic migratory erythema; skin; superficial necrolytic dermatitis; ulcerative skin disease                                   |



|                                                                                                                                     |                                                                                                                                                                                                              |      |                                                |                                             |                          |                  |   |     |                       |                                                                                    |                               |                                            |    |                                                                                |
|-------------------------------------------------------------------------------------------------------------------------------------|--------------------------------------------------------------------------------------------------------------------------------------------------------------------------------------------------------------|------|------------------------------------------------|---------------------------------------------|--------------------------|------------------|---|-----|-----------------------|------------------------------------------------------------------------------------|-------------------------------|--------------------------------------------|----|--------------------------------------------------------------------------------|
| West Nile virus infection in free-ranging squirrels in Illinois                                                                     | Heinz-Taheny, Kathleen M<br>Andrews, John J<br>Kinsel, Michael J<br>Pessier, Allan P<br>Pinkerton, Marie E<br>Lemberger, Karin Y<br>Novak, Robert J<br>Dizikes, George J<br>Edwards, Eric<br>Komar, Nicholas | 2004 | Journal of veterinary diagnostic investigation | <i>Sciurus carolinensis</i> (gray squirrel) | United States of America | Wild Captive     | 1 | no  | dermatitis            | lesion, mild proliferative dermatitis                                              | NA                            | NA                                         | NA | NA                                                                             |
| Winter tick ( <i>Dermacentor albipictus</i> )-associated dermatitis in a wild elk ( <i>Cervus canadensis</i> ) in Pennsylvania, USA | Calvente, E.<br>Chinnici, N.<br>Brown, J.<br>Banfield, J. E.<br>Brooks, J. W.<br>Yabsley, M. J.                                                                                                              | 2020 | Journal of Wildlife Diseases                   | <i>Cervus canadensis</i> (elk)              | United States of America | Wild Free-living | 1 | yes | Ulcerative dermatitis | Severe chronic-active dermatitis with hyperkeratosis and crust formation, alopecia | neck, dorsum region           | Tick - ( <i>Dermacentor albipictus</i> )   | NA | NA                                                                             |
| Zinc-responsive dermatosis in a red wolf ( <i>Canis rufus</i> )                                                                     | Kearns, Karen<br>Steenman, Jonathan<br>Frank, Linda<br>Munson, Linda                                                                                                                                         | 2000 | Journal of Zoo and Wildlife Medicine           | <i>Canis rufus</i> (red wolf)               | United States of America | Wild Captive     | 1 | yes | Dermatitis            | Hyperkeratosis, inflamed skin, ulcers, crusts                                      | Limbs, feet, footpads, digits | Environmental - ( <i>Zinc deficiency</i> ) | NA | Canis rufus, dermatosis, parakeratosis, nutritional dermatosis, red wolf, zinc |

**Table S3.** All individually reported dermatitis cases for each order. These orders were included in further analysis but since each order had 10 or less dermatitis diagnoses and fewer than five species within the grouping, their results are displayed here rather than in-text. The number of cases for each species, split into captivity status (wild free-living (WFL), wild captive (WC), and wild laboratory (WL)) for the corresponding cause.

| Order           | Species                               | Cause    | Cases |    |    |
|-----------------|---------------------------------------|----------|-------|----|----|
|                 |                                       |          | WFL   | WC | WL |
| Didelphimorphia |                                       |          |       |    |    |
|                 | <i>Didelphis virginiana</i>           | Unknown  |       | 1  |    |
|                 | <i>Monodelphis domestica</i>          | Unknown  |       |    | 1  |
| Eulipotyphla    |                                       |          |       |    |    |
|                 | <i>Erinaceus europaeus</i>            | Bacteria | 1     |    |    |
|                 | <i>Atelerix albiventris</i>           | Mite     |       | 2  |    |
|                 | <i>Erinaceus albiventris</i>          | Unknown  |       | 1  |    |
|                 | <i>Erinaceus amurensis</i>            | Mite     |       | 1  |    |
| Lagomorpha      |                                       |          |       |    |    |
|                 | <i>Lepus timidus</i>                  | Virus    | 1     |    |    |
|                 | <i>Pentalagus furnessi</i>            | Mite     | 1     |    |    |
|                 | <i>Sylvilagus floridanus</i>          | Bacteria | 1     |    |    |
|                 | <i>Lepus europaeus</i>                | Bacteria | 2     |    |    |
| Perissodactyla  |                                       |          |       |    |    |
|                 | <i>Ceratotherium simum</i>            | Fungus   |       | 1  |    |
|                 |                                       | Unknown  |       | 2  |    |
|                 | <i>Diceros bicornis</i>               | Nematode | 1     |    |    |
|                 |                                       | Unknown  | 1     | 3  |    |
|                 | <i>Rhinoceros unicornis</i>           | Fungus   |       | 1  |    |
|                 |                                       | Unknown  |       | 1  |    |
| Chiroptera      |                                       |          |       |    |    |
|                 | <i>Eptesicus fuscus</i>               | Unknown  | 1     |    |    |
|                 | <i>Miniopterus orianae oceanensis</i> | Mite     | 1     |    |    |
|                 | <i>Vespertilio murinus</i>            | Fungus   | 1     |    |    |
|                 | <i>Vespertilionidae (family)</i>      | Unknown  | 1     |    |    |
| Other           |                                       |          |       |    |    |
|                 | <i>Elephas maximus</i>                | Unknown  |       | 1  |    |
|                 |                                       | Bacteria |       | 1  |    |
|                 | <i>Ornithorhynchus anatinus</i>       | Fungus   | 1     |    |    |
|                 |                                       | Unknown  | 1     |    |    |
|                 | <i>Procavia capensis</i>              | Mite     |       | 1  |    |
|                 | <i>Zaedyus pichi</i>                  | Unknown  | 1     | 1  |    |

**Table S4.** Etiological agents responsible for the causes of dermatitis across terrestrial and semi-aquatic mammalian wildlife species. There were over 60 causal agents of dermatitis for the 108 wildlife species, some agents were only identified to the nearest family or genus, or in some cases were reported as an unknown agent (e.g., ‘unknown nematode’). The causes of dermatitis, the etiological agents, and the total number of wild mammal species for each are shown below.

| <b>Bacteria</b>                    | <b>Species</b> | <b>Fungus</b>                                       | <b>Species</b> |
|------------------------------------|----------------|-----------------------------------------------------|----------------|
| <i>Dermatophilus congolensis</i>   | 18             | <i>Malassezia</i> sp. (genus)                       | 6              |
| <i>Chromobacterium violaceum</i>   | 2              | <i>Trichophyton mentagrophytes</i>                  | 4              |
| <i>Dichelobacter nodosus</i>       | 1              | <i>Candida</i> sp. (genus)                          | 4              |
| <i>Staphylococcus</i> sp. (genus)  | 7              | <i>Fusarium</i> sp. (genus)                         | 3              |
| <i>Arcanobacterium</i> sp. (genus) | 2              | <i>Yarrowia (Candida) lipolytica</i>                | 3              |
| <i>Mycobacterium lepromatosis</i>  | 1              | Unknown fungus                                      | 1              |
| <i>Streptomyces</i> sp. (genus)    | 1              | <i>Alternaria</i> sp. (genus)                       | 1              |
| <i>Treponema</i> sp. (genus)       | 2              | <i>Mucor amphibiorum</i>                            | 1              |
|                                    |                | <i>Curvularia</i> sp. (genus)                       | 1              |
| <b>Nematode</b>                    | <b>Species</b> | <i>Pityrosporum pachydermatis</i>                   | 1              |
| <i>Filaria taxideae</i>            | 3              | <i>Cladosporium</i> sp. And <i>Rhodotorula</i> sp.  | 1              |
| Unknown nematode                   | 2              | Unknown dermatophytosis                             | 1              |
| <i>Pelodera strongyloides</i>      | 1              | <i>Phoma cava</i>                                   | 1              |
|                                    |                | <i>Lodderomyces elongisporus</i>                    | 1              |
| <b>Mite</b>                        | <b>Species</b> | <b>Tick</b>                                         | <b>Species</b> |
| <i>Demodex</i> sp. (genus)         | 8              | <i>Ixodes</i> sp. (genus)                           | 3              |
| <i>Notoedres</i> sp. (genus)       | 8              | <i>Haemaphysalis bancrofti</i>                      | 2              |
| <i>Sarcoptes scabiei</i>           | 7              | <i>Amblyomma maculatum</i> and <i>A. americanum</i> | 1              |
| Trombiculidae (family)             | 3              | <i>Amblyomrrw triguttatum</i>                       | 1              |
| <i>Ornithonyssus bacoti</i>        | 2              | <i>Dermacentor albipictus</i>                       | 1              |
| <i>Thadeua serrata</i>             | 2              |                                                     |                |
| <i>Psoroptes</i> sp. (genus)       | 2              | <b>Virus</b>                                        | <b>Species</b> |
| <i>Caparinia tripilis</i>          | 2              | <i>Parapoxvirus</i> (genus)                         | 13             |
| <i>Chorioptes</i> sp. (genus)      | 2              | <i>Poxviridae</i> (family)                          | 2              |
| <i>Straelensia cynotis</i>         | 1              | Felid alphaherpesvirus 1                            | 1              |
| <i>Leptotrombidium miyajimai</i>   | 1              | Squirrelpox virus                                   | 1              |
| <i>Neotrombicula</i> sp. (genus)   | 1              | Gammaherpesvirinae subfamily                        | 1              |
| <i>Odontacarus adelaideae</i>      | 1              | <i>Canine morbillivirus</i>                         | 1              |
| <i>Psorergates cercopithecii</i>   | 1              | <i>Cervidpoxvirus</i> (genus)                       | 1              |
| <i>Psorobia</i> sp. (genus)        | 1              |                                                     |                |
| <i>Thadeua greeni</i>              | 1              |                                                     |                |
| <i>Ursicoptes americanus</i>       | 1              |                                                     |                |



|                                                                                                                          |         | Other                                                                          | Species |
|--------------------------------------------------------------------------------------------------------------------------|---------|--------------------------------------------------------------------------------|---------|
| Diptera                                                                                                                  | Species | Apicomplexan – <i>Besnoitia</i> sp. (genus)                                    | 2       |
| <i>Lipopte cervi</i>                                                                                                     | 2       | Fleas – <i>Echidnophaga</i> sp. (genus)                                        | 2       |
| <i>Dermatobia hominis</i>                                                                                                | 1       | Mineral deficiency                                                             | 1       |
| Bacteria & Fungus                                                                                                        | Species | Ectoparasites - mites, louse, or deer ked                                      | 1       |
| Bacteria ( <i>Arcanobacterium haemolyticum</i> , <i>Staphylococcus</i> sp., <i>Streptococcus</i> sp.) & Fungus (unknown) | 1       | Protozoa - <i>Neospora caninum</i>                                             | 1       |
| Bacteria ( <i>Dermatophilus congolensis</i> ) & Fungus ( <i>Alternaria alternata</i> )                                   | 1       | Mite ( <i>Notoedres cati</i> ) & Fungus ( <i>Malassezia</i> sp.)               | 1       |
| Louse                                                                                                                    | Species | Mite ( <i>Sarcoptes scabiei</i> ) & Nematode ( <i>Pelodera strongyloides</i> ) | 1       |
| <i>Neohaematopinus sciuri</i>                                                                                            | 1       | Plant                                                                          | Species |
| <i>Heterodoxus ualabati</i>                                                                                              | 1       | <i>Panicum</i> sp. (genus)                                                     | 1       |
|                                                                                                                          |         | <i>Heliotropeum europaeum</i>                                                  | 1       |
|                                                                                                                          |         | <i>Lantanan camara</i>                                                         | 1       |
|                                                                                                                          |         | <i>Bidens laevis</i>                                                           | 1       |

**Table S5.** Each reported IUCN (2021) threatened species dermatitis case: the dermatitis cause is listed; whether any additional concurrent disease or disorders were identified in the individual(s); whether the dermatitis cause was treated; and whether the treatment successfully resolved the dermatitis, unsuccessful treatments either resolved in euthanasia or death of the individual(s). Treatment of dermatitis was attempted in 26 cases (58%), which consisted of medical intervention for the cure of the cause of dermatitis (e.g., antibiotics; ivermectin), or for mitigation of clinical signs (e.g., removal of lesions) if the cause was chronic (e.g., Feline Herpes Virus in Cheetahs). Treatment was deemed successful in most instances (n = 17), unsuccessful in six cases, and not reported in three (NA). Treatment was not attempted in 19 cases (42%), because these were either: free living animals (5), spontaneously recovered (3), died from no treatment (1), were presented dead or euthanized on arrival for necropsy (9), or there was insufficient data (1). Notes for some cases are provided due to the complexity of treatment success in species.

| IUCN (2021) Threatened Species cases                         | Dermatitis cause   | Total individuals | Concurrent disease//disorder identified? | Treatment | Successful | Note                                                                                                            |
|--------------------------------------------------------------|--------------------|-------------------|------------------------------------------|-----------|------------|-----------------------------------------------------------------------------------------------------------------|
| <i>Canis rufus</i> (Red Wolf)                                | Mineral Deficiency | 1                 | No                                       | Yes       | Yes        | Recovered                                                                                                       |
| <i>Dasyprocta mexicana</i> (Mexican Agouti)                  | Fleas              | 3                 | No                                       | Yes       | Yes        | Recovered                                                                                                       |
| <i>Diceros bicornis</i> (Black Rhinoceros)                   | Unknown            | 40                | Yes                                      | Yes       | Yes/No     | No: death from concurrent diseases. Treatment success was variable, and some lesions resolved without treatment |
| <i>Diceros bicornis</i> (Black Rhinoceros)                   | Unknown            | 8                 | Yes                                      | Yes       | Yes/No     | 3 treated: 2 died, 1 recovered                                                                                  |
| <i>Diceros bicornis</i> (Black Rhinoceros)                   | Unknown            | 51                | No                                       | NA        | NA         | NA: wild free-living                                                                                            |
| <i>Diceros bicornis</i> (Black Rhinoceros)                   | Unknown            | 1                 | Yes                                      | Yes       | No         | Died                                                                                                            |
| <i>Diceros bicornis</i> (Black Rhinoceros)                   | Nematode           | 1                 | No                                       | No        | NA         | NA: wild free-living                                                                                            |
| <i>Mustela lutreola</i> (European Mink)                      | Virus              | 4                 | No                                       | Yes       | No         | No: 1 died during operation, all 3 were treated died                                                            |
| <i>Pongo pygmaeus pygmaeus</i> (Northwest Bornean Orangutan) | Bacteria           | 1                 | No                                       | Yes       | Yes        | Recovered                                                                                                       |
| <i>Ailurus fulgens</i> (Red Panda)                           | Nematode           | 1                 | No                                       | No        | No         | Death                                                                                                           |
| <i>Ailurus fulgens</i> (Red Panda)                           | Bacteria           | 1                 | No                                       | Yes       | No         | Death                                                                                                           |
| <i>Elephas maximus</i> (Asian Elephant)                      | Unknown            | 1                 | No                                       | Yes       | yes        | -                                                                                                               |
| <i>Elephas maximus</i> (Asian Elephant)                      | Bacteria           | 21                | No                                       | Yes       | Yes        | -                                                                                                               |
| <i>Pentalagus furnessi</i> (Amami Rabbit)                    | Mite               | 1                 | No                                       | NA        | NA         | Found Dead                                                                                                      |
| <i>Petrogale persephone</i> (Proserpine Rock Wallaby)        | Mite               | 6                 | No                                       | NA        | NA         | Found Dead                                                                                                      |
| <i>Symphalangus syndactylus</i> (Siamang)                    | Mite               | 2                 | No                                       | Yes       | Yes        | Recovered                                                                                                       |

|                                                          |              |    |     |     |     |                                                         |
|----------------------------------------------------------|--------------|----|-----|-----|-----|---------------------------------------------------------|
| <i>Acinonyx jubatus</i> (Cheetah)                        | Virus        | 3  | No  | Yes | No  | Chronic disease and treatment was not successful        |
| <i>Acinonyx jubatus</i> (Cheetah)                        | Virus        | 20 | Yes | Yes | No  | Chronic disease and treatment were minimally responsive |
| <i>Acinonyx jubatus</i> (Cheetah)                        | Virus        | 50 | No  | Yes | NA  | Chronic disease                                         |
| <i>Acinonyx jubatus</i> (Cheetah)                        | Virus        | 21 | No  | Yes | NA  | Insufficient data                                       |
| <i>Acinonyx jubatus</i> (Cheetah)                        | Virus        | 1  | Yes | Yes | No  | Euthanized                                              |
| <i>Alouatta palliata</i> (Mantled Howler Monkey)         | Bacteria     | 1  | No  | NA  | NA  | Euthanized on arrival                                   |
| <i>Budorcas taxicolor tibetana</i> (Sichuan Takin)       | Virus        | 2  | No  | No  | Yes | Resolved spontaneously                                  |
| <i>Hippopotamus amphibius</i> (Nile Hippopotamus)        | Unknown      | 1  | No  | Yes | Yes | -                                                       |
| <i>Hippopotamus amphibius</i> (Nile Hippopotamus)        | Unknown      | 3  | No  | Yes | Yes | -                                                       |
| <i>Hippopotamus amphibius</i> (Nile Hippopotamus)        | Unknown      | 3  | No  | NA  | NA  | Insufficient data                                       |
| <i>Lagothrix lagotricha</i> (Woolly Monkey)              | Bacteria     | 1  | No  | Yes | Yes | -                                                       |
| <i>Macaca fascicularis</i> (Crab-eating Macaque)         | Unknown      | 1  | No  | No  | Yes | Lesions resolved spontaneously                          |
| <i>Macaca fascicularis</i> (Crab-eating Macaque)         | Bacteria     | 2  | No  | No  | Yes | Resolved spontaneously                                  |
| <i>Petrogale penicillata</i> (Brush-tailed Rock-wallaby) | Tick         | 88 | No  | NA  | NA  | NA: wild free-living                                    |
| <i>Phascolarctos cinereus</i> (Koala)                    | Unknown      | 3  | No  | NA  | NA  | Dead on arrival                                         |
| <i>Rangifer tarandus</i> (Caribou)                       | Virus        | 1  | Yes | NA  | NA  | Dead on arrival                                         |
| <i>Rangifer tarandus</i> (Caribou)                       | Virus        | 14 | No  | NA  | NA  | NA: experiment, result was euthanasia                   |
| <i>Rangifer tarandus</i> (Caribou)                       | Apicomplexan | 23 | Yes | NA  | NA  | Euthanized                                              |
| <i>Rangifer tarandus</i> (Caribou)                       | Apicomplexan | 4  | No  | NA  | NA  | Euthanized                                              |



|                                                 |          |    |     |     |     |                                                                                   |
|-------------------------------------------------|----------|----|-----|-----|-----|-----------------------------------------------------------------------------------|
| <i>Rhinoceros unicornis</i> (Indian Rhinoceros) | Fungus   | 2  | No  | Yes | Yes | -                                                                                 |
| <i>Rhinoceros unicornis</i> (Indian Rhinoceros) | Unknown  | 1  | Yes | No  | NA  | Died due to concurrent disease or euthanized                                      |
| <i>Rusa unicolor</i> (Sambar)                   | Diptera  | 8  | No  | Yes | Yes | -                                                                                 |
| <i>Tremarctos ornatus</i> (Andean Bear)         | Unknown  | 3  | No  | Yes | Yes | -                                                                                 |
| <i>Tremarctos ornatus</i> (Andean Bear)         | Unknown  | 96 | Yes | NA  | NA  | Insufficient data                                                                 |
| <i>Tremarctos ornatus</i> (Andean Bear)         | Unknown  | 20 | No  | Yes | NA  | NA: Some treatment reported, but insufficient data on success, no deaths reported |
| <i>Ursus maritimus</i> (Polar Bear)             | Bacteria | 1  | No  | Yes | Yes | -                                                                                 |
| <i>Ursus maritimus</i> (Polar Bear)             | Bacteria | 2  | No  | Yes | Yes | -                                                                                 |
| <i>Ursus maritimus</i> (Polar Bear)             | Unknown  | 49 | No  | No  | NA  | NA: wild free-living; 12 spontaneously recovered                                  |
| <i>Ursus maritimus</i> (Polar Bear)             | Bacteria | 2  | No  | Yes | Yes | -                                                                                 |
